# Supplementary material for: Interventions to improve water supply and quality, sanitation and handwashing facilities in healthcare facilities, and their effect on healthcare-associated infections in low-income and middle-income countries: a systematic review and supplementary scoping review
Source: PubMed Central journal article supplement — BMJ Glob Health. 2019 Jul 8;4(4):e001632. doi: 10.1136/bmjgh-2019-001632 (PMC6626521; doi:10.1136/bmjgh-2019-001632), 2019-07-08
Supplement: bmjgh-2019-001632supp001.pdf [file bmjgh-2019-001632supp001.pdf]

## Appendix 1: Excluded Studies

| Author               | Year | Title                                                                                                                                                                                                                   | Reason for exclusion      |
|----------------------|------|-------------------------------------------------------------------------------------------------------------------------------------------------------------------------------------------------------------------------|---------------------------|
| Abramczyk et al      | 2011 | Preventing catheter-associated infections in the Pediatric Intensive Care Unit: impact of an educational program surveying policies for insertion and care of central venous catheters in a Brazilian teaching hospital | Before-after study design |
| Al Kuwaiti -         | 2017 | Impact of a multicomponent hand hygiene intervention strategy in reducing infection rates at a university hospital in Saudi Arabia                                                                                      | HIC                       |
| Al-Tawfiq and Abad   | 2010 | Decreasing ventilator-associated pneumonia in adult intensive care units using the Institute for Healthcare Improvement bundle. (Special Issue: Hand hygiene.)                                                          | HIC                       |
| Al-Tawfiq et al      | 2013 | Promoting and sustaining a hospital-wide, multifaceted hand hygiene program resulted in significant reduction in health care-associated infections                                                                      | HIC                       |
| Allegranzi et al     | 2009 | Successful implementation of the WHO multimodal hand hygiene improvement strategy and tools: A survey of 230 hospitals worldwide                                                                                        | Conference publication    |
| Allegranzi et al     | 2018 | A multimodal infection control and patient safety intervention to reduce surgical site infections in Africa: a multicentre, before-after, cohort study                                                                  | Before-after study design |
| Alp et al            | 2014 | Evaluation of the effectiveness of an infection control program in adult intensive care units: a report from a middle-income country                                                                                    | Before-after study design |
| Alvarez-Moreno et al | 2016 | Multicenter study in Colombia: Impact of a multidimensional International Nosocomial Infection Control Consortium (INICC) approach on central line-associated bloodstream infection rates                               | Before-after study design |

|                     |      |                                                                                                                                                                                                                                                                             |                              |
|---------------------|------|-----------------------------------------------------------------------------------------------------------------------------------------------------------------------------------------------------------------------------------------------------------------------------|------------------------------|
| Apisarntharak et al | 2013 | Practices to prevent multidrug-resistant <i>Acinetobacter baumannii</i> and methicillin-resistant <i>Staphylococcus aureus</i> in Thailand: a national survey                                                                                                               | Cross sectional study design |
| Apisarntharak et al | 2014 | Effectiveness of infection prevention measures featuring advanced source control and environmental cleaning to limit transmission of extremely-drug resistant <i>Acinetobacter baumannii</i> in a Thai intensive care unit: An analysis before and after extensive flooding | Before-after study design    |
| Apisarntharak et al | 2010 | Effectiveness of a catheter-associated bloodstream infection bundle in a Thai tertiary care center: a 3-year study                                                                                                                                                          | Before-after study design    |
| Azab et al          | 2015 | Reducing ventilator-associated pneumonia in neonatal intensive care unit using "VAP prevention Bundle": a cohort study                                                                                                                                                      | Before-after study design    |
| Benova et al        | 2014 | Where there is no toilet: water and sanitation environments of domestic and facility births in Tanzania                                                                                                                                                                     | No relevant outcomes         |
| Benova et al        | 2014 |                                                                                                                                                                                                                                                                             | Review                       |
| Blencowe            | 2011 | Clean birth and postnatal care practices to reduce neonatal deaths from sepsis and tetanus: a systematic review and Delphi estimation of mortality effect                                                                                                                   | Review                       |
| Bloomfield et al    | 2007 | The effectiveness of hand hygiene procedures in reducing the risks of infections in home and community settings including handwashing and alcohol-based hand sanitizers                                                                                                     | Review                       |
| Cheng et al         | 2014 | Minimal intervention for controlling nosocomial transmission of methicillin-resistant <i>Staphylococcus aureus</i> in resource limited setting with high endemicity                                                                                                         | HIC                          |
| Cheng et al         |      | Successful control of emerging vancomycin-resistant enterococci by territory-wide implementation of directly observed hand hygiene in patients in Hong Kong                                                                                                                 | HIC                          |

|                     |      |                                                                                                                                                                                                                           |                           |
|---------------------|------|---------------------------------------------------------------------------------------------------------------------------------------------------------------------------------------------------------------------------|---------------------------|
| Cheng et al         | 2014 | Proactive infection control measures to prevent nosocomial transmission of vancomycin-resistant enterococci in Hong Kong                                                                                                  | HIC                       |
| Cheng et al         | 2018 | Control of multidrug-resistant <i>Acinetobacter baumannii</i> in Hong Kong: Role of environmental surveillance in communal areas after a hospital outbreak                                                                | HIC                       |
| Chun et al          | 2016 | Impact of a hand hygiene campaign in a tertiary hospital in South Korea on the rate of hospital-onset methicillin-resistant <i>Staphylococcus aureus</i> bacteremia and economic evaluation of the campaign               | HIC                       |
| Dosher et al        | 2014 | The effect of a nurse-led multidisciplinary team on ventilator-associated pneumonia rates                                                                                                                                 | HIC                       |
| Ejemot et al        | 2015 | Hand washing promotion for preventing diarrhoea                                                                                                                                                                           | Review                    |
| Guanche-Garcell     | 2013 | Effectiveness of a multidimensional approach for the prevention of ventilator-associated pneumonia in an adult intensive care unit in Cuba: findings of the International Nosocomial Infection Control Consortium (INICC) | Before-after study design |
| Hossain             | 2011 | Clinical solid waste management practices and its impact on human health and environment--A review                                                                                                                        | Review                    |
| Jagi et al          | 2013 | Impact of an international nosocomial infection control consortium multidimensional approach on central line-associated bloodstream infection rates in adult intensive care units in eight cities in India                | Before-after study design |
| Kurlat et al        | 1998 | Infection control strategies in a neonatal intensive care unit in Argentina                                                                                                                                               | Before-after study design |
| Lam et al           | 2004 | Hand hygiene practices in a neonatal intensive care unit: a multimodal intervention and impact on nosocomial infection                                                                                                    | HIC                       |
| Leblebicioglu et al | 2013 | Impact of a multidimensional infection control approach on catheter-associated urinary tract infection rates in adult                                                                                                     | Before-after study design |

|                    |      |                                                                                                                                                                                                                                                    |                           |
|--------------------|------|----------------------------------------------------------------------------------------------------------------------------------------------------------------------------------------------------------------------------------------------------|---------------------------|
|                    |      | intensive care units in 10 cities of Turkey: International Nosocomial Infection Control Consortium findings (INICC)                                                                                                                                |                           |
| Lelebicioglu et al | 2013 | Impact of a multidimensional infection control approach on central line-associated bloodstream infections rates in adult intensive care units of 8 cities of Turkey: findings of the International Nosocomial Infection Control Consortium (INICC) | Before-after study design |
| Lelebicioglu et al | 2013 | Effectiveness of a multidimensional approach for prevention of ventilator-associated pneumonia in 11 adult intensive care units from 10 cities of Turkey: findings of the International Nosocomial Infection Control Consortium (INICC)            | Before-after study design |
| Lenz et al         | 2018 | Impact of a program aimed at reducing catheter-related infections implemented in nine pediatric intensive care units in Argentina                                                                                                                  | Before-after study design |
| Marra et al        | 2010 | Impact of a program to prevent central line-associated bloodstream infection in the zero tolerance era                                                                                                                                             | Before-after study design |
| Mathai et al       | 2010 | Prevention and control of health care-associated infections through improved hand hygiene                                                                                                                                                          | Review                    |
| Mehta et al        | 2013 | Effectiveness of a multidimensional approach for prevention of ventilator-associated pneumonia in 21 adult intensive-care units from 10 cities in India: findings of the International Nosocomial Infection Control Consortium (INICC)             | Before-after study design |
| Moffa et al        | 2017 | A systematic review of nosocomial waterborne infections in neonates and mothers                                                                                                                                                                    | Review                    |
| Murni et al        | 2015 | Reducing hospital-acquired infections and improving the rational use of antibiotics in a developing country: an effectiveness study                                                                                                                | Before-after study design |

|                         |      |                                                                                                                                                                                                                                                                       |                           |
|-------------------------|------|-----------------------------------------------------------------------------------------------------------------------------------------------------------------------------------------------------------------------------------------------------------------------|---------------------------|
| Navoa et al             | 2013 | Impact of an International Nosocomial Infection Control Consortium multidimensional approach on catheter-associated urinary tract infections in adult intensive care units in the Philippines: International Nosocomial Infection Control Consortium (INICC) findings | Before-after study design |
| Ng et al                | 2003 | Infection control for SARS in a tertiary neonatal centre                                                                                                                                                                                                              | HIC                       |
| Ng Y.Y et al            | 2015 | Impact of infection control training for interns on PICU-acquired bloodstream infections in a middle-income country                                                                                                                                                   | Before-after study design |
| Nour-Eldein & Eldahshan | 2015 | Education Intervention for Medical Students in Primary Care Settings, Ismailia City, Egypt                                                                                                                                                                            | No relevant outcomes      |
| Ogwang et al            | 2013 | Prevalence of hospital-associated infections can be decreased effectively in developing countries                                                                                                                                                                     | Before-after study design |
| Price et al             | 2018 | Effectiveness of national and subnational infection prevention and control interventions in high-income and upper-middle-income countries: a systematic review                                                                                                        | Review                    |
| Rosenthal et al         | 2006 | Impact of an infection control program on rates of ventilator-associated pneumonia in intensive care units in 2 Argentinean hospitals                                                                                                                                 | Before-after study design |
| Rosenthal et al         | 2005 | Reduction in nosocomial infection with improved hand hygiene in intensive care units of a tertiary care hospital in Argentina                                                                                                                                         | Before-after study design |
| Rosenthal et al         | 2012 | Impact of a multidimensional infection control strategy on central line-associated bloodstream infection rates in pediatric intensive care units of five developing countries: findings of the International Nosocomial Infection Control Consortium (INICC)          | Before-after study design |
| Rosenthal et al         | 2012 | Impact of a multidimensional infection control strategy on catheter-associated urinary tract infection rates in the adult intensive care units of 15 developing countries:                                                                                            | Before-after study design |

|                             |      |                                                                                                                                                     |                                                      |
|-----------------------------|------|-----------------------------------------------------------------------------------------------------------------------------------------------------|------------------------------------------------------|
|                             |      | findings of the International Nosocomial Infection Control Consortium (INICC)                                                                       |                                                      |
| Salama et al                | 2016 | Implementation of central venous catheter bundle in an intensive care unit in Kuwait: effect on central line-associated bloodstream infections      | HIC                                                  |
| Salama et al                | 2013 | The effect of hand hygiene compliance on hospital-acquired infections in an ICU setting in a Kuwaiti teaching hospital                              | HIC                                                  |
| Seward et al                | 2012 | Association between clean delivery kit use, clean delivery practices, and neonatal survival: pooled analysis of data from three sites in South Asia | Cross sectional study design                         |
| Srivastava et al            | 2007 | Healthcare-associated infections in neonatal units: lessons from contrasting worlds                                                                 | Review                                               |
| Starling et al              | 1997 | Applying the Centers for Disease Control and Prevention and National Nosocomial Surveillance system methods in Brazilian hospitals                  | Cross sectional study design                         |
| Sultangazieva et al         | 2015 | Facility-based control of healthcare-associated infection in maternities of Kyrgyzstan                                                              | Review                                               |
| Tanner et al                | 2016 | Surgical hand antisepsis to reduce surgical site infection                                                                                          | Review                                               |
| Vatankhah et al             | 2014 | Effect of executive programs of infection control committees on the prevalence of nosocomial infections in Kermanshah's Hospitals (2010-2011)       | No details of study design, intervention, population |
| Von Dolinger de Brito et al | 2007 | Effect of neonatal intensive care unit environment on the incidence of hospital-acquired infection in neonates                                      | Before-after study design                            |
| Zhou et al                  | 2015 | Successful reduction in central line-associated bloodstream infections in a Chinese neonatal intensive care unit                                    | Before-after study design                            |
| Zhou et al                  | 2013 | Efficacy of an infection control program in reducing ventilator-associated pneumonia in a Chinese neonatal intensive care unit                      | Before-After study                                   |
