# Supplementary material for: Interventions to improve water supply and quality, sanitation and handwashing facilities in healthcare facilities, and their effect on healthcare-associated infections in low-income and middle-income countries: a systematic review and supplementary scoping review
Source: PubMed Central journal article supplement — BMJ Glob Health. 2019 Jul 8;4(4):e001632. doi: 10.1136/bmjgh-2019-001632 (PMC6626521; doi:10.1136/bmjgh-2019-001632), 2019-07-08
Supplement: bmjgh-2019-001632supp002.pdf [file bmjgh-2019-001632supp002.pdf]

## APPENDIX 2 – SEARCH STRATEGIES

Search strategies for "Interventions to improve drinking water supply and quality, sanitation and handwashing facilities in health care facilities, and their effect on health care-associated infections in low and middle-income countries: A systematic review and supplementary scoping review"

### Introduction to the search strategy

The search strategy was constructed around three concepts: water, sanitation and hygiene; health care facilities; low and middle income countries. The list of LMIC countries were taken from the 2017 World Bank country classification. Results were limited to those published from 1970 to current and published in English. Where possible the search was limited to primary research or reviews. An initial search strategy was constructed by a professional librarian in OvidSP Medline. Comments on the draft search strategy and results were received from the rest of the research team and incorporated into an updated search draft. This process was repeated until the precision and sensitivity of the search met resource requirements. The OvidSP Medline search was run across all other databases, with edits made to incorporate differences in thesaurus terms and search syntax.

### Databases searched

The following databases were searched:

- \* OvidSP Medline (1946 to April Week 2 2018)
- \* OvidSP Embase (1947 to 2018 April 23)
- \* OvidSP Global Health (1910 to 2018 week 15)
- \* Ebsco CINAHL Plus (complete database as of 25/04/2018)
- \* Ebsco AfricaWide Information (complete database as of 25/04/2018)
- \* Web of Science Core Collection, which contains the following databases:
  - Science Citation Index Expanded (1970–present)
  - Social Sciences Citation Index (1970–present)
  - Arts & Humanities Citation Index (1975–present)
  - Conference Proceedings Citation Index–Science (1990–present)
  - Conference Proceedings Citation Index–Social Science & Humanities (1990–present)
  - Emerging Sources Citation Index (2015–present)  
Data last updated 2018/04/25
- \* Web of Science SciELO (1997 – present). Data last updated 2018/04/24

### Information management

Search results were uploaded to EndNote X8 software and deduplicated

### Search strategies

OvidSP Medline

Dates of database coverage: 1946 to April Week 2 2018

Date searched: 24/04/2018

1 Communicable Disease Control/ (19942)  
2 exp Infection Control/ (58681)  
3 Decontamination/ (4274)  
4 infect\* control\*.ti,ab. (17723)  
5 (disease adj1 control\*).ti,ab. (35084)  
6 (environ\* adj3 contaminat\*).ti,ab. (7336)  
7 sterili#at\*.ti,ab. (19063)  
8 decontaminat\*.ti,ab. (8928)  
9 disinfect\*.ti,ab. (21528)  
10 (clean or cleans or cleaned or cleaning).ti,ab. (46843)  
11 autoclave?.ti,ab. (3184)  
12 exp Sanitation/ (82088)  
13 drinking water/ (5764)  
14 Environmental Microbiology/ (6813)  
15 water microbiology/ (31105)  
16 Water Quality/ (4101)  
17 exp Sanitary Engineering/ (99361)  
18 dirty water.ti,ab. (69)  
19 surface water.ti,ab. (8670)  
20 rainwater.ti,ab. (1195)  
21 rain-water.ti,ab. (339)  
22 (water adj4 (puri\* or floccul\* or stagna\* or contaminat\* or  
recontaminat\* or re-contaminat\*).ti,ab. (13663)  
23 (water adj3 (quality or chlor\* or coagulation or turbidity or  
microbiol\* or pipe? or standpipe? or pump\* or handpump\* or distance  
or connect\* or access\* or quantity or quantities or volume? or  
sediment\*).ti,ab. (38175)  
24 (water adj2 (safe\* or unsafe\* or filtr\* or filter\* or supply  
or store? or storage or drink\* or consum\* or distribut\*).ti,ab.  
(56655)  
25 (water adj1 (treat\* or improv\* or radiat\* or irradiat\* or  
reserve?)).ti,ab. (10581)  
26 Hygiene/ (15205)  
27 exp Hand Hygiene/ (5939)  
28 Detergents/ (16671)  
29 Soaps/ (2401)  
30 hygien\*.ti,ab. (58006)  
31 (hand adj3 wash\*).ti,ab. (2207)  
32 handwash\*.ti,ab. (1567)  
33 soap?.ti,ab. (4452)  
34 detergent?.ti,ab. (36845)  
35 hand-rub?.ti,ab. (440)  
36 handrub?.ti,ab. (120)  
37 hand gel?.ti,ab. (92)  
38 alcohol-based gel?.ti,ab. (24)  
39 alcohol-based rub.ti,ab. (6)  
40 wash\* facilit\*.ti,ab. (101)  
41 (water adj2 (laundry or wash\* or bath\*).ti,ab. (6178)  
42 sink?.ti,ab. (8862)

43 faucet?.ti,ab. (283)  
44 tap?.ti,ab. (33163)  
45 bucket?.ti,ab. (1252)  
46 bowl?.ti,ab. (1765)  
47 exp Waste Water/ (35770)  
48 exp Medical Waste/ (3212)  
49 Solid Waste/ (1585)  
50 Waste Products/ (4218)  
51 (waste adj4 (medical or solid? or product\* or water or sharp?  
or hazard\* or organic\* or food\* or lab\* or surg\* or biolog\* or  
contaminat\* or infect\*)).ti,ab. (17157)  
52 (wastewater or waste-water).ti,ab. (34782)  
53 (inanimate adj2 environment\*).ti,ab. (107)  
54 (sanitary or sanitation).ti,ab. (18302)  
55 toilet\*.ti,ab. (4563)  
56 latrine?.ti,ab. (1031)  
57 (potty or potties).ti,ab. (65)  
58 pit?.ti,ab. (15968)  
59 (privy or privies).ti,ab. (118)  
60 wc.ti,ab. (5868)  
61 water closet?.ti,ab. (43)  
62 pour flush.ti,ab. (10)  
63 shower?.ti,ab. (1711)  
64 sewerage.ti,ab. (439)  
65 sewer?.ti,ab. (2029)  
66 septic tank?.ti,ab. (492)  
67 open defecation.ti,ab. (108)  
68 grease trap?.ti,ab. (26)  
69 (faeces adj3 (dispos\* or manag\* or service\* or collect\* or  
store\* or segregat\* or safe or treat\* or improv\* or microbiol\* or  
contaminat\* or recontaminat\* or re-contaminat\* or incinerat\* or  
burn\* or fire or compost\*)).ti,ab. (1134)  
70 (feces adj3 (dispos\* or manag\* or service\* or collect\* or  
store\* or segregat\* or safe or treat\* or improv\* or microbiol\* or  
contaminat\* or recontaminat\* or re-contaminat\* or incinerat\* or  
burn\* or fire or compost\*)).ti,ab. (2193)  
71 (faecal adj3 (dispos\* or manag\* or service\* or collect\* or  
store\* or segregat\* or safe or treat\* or improv\* or microbiol\* or  
contaminat\* or recontaminat\* or re-contaminat\* or incinerat\* or  
burn\* or fire or compost\*)).ti,ab. (3011)  
72 (fecal adj3 (dispos\* or manag\* or service\* or collect\* or  
store\* or segregat\* or safe or treat\* or improv\* or microbiol\* or  
contaminat\* or recontaminat\* or re-contaminat\* or incinerat\* or  
burn\* or fire or compost\*)).ti,ab. (5704)  
73 (excre\* adj3 (dispos\* or manag\* or service\* or collect\* or  
store\* or segregat\* or safe or treat\* or improv\* or microbiol\* or  
contaminat\* or recontaminat\* or re-contaminat\* or incinerat\* or  
burn\* or fire or compost\*)).ti,ab. (3026)  
74 (defecat\* adj3 (dispos\* or manag\* or service\* or collect\* or  
store\* or segregat\* or safe or treat\* or improv\* or microbiol\* or  
contaminat\* or recontaminat\* or re-contaminat\* or incinerat\* or  
burn\* or fire or compost\*)).ti,ab. (373)  
75 (solids adj3 (dispos\* or manag\* or service\* or collect\* or  
store\* or segregat\* or safe or treat\* or improv\* or microbiol\* or

contaminat\* or recontaminat\* or re-contaminat\* or incinerat\* or burn\* or fire or compost\*).ti,ab. (388)

76 (waste adj3 (dispos\* or manag\* or service\* or collect\* or store\* or segregat\* or safe or treat\* or improv\* or microbiol\* or contaminat\* or recontaminat\* or re-contaminat\* or incinerat\* or burn\* or fire or compost\*).ti,ab. (13168)

77 (garbage adj3 (dispos\* or manag\* or service\* or collect\* or store\* or segregat\* or safe or treat\* or improv\* or microbiol\* or contaminat\* or recontaminat\* or re-contaminat\* or incinerat\* or burn\* or fire or compost\*).ti,ab. (357)

78 (rubbish adj3 (dispos\* or manag\* or service\* or collect\* or store\* or segregat\* or safe or treat\* or improv\* or microbiol\* or contaminat\* or recontaminat\* or re-contaminat\* or incinerat\* or burn\* or fire or compost\*).ti,ab. (29)

79 (sharps adj3 (dispos\* or manag\* or service\* or collect\* or store\* or segregat\* or safe or treat\* or improv\* or microbiol\* or contaminat\* or recontaminat\* or re-contaminat\* or incinerat\* or burn\* or fire or compost\*).ti,ab. (285)

80 (softs adj3 (dispos\* or manag\* or service\* or collect\* or store\* or segregat\* or safe or treat\* or improv\* or microbiol\* or contaminat\* or recontaminat\* or re-contaminat\* or incinerat\* or burn\* or fire or compost\*).ti,ab. (0)

81 (dressing? adj3 (dispos\* or manag\* or service\* or collect\* or store\* or segregat\* or safe or treat\* or improv\* or microbiol\* or contaminat\* or recontaminat\* or re-contaminat\* or incinerat\* or burn\* or fire or compost\*).ti,ab. (1991)

82 (needle? adj3 (dispos\* or manag\* or service\* or collect\* or store\* or segregat\* or safe or treat\* or improv\* or microbiol\* or contaminat\* or recontaminat\* or re-contaminat\* or incinerat\* or burn\* or fire or compost\*).ti,ab. (3218)

83 (scalpel? adj3 (dispos\* or manag\* or service\* or collect\* or store\* or segregat\* or safe or treat\* or improv\* or microbiol\* or contaminat\* or recontaminat\* or re-contaminat\* or incinerat\* or burn\* or fire or compost\*).ti,ab. (162)

84 (food? adj3 (dispos\* or manag\* or collect\* or store\* or segregat\* or incinerat\* or burn\* or fire)).ti,ab. (4567)

85 (medical adj3 (dispos\* or collect\* or store\* or segregat\* or incinerat\* or burn\* or fire)).ti,ab. (6797)

86 (surg\* adj3 (dispos\* or collect\* or store\* or segregat\* or incinerat\* or burn\* or fire)).ti,ab. (5632)

87 (biolog\* adj3 (dispos\* or manag\* or collect\* or store\* or segregat\* or incinerat\* or burn\* or fire)).ti,ab. (3201)

88 (anatom\* adj3 (dispos\* or manag\* or collect\* or store\* or segregat\* or incinerat\* or burn\* or fire)).ti,ab. (1236)

89 (corpse? adj3 (dispos\* or manag\* or collect\* or store\* or segregat\* or incinerat\* or burn\* or fire)).ti,ab. (97)

90 (cadaver? adj3 (dispos\* or manag\* or collect\* or store\* or segregat\* or incinerat\* or burn\* or fire)).ti,ab. (235)

91 (bin or bins).ti,ab. (3534)

92 dustbin?.ti,ab. (44)

93 garbage can?.ti,ab. (46)

94 personal protective equipment.ti,ab. (1680)

95 safety box\*.ti,ab. (18)

96 or/1-95 (641831)

97 health facilities/ (13726)  
98 exp rehabilitation centers/ (13647)  
99 nurseries, hospital/ (1560)  
100 leper colonies/ (287)  
101 laboratories, hospital/ (4499)  
102 exp hospitals/ (250645)  
103 exp hospital units/ (96660)  
104 exp dental facilities/ (8355)  
105 birthing centers/ (698)  
106 exp academic medical centers/ (84868)  
107 exp ambulatory care facilities/ (51345)  
108 residential facilities/ (5095)  
109 assisted living facilities/ (1202)  
110 group homes/ (916)  
111 homes for the aged/ (12805)  
112 exp nursing homes/ (36289)  
113 halfway houses/ (1049)  
114 mortuary practice/ (923)  
115 hospital?.ti,ab. (846107)  
116 (care adj1 (clinic or facility or facilities or centre? or center? or institution? or ward? or setting? or service? or room? or unit? or theatre? or theater?)).ti,ab. (188000)  
117 (healthcare adj1 (clinic or facility or facilities or centre? or center? or institution? or ward? or setting? or service? or room? or unit? or theatre? or theater?)).ti,ab. (14908)  
118 ((health adj1 (clinic or facility or facilities or institution? or ward? or setting? or service? or room? or unit? or theatre? or theater?)) or health centre? or health center?).ti,ab. (118764)  
119 (medic\* adj1 (clinic or facility or facilities or centre? or center? or institution? or ward? or setting? or service? or room? or unit? or theatre? or theater?)).ti,ab. (101652)  
120 (nurs\* adj1 (clinic or facility or facilities or centre? or center? or institution? or ward? or setting? or service? or room? or unit? or theatre? or theater?)).ti,ab. (13640)  
121 (secondary adj1 (clinic or facility or facilities or centre? or center? or institution? or ward? or setting? or service? or room? or unit? or theatre? or theater?)).ti,ab. (1044)  
122 (primary adj1 (clinic or facility or facilities or centre? or center? or institution? or ward? or setting? or service? or room? or unit? or theatre? or theater?)).ti,ab. (3149)  
123 (tertiary adj1 (clinic or facility or facilities or centre? or center? or institution? or ward? or setting? or service? or room? or unit? or theatre? or theater?)).ti,ab. (12661)  
124 (matern\* adj1 (clinic or facility or facilities or centre? or center? or institution? or ward? or setting? or service? or room? or unit? or theatre? or theater?)).ti,ab. (5529)  
125 (birth\* adj1 (clinic or facility or facilities or centre? or center? or institution? or ward? or setting? or service? or room? or unit? or theatre? or theater?)).ti,ab. (1434)  
126 ((dentist or dental) adj1 (clinic or facility or facilities or centre? or center? or institution? or ward? or setting? or service? or room? or unit? or theatre? or theater?)).ti,ab. (7722)  
127 (neonat\* adj1 (clinic or facility or facilities or centre?

or center? or institution? or ward? or setting? or service? or room?  
or unit? or theatre? or theater?)).ti,ab. (3849)

128 ((baby or babies) adj1 (clinic or facility or facilities or  
centre? or center? or institution? or ward? or setting? or service?  
or room? or unit? or theatre? or theater?)).ti,ab. (828)

129 ((paediatric? or pediatric?) adj1 (clinic or facility or  
facilities or centre? or center? or institution? or ward? or  
setting? or service? or room? or unit? or theatre? or  
theater?)).ti,ab. (8858)

130 (geriatric? adj1 (clinic or facility or facilities or  
centre? or center? or institution? or ward? or setting? or service?  
or room? or unit? or theatre? or theater?)).ti,ab. (2811)

131 (outpatient? adj1 (clinic or facility or facilities or  
centre? or center? or institution? or ward? or setting? or service?  
or room? or unit? or theatre? or theater?)).ti,ab. (28707)

132 (out-patient? adj1 (clinic or facility or facilities or  
centre? or center? or institution? or ward? or setting? or service?  
or room? or unit? or theatre? or theater?)).ti,ab. (2511)

133 ((emergency or emergencies) adj1 (clinic or facility or  
facilities or centre? or center? or institution? or ward? or  
setting? or service? or room? or unit? or theatre? or  
theater?)).ti,ab. (24565)

134 (psychiatric adj1 (clinic or facility or facilities or  
centre? or center? or institution? or ward? or setting? or service?  
or room? or unit? or theatre? or theater?)).ti,ab. (12075)

135 (mental adj1 (clinic or facility or facilities or centre? or  
center? or institution? or ward? or setting? or service? or room? or  
unit? or theatre? or theater?)).ti,ab. (591)

136 (rehab\* adj1 (clinic or facility or facilities or centre? or  
center? or institution? or ward? or setting? or service? or room? or  
unit? or theatre? or theater?)).ti,ab. (14360)

137 ((surgical or surgery or surgeries) adj1 (clinic or facility  
or facilities or centre? or center? or institution? or ward? or  
setting? or service? or room? or unit? or theatre? or  
theater?)).ti,ab. (20013)

138 (long stay? adj1 (clinic or facility or facilities or  
centre? or center? or institution? or ward? or setting? or service?  
or room? or unit? or theatre? or theater?)).ti,ab. (229)

139 (acute adj1 (clinic or facility or facilities or centre? or  
center? or institution? or ward? or setting? or service? or room? or  
unit? or theatre? or theater?)).ti,ab. (3158)

140 (sub-acute adj1 (clinic or facility or facilities or centre?  
or center? or institution? or ward? or setting? or service? or room?  
or unit? or theatre? or theater?)).ti,ab. (34)

141 (subacute adj1 (clinic or facility or facilities or centre?  
or center? or institution? or ward? or setting? or service? or room?  
or unit? or theatre? or theater?)).ti,ab. (159)

142 icu.ti,ab. (37448)

143 nicu.ti,ab. (6624)

144 (burn? adj1 (clinic or facility or facilities or centre? or  
center? or institution? or ward? or setting? or service? or room? or  
unit? or theatre? or theater?)).ti,ab. (3895)

145 (stroke? adj1 (clinic or facility or facilities or centre?  
or center? or institution? or ward? or setting? or service? or room?

or unit? or theatre? or theater?)).ti,ab. (3900)  
146 (coronary adj1 (clinic or facility or facilities or centre?  
or center? or institution? or ward? or setting? or service? or room?  
or unit? or theatre? or theater?)).ti,ab. (508)  
147 (recovery adj1 (clinic or facility or facilities or centre?  
or center? or institution? or ward? or setting? or service? or room?  
or unit? or theatre? or theater?)).ti,ab. (3648)  
148 (respiratory adj1 (clinic or facility or facilities or  
centre? or center? or institution? or ward? or setting? or service?  
or room? or unit? or theatre? or theater?)).ti,ab. (2189)  
149 (operating adj1 (clinic or facility or facilities or centre?  
or center? or institution? or ward? or setting? or service? or room?  
or unit? or theatre? or theater?)).ti,ab. (24975)  
150 (delivery adj1 (clinic or facility or facilities or centre?  
or center? or institution? or ward? or setting? or room? or unit? or  
theatre? or theater?)).ti,ab. (3212)  
151 facility birth.ti,ab. (40)  
152 facility-based.ti,ab. (1343)  
153 facility-care.ti,ab. (126)  
154 (mortuary or mortuaries).ti,ab. (517)  
155 Health Personnel/ (33138)  
156 allied health personnel/ (11030)  
157 nutritionists/ (839)  
158 operating room technicians/ (635)  
159 physical therapist assistants/ (7)  
160 physical therapists/ (1171)  
161 exp physician assistants/ (5203)  
162 "coroners and medical examiners"/ (1956)  
163 dental staff, hospital/ (231)  
164 exp dentists/ (17771)  
165 faculty, dental/ (2297)  
166 faculty, medical/ (11910)  
167 faculty, nursing/ (9247)  
168 infection control practitioners/ (670)  
169 exp medical staff/ (26197)  
170 exp nurses/ (82164)  
171 exp nursing staff/ (62299)  
172 exp physicians/ (119731)  
173 healthcare worker?.ti,ab. (6202)  
174 health-care worker?.ti,ab. (10037)  
175 hcw.ti,ab. (1432)  
176 nurse?.ti,ab. (212652)  
177 doctor?.ti,ab. (95480)  
178 physician?.ti,ab. (306022)  
179 surgeon?.ti,ab. (145967)  
180 (anaesthetist? or anesthetist? or anesthesiologist?).ti,ab.  
(22343)  
181 dentist?.ti,ab. (29534)  
182 physiotherapist?.ti,ab. (5112)  
183 physical therapist?.ti,ab. (4269)  
184 dietician?.ti,ab. (1161)  
185 occupational therapist?.ti,ab. (4013)  
186 psychiatrist?.ti,ab. (19857)  
187 mortician?.ti,ab. (37)

188 coroner?.ti,ab. (2123)  
189 or/97-188 (2195503)  
190 ((developing or less\* developed or under developed or underdeveloped or middle income or low\* income or underserved or under served or deprived or poor\*) adj (economy or economies)).ti,ab. (404)  
191 ((developing or less\* developed or under developed or underdeveloped or middle income or low\* income or underserved or under served or deprived or poor\*) adj (countr\* or nation? or population? or world)).ti,ab. (68578)  
192 (low\* adj (gdp or gnp or gross domestic or gross national)).ti,ab. (196)  
193 (low adj3 middle adj3 countr\*).ti,ab. (7312)  
194 (lmic or lmics or third world or lami countr\*).ti,ab. (4353)  
195 transitional countr\*.ti,ab. (125)  
196 global south.ti,ab. (150)  
197 Developing Countries/ (69802)  
198 "africa south of the sahara"/ or africa, central/ or africa, eastern/ or africa, southern/ or africa, western/ (18539)  
199 ("africa south of the sahara" or sub-saharan africa or central africa or eastern africa or southern africa or western africa).ti,ab. (19712)  
200 "Democratic People's Republic of Korea"/ (183)  
201 (north korea or (democratic people\* republic adj2 korea)).ti,ab. (253)  
202 Cambodia/ (2834)  
203 cambodia.ti,ab. (2697)  
204 Indonesia/ (8777)  
205 indonesia.ti,ab. (7983)  
206 Micronesia/ (1073)  
207 Kiribati.ti,ab. (127)  
208 Laos/ (1633)  
209 (laos or (lao adj1 democratic republic)).ti,ab. (1338)  
210 (marshall island\* or caroline island\* or ellice island\* or gilbert island\* or johnston island\* or mariana island\* or micronesia).ti,ab. (895)  
211 Mongolia/ (1531)  
212 mongolia.ti,ab. (2622)  
213 Myanmar/ (1887)  
214 (myanmar or burma).ti,ab. (2538)  
215 Papua New Guinea/ (3211)  
216 Papua New Guinea.ti,ab. (3802)  
217 Philippines/ (7574)  
218 Philippines.ti,ab. (6141)  
219 Timor-Leste/ (146)  
220 Timor-Leste.ti,ab. (191)  
221 Vanuatu/ (321)  
222 Vanuatu.ti,ab. (483)  
223 Vietnam/ (10600)  
224 (Viet Nam or Vietnam).ti,ab. (10867)  
225 American Samoa/ (159)  
226 american samoa.ti,ab. (286)  
227 exp China/ (147196)  
228 china.ti,ab. (105640)



229 Fiji/ (833)  
230 fiji.ti,ab. (1148)  
231 Malaysia/ (12961)  
232 malaysia.ti,ab. (10056)  
233 marshall islands.ti,ab. (246)  
234 nauru.ti,ab. (123)  
235 samoa/ (295)  
236 "independent state of samoa"/ (243)  
237 ("independent state of samoa" or (samoa not american samoa)  
or western samoa or navigator islands or samoan islands).ti,ab.  
(420)  
238 Thailand/ (23549)  
239 Thailand.ti,ab. (20138)  
240 Tonga/ (237)  
241 tonga.ti,ab. (328)  
242 Tuvalu.ti,ab. (46)  
243 Armenia/ (1294)  
244 Armenia.ti,ab. (749)  
245 "Georgia (Republic)"/ (1562)  
246 Kosovo/ (124)  
247 Kosovo.ti,ab. (634)  
248 Kyrgyzstan/ (1202)  
249 (kyrgyzstan or kyrgyz republic or kirghizia or  
kirghiz).ti,ab. (751)  
250 Moldova/ (642)  
251 Moldova.ti,ab. (360)  
252 Tajikistan/ (685)  
253 tajikistan.ti,ab. (392)  
254 Ukraine/ (15215)  
255 Ukraine.ti,ab. (3432)  
256 Uzbekistan/ (1853)  
257 Uzbekistan.ti,ab. (923)  
258 Albania/ (762)  
259 Albania.ti,ab. (741)  
260 Azerbaijan/ (1136)  
261 Azerbaijan.ti,ab. (873)  
262 "Republic of Belarus"/ (1992)  
263 (belarus or byelarus or belorussia).ti,ab. (1186)  
264 Bosnia-Herzegovina/ (1847)  
265 (bosnia or herzegovina).ti,ab. (1721)  
266 Bulgaria/ (6067)  
267 Bulgaria.ti,ab. (3329)  
268 Croatia/ (6158)  
269 croatia.ti,ab. (4946)  
270 Kazakhstan/ (2394)  
271 (Kazakhstan or kazakh).ti,ab. (1882)  
272 "Macedonia (Republic)"/ (473)  
273 Macedonia.ti,ab. (793)  
274 Montenegro/ (157)  
275 Montenegro.ti,ab. (612)  
276 Romania/ (9340)  
277 Romania.ti,ab. (3874)  
278 exp Russia/ (50305)  
279 USSR/ (42657)

280 (Russia or Russian Federation or USSR or Union of Soviet  
Socialist Republics or Soviet Union).ti,ab. (22986)  
281 Serbia/ (2523)  
282 serbia.ti,ab. (3076)  
283 Turkey/ (29893)  
284 turkey.ti,ab. not animal/ (16263)  
285 Turkmenistan/ (556)  
286 Turkmenistan.ti,ab. (254)  
287 Yugoslavia/ (9046)  
288 yugoslavia.ti,ab. (2159)  
289 Haiti/ (2832)  
290 Haiti.ti,ab. (2304)  
291 Bolivia/ (2273)  
292 Bolivia.ti,ab. (2448)  
293 El Salvador/ (803)  
294 El Salvador.ti,ab. (992)  
295 Guatemala/ (2674)  
296 Guatemala.ti,ab. (2596)  
297 Honduras/ (994)  
298 Honduras.ti,ab. (1276)  
299 Nicaragua/ (1335)  
300 Nicaragua.ti,ab. (1432)  
301 Argentina/ (13672)  
302 Argentina.ti,ab. (12043)  
303 Belize/ (523)  
304 Belize.ti,ab. (582)  
305 Brazil/ (76662)  
306 Brazil.ti,ab. (59191)  
307 Colombia/ (8454)  
308 Colombia.ti,ab. (8068)  
309 Costa Rica/ (3299)  
310 Costa Rica.ti,ab. (3605)  
311 Cuba/ (4747)  
312 Cuba.ti,ab. (3588)  
313 Dominica/ (84)  
314 Dominica.ti,ab. (334)  
315 Dominican Republic/ (1386)  
316 Dominican Republic.ti,ab. (1369)  
317 Ecuador/ (3076)  
318 Ecuador.ti,ab. (2884)  
319 Grenada/ (117)  
320 Grenada.ti,ab. (230)  
321 Guyana/ (620)  
322 Guyana.mp. (998)  
323 Jamaica/ (3294)  
324 Jamaica.ti,ab. (2619)  
325 Mexico/ (33864)  
326 Mexico.ti,ab. (30762)  
327 exp Panama/ (2210)  
328 Panama.ti,ab. (2961)  
329 Paraguay/ (690)  
330 Paraguay.mp. (1256)  
331 Peru/ (7359)  
332 Peru.ti,ab. (7230)

333 Saint Lucia/ (64)  
334 (St Lucia or Saint Lucia).ti,ab. (276)  
335 "Saint Vincent and the Grenadines"/ (46)  
336 Grenadines.ti,ab. (50)  
337 Suriname/ (855)  
338 Suriname.ti,ab. (375)  
339 Venezuela/ (4620)  
340 Venezuela.ti,ab. (4287)  
341 Djibouti/ (205)  
342 (Djibouti or French Somaliland).ti,ab. (304)  
343 Egypt/ (12894)  
344 Egypt.ti,ab. (9802)  
345 Jordan/ (3470)  
346 Jordan.ti,ab. (3927)  
347 Morocco/ (4961)  
348 Morocco.ti,ab. (3933)  
349 Syria/ (1396)  
350 (Syria or Syrian Arab Republic).ti,ab. (1153)  
351 Tunisia/ (7210)  
352 tunisia.ti,ab. (4976)  
353 Gaza.ti,ab. (689)  
354 Yemen/ (1234)  
355 Yemen.ti,ab. (1267)  
356 Algeria/ (2636)  
357 Algeria.ti,ab. (2277)  
358 Iran/ (20677)  
359 Iran.ti,ab. (16161)  
360 Iraq/ (4216)  
361 Iraq.ti,ab. (4825)  
362 Jordan/ (3470)  
363 Jordan.ti,ab. (3927)  
364 Lebanon/ (3586)  
365 Lebanon.ti,ab. (2972)  
366 Libya/ (1043)  
367 Libya.ti,ab. (869)  
368 Afghanistan/ (2857)  
369 Afghanistan.ti,ab. (4241)  
370 Nepal/ (6561)  
371 Nepal.ti,ab. (6176)  
372 Bangladesh/ (9024)  
373 Bangladesh.ti,ab. (9135)  
374 Bhutan/ (340)  
375 Bhutan.ti,ab. (408)  
376 exp India/ (91132)  
377 India.ti,ab. (61513)  
378 Pakistan/ (14351)  
379 Pakistan.ti,ab. (11130)  
380 Sri Lanka/ (5166)  
381 Sri Lanka.ti,ab. (4391)  
382 Indian Ocean Islands/ (704)  
383 Maldives.ti,ab. (199)  
384 Benin/ (1321)  
385 (Benin or Dahomey).ti,ab. (2532)  
386 Burkina Faso/ (2792)

387 (Burkina Faso or Burkina Fasso or Upper Volta).ti,ab. (3108)  
388 Burundi/ (600)  
389 Burundi.ti,ab. (629)  
390 Central African Republic/ (712)  
391 (Central African Republic or Ubangi-Shari).ti,ab. (806)  
392 Chad/ (651)  
393 Chad.ti,ab. (888)  
394 Comoros/ (260)  
395 (Comoros or Comoro Islands or Mayotte or Iles  
Comores).ti,ab. (436)  
396 "Democratic Republic of the Congo"/ (3628)  
397 ((democratic republic adj2 congo) or belgian congo or  
zaire).ti,ab. (3408)  
398 Eritrea/ (269)  
399 Eritrea.ti,ab. (356)  
400 Ethiopia/ (9674)  
401 Ethiopia.ti,ab. (8553)  
402 Gambia/ (2287)  
403 Gambia.ti,ab. (1944)  
404 Guinea/ (890)  
405 (Guinea not (New Guinea or Guinea Pig\* or Guinea  
Fowl)).ti,ab. (3044)  
406 Guinea-Bissau/ (848)  
407 (Guinea-Bissau or Portuguese Guinea).ti,ab. (838)  
408 Liberia/ (1038)  
409 Liberia.ti,ab. (1121)  
410 Madagascar/ (3019)  
411 (Madagascar or Malagasy Republic).ti,ab. (3592)  
412 Malawi/ (4305)  
413 (Malawi or Nyasaland).ti,ab. (4625)  
414 Mali/ (2088)  
415 Mali.ti,ab. (2624)  
416 Mozambique/ (1959)  
417 (Mozambique or Mocambique or Portuguese East Africa).ti,ab.  
(2476)  
418 Niger/ (1053)  
419 (Niger not (Aspergillus or Peptococcus or Schizothorax or  
Cruciferae or Gobius or Lasius or Agelastes or Melanosuchus or  
radish or Parastromateus or Orius or Apergillus or Parastromateus or  
Stomoxys)).ti,ab. (2468)  
420 Rwanda/ (1972)  
421 (Rwanda or Ruanda).ti,ab. (2011)  
422 Senegal/ (5266)  
423 senegal.ti,ab. (4565)  
424 Sierra Leone/ (1261)  
425 Sierra Leone.ti,ab. (1467)  
426 Somalia/ (1396)  
427 Somalia.ti,ab. (1029)  
428 South Sudan/ (77)  
429 south sudan.ti,ab. (300)  
430 Tanzania/ (9720)  
431 (Tanzania or Tanganyika or Zanzibar).ti,ab. (9670)  
432 Togo/ (993)  
433 (Togo or Togolese Republic).ti,ab. (1107)

434 Uganda/ (10173)  
435 Uganda.ti,ab. (9778)  
436 Zimbabwe/ (5317)  
437 (Zimbabwe or Rhodesia).ti,ab. (4733)  
438 Angola/ (859)  
439 angola.ti,ab. (1023)  
440 Cameroon/ (4689)  
441 Cameroon.ti,ab. (4893)  
442 Cape Verde/ (152)  
443 (Cape Verde or Cabo Verde).ti,ab. (442)  
444 Congo/ (1657)  
445 (congo not ((democratic republic adj3 congo) or congo red or  
crimean-congo)).ti,ab. (2078)  
446 Cote d'Ivoire/ (2849)  
447 (Cote d'Ivoire or Ivory Coast).ti,ab. (3059)  
448 Ghana/ (6477)  
449 (Ghana or Gold Coast).ti,ab. (6590)  
450 Kenya/ (13837)  
451 kenya.mp. (16731)  
452 Lesotho/ (366)  
453 (Lesotho or Basutoland).ti,ab. (506)  
454 Mauritania/ (397)  
455 Mauritania.ti,ab. (476)  
456 Nigeria/ (25325)  
457 Nigeria.ti,ab. (19518)  
458 Atlantic Islands/ (722)  
459 (sao tome adj2 principe).ti,ab. (105)  
460 Sudan/ (4363)  
461 (Sudan not south sudan).ti,ab. (5720)  
462 Swaziland/ (476)  
463 Swaziland.ti,ab. (626)  
464 Zambia/ (3876)  
465 (Zambia or Northern Rhodesia).ti,ab. (3762)  
466 Botswana/ (1507)  
467 (Botswana or Bechuanaland or Kalahari).ti,ab. (1770)  
468 Equatorial Guinea/ (229)  
469 (Equatorial Guinea or Spanish Guinea).ti,ab. (336)  
470 Gabon/ (1354)  
471 (Gabon or Gabonese Republic).ti,ab. (1405)  
472 Mauritius/ (510)  
473 (Mauritius or Agalega Islands).ti,ab. (722)  
474 Namibia/ (899)  
475 Namibia.ti,ab. (1032)  
476 South Africa/ (37186)  
477 South Africa.ti,ab. (23112)  
478 or/190-477 [ALL LMIC] (1124670)  
479 96 and 189 and 478 (14854)  
480 humans/ (17012555)  
481 animals/ (6189570)  
482 480 and 481 (1775572)  
483 481 not 482 (4413998)  
484 479 not 483 (14755)  
485 limit 484 to yr="1970 -Current" (14560)  
486 (addresses or autobiography or bibliography or biography or

comment or dataset or dictionary or directory or editorial or interactive tutorial or legislation or letter or news or newspaper article or periodical index or portraits or video audio media or webcasts).pt. (1880122)

487 485 not 486 (14118)

488 limit 487 to english language (11455)

OvidSP Embase

Dates of database coverage: 1947 to 2018 April 23

Date searched: 24/04/2018

1 communicable disease control/ (616)  
2 infection control/ (79869)  
3 infect\* control\*.ti,ab. (26955)  
4 (disease adj1 control\*).ti,ab. (56613)  
5 (environ\* adj3 contaminat\*).ti,ab. (10524)  
6 sterili#at\*.ti,ab. (26122)  
7 decontaminat\*.ti,ab. (13624)  
8 disinfect\*.ti,ab. (32241)  
9 (clean or cleans or cleaned or cleaning).ti,ab. (79859)  
10 autoclave?.ti,ab. (4997)  
11 exp sanitation/ (417046)  
12 water contamination/ (31734)  
13 water quality/ (35785)  
14 water management/ (14735)  
15 water standard/ (2066)  
16 water supply/ (36094)  
17 water transport/ (9418)  
18 water treatment/ (16934)  
19 dirty water.ti,ab. (130)  
20 surface water.ti,ab. (13172)  
21 rainwater.ti,ab. (2495)  
22 (water adj4 (puri\* or floccul\* or stagna\* or contaminat\* or recontaminat\* or re-contaminat\*).ti,ab. (21776)  
23 (water adj3 (quality or chlor\* or coagulation or turbidity or microbiol\* or pipe? or standpipe? or pump\* or handpump\* or distance or connect\* or access\* or quantity or quantities or volume? or sediment\*).ti,ab. (62570)  
24 (water adj2 (saf\* or unsaf\* or filtr\* or filter\* or supply or store? or storage or drink\* or consum\* or distribut\*).ti,ab. (86107)  
25 (water adj1 (treat\* or improv\* or radiat\* or irradiat\* or reserve?).ti,ab. (18567)  
26 hygiene/ (42033)  
27 personal hygiene/ (4618)  
28 exp hand washing/ (12158)  
29 soap/ (5486)  
30 detergent/ (20477)  
31 hand sanitizer/ (366)  
32 (hand adj3 wash\*).ti,ab. (3544)  
33 handwash\*.ti,ab. (2012)  
34 soap?.ti,ab. (7913)  
35 detergent?.ti,ab. (44910)

36 hand-rub?.ti,ab. (791)  
37 handrub?.ti,ab. (257)  
38 hand gel?.ti,ab. (144)  
39 alcohol-based gel?.ti,ab. (34)  
40 alcohol-based rub.ti,ab. (8)  
41 wash\* facilit\*.ti,ab. (218)  
42 (water adj2 (laundry or wash\* or bath\*)).ti,ab. (10272)  
43 sink?.ti,ab. (13237)  
44 faucet?.ti,ab. (421)  
45 (tap or taps).ti,ab. (29465)  
46 bucket?.ti,ab. (1878)  
47 bowl?.ti,ab. (3027)  
48 waste water/ (22952)  
49 sewage/ (16840)  
50 solid waste/ (3480)  
51 exp hospital waste/ (2507)  
52 (waste adj4 (medical or solid? or product\* or water or sharp?  
or hazard\* or organic\* or food\* or lab\* or surg\* or biolog\* or  
contaminat\* or infect\*)).ti,ab. (33671)  
53 (wastewater or waste-water).ti,ab. (60864)  
54 (inanimate adj2 environment\*).ti,ab. (134)  
55 (sanitary or sanitation).ti,ab. (25805)  
56 toilet\*.ti,ab. (7940)  
57 latrine?.ti,ab. (1353)  
58 (potty or potties).ti,ab. (103)  
59 pit?.ti,ab. (22956)  
60 (privy or privies).ti,ab. (204)  
61 wc.ti,ab. (11710)  
62 water closet?.ti,ab. (63)  
63 pour flush.ti,ab. (13)  
64 shower?.ti,ab. (3059)  
65 sewerage.ti,ab. (1276)  
66 sewer?.ti,ab. (4275)  
67 septic tank?.ti,ab. (949)  
68 open defecation.ti,ab. (185)  
69 grease trap?.ti,ab. (40)  
70 (faeces adj3 (dispos\* or manag\* or service\* or collect\* or  
store\* or segregat\* or safe or treat\* or improv\* or microbiol\* or  
contaminat\* or recontaminat\* or re-contaminat\* or incinerat\* or  
burn\* or fire or compost\*)).ti,ab. (1555)  
71 (feces adj3 (dispos\* or manag\* or service\* or collect\* or  
store\* or segregat\* or safe or treat\* or improv\* or microbiol\* or  
contaminat\* or recontaminat\* or re-contaminat\* or incinerat\* or  
burn\* or fire or compost\*)).ti,ab. (2948)  
72 (faecal adj3 (dispos\* or manag\* or service\* or collect\* or  
store\* or segregat\* or safe or treat\* or improv\* or microbiol\* or  
contaminat\* or recontaminat\* or re-contaminat\* or incinerat\* or  
burn\* or fire or compost\*)).ti,ab. (4275)  
73 (fecal adj3 (dispos\* or manag\* or service\* or collect\* or  
store\* or segregat\* or safe or treat\* or improv\* or microbiol\* or  
contaminat\* or recontaminat\* or re-contaminat\* or incinerat\* or  
burn\* or fire or compost\*)).ti,ab. (8319)  
74 (excre\* adj3 (dispos\* or manag\* or service\* or collect\* or  
store\* or segregat\* or safe or treat\* or improv\* or microbiol\* or

contaminat\* or recontaminat\* or re-contaminat\* or incinerat\* or burn\* or fire or compost\*).ti,ab. (4601)

75 (defecat\* adj3 (dispos\* or manag\* or service\* or collect\* or store\* or segregat\* or safe or treat\* or improv\* or microbiol\* or contaminat\* or recontaminat\* or re-contaminat\* or incinerat\* or burn\* or fire or compost\*).ti,ab. (692)

76 (solids adj3 (dispos\* or manag\* or service\* or collect\* or store\* or segregat\* or safe or treat\* or improv\* or microbiol\* or contaminat\* or recontaminat\* or re-contaminat\* or incinerat\* or burn\* or fire or compost\*).ti,ab. (835)

77 (waste adj3 (dispos\* or manag\* or service\* or collect\* or store\* or segregat\* or safe or treat\* or improv\* or microbiol\* or contaminat\* or recontaminat\* or re-contaminat\* or incinerat\* or burn\* or fire or compost\*).ti,ab. (27444)

78 (garbage adj3 (dispos\* or manag\* or service\* or collect\* or store\* or segregat\* or safe or treat\* or improv\* or microbiol\* or contaminat\* or recontaminat\* or re-contaminat\* or incinerat\* or burn\* or fire or compost\*).ti,ab. (634)

79 (rubbish adj3 (dispos\* or manag\* or service\* or collect\* or store\* or segregat\* or safe or treat\* or improv\* or microbiol\* or contaminat\* or recontaminat\* or re-contaminat\* or incinerat\* or burn\* or fire or compost\*).ti,ab. (61)

80 (sharps adj3 (dispos\* or manag\* or service\* or collect\* or store\* or segregat\* or safe or treat\* or improv\* or microbiol\* or contaminat\* or recontaminat\* or re-contaminat\* or incinerat\* or burn\* or fire or compost\*).ti,ab. (385)

81 (softs adj3 (dispos\* or manag\* or service\* or collect\* or store\* or segregat\* or safe or treat\* or improv\* or microbiol\* or contaminat\* or recontaminat\* or re-contaminat\* or incinerat\* or burn\* or fire or compost\*).ti,ab. (0)

82 (dressing? adj3 (dispos\* or manag\* or service\* or collect\* or store\* or segregat\* or safe or treat\* or improv\* or microbiol\* or contaminat\* or recontaminat\* or re-contaminat\* or incinerat\* or burn\* or fire or compost\*).ti,ab. (3185)

83 (needle? adj3 (dispos\* or manag\* or service\* or collect\* or store\* or segregat\* or safe or treat\* or improv\* or microbiol\* or contaminat\* or recontaminat\* or re-contaminat\* or incinerat\* or burn\* or fire or compost\*).ti,ab. (5521)

84 (scalpel? adj3 (dispos\* or manag\* or service\* or collect\* or store\* or segregat\* or safe or treat\* or improv\* or microbiol\* or contaminat\* or recontaminat\* or re-contaminat\* or incinerat\* or burn\* or fire or compost\*).ti,ab. (218)

85 (food? adj3 (dispos\* or manag\* or service\* or collect\* or store\* or segregat\* or incinerat\* or burn\* or fire)).ti,ab. (7038)

86 (medical adj3 (dispos\* or collect\* or store\* or segregat\* or incinerat\* or burn\* or fire)).ti,ab. (13968)

87 (surg\* adj3 (dispos\* or collect\* or store\* or segregat\* or incinerat\* or burn\* or fire)).ti,ab. (10699)

88 (biolog\* adj3 (dispos\* or manag\* or collect\* or store\* or segregat\* or incinerat\* or burn\* or fire)).ti,ab. (5255)

89 (anatom\* adj3 (dispos\* or manag\* or collect\* or store\* or segregat\* or incinerat\* or burn\* or fire)).ti,ab. (2049)

90 (corpse? adj3 (dispos\* or manag\* or collect\* or store\* or segregat\* or incinerat\* or burn\* or fire)).ti,ab. (137)



91 (cadaver? adj3 (dispos\* or manag\* or collect\* or store\* or segregat\* or incinerat\* or burn\* or fire)).ti,ab. (338)

92 (bin or bins).ti,ab. (6534)

93 dustbin?.ti,ab. (96)

94 garbage can?.ti,ab. (60)

95 trash can?.ti,ab. (53)

96 personal protective equipment.ti,ab. (2437)

97 safety box\*.ti,ab. (30)

98 or/1-97 (1072688)

99 health care facility/ (65158)

100 exp hospital/ (1075409)

101 exp isolation facility/ (69)

102 clinical laboratory/ (20721)

103 hospital laboratory/ (4887)

104 rehabilitation center/ (13481)

105 assisted living facility/ (1953)

106 biobank/ (2087)

107 blood bank/ (12792)

108 bone bank/ (53)

109 cancer center/ (29467)

110 community mental health center/ (3531)

111 core laboratory/ (1145)

112 dental facility/ (3680)

113 eye bank/ (255)

114 health center/ (30805)

115 hospice/ (11152)

116 mental health center/ (5684)

117 milk bank/ (96)

118 morgue/ (80)

119 nursing home/ (50150)

120 pain clinic/ (3083)

121 poison center/ (4280)

122 residential home/ (6862)

123 secondary care center/ (797)

124 sperm bank/ (151)

125 student-run clinic/ (48)

126 tertiary care center/ (34896)

127 tissue bank/ (406)

128 hospital?.ti,ab. (1483787)

129 (care adj1 (clinic or facility or facilities or centre? or center? or institution? or ward? or setting? or service? or room? or unit? or theatre? or theater?)).ti,ab. (304423)

130 (healthcare adj1 (clinic or facility or facilities or centre? or center? or institution? or ward? or setting? or service? or room? or unit? or theatre? or theater?)).ti,ab. (24098)

131 ((health adj1 (clinic or facility or facilities or institution? or ward? or setting? or service? or room? or unit? or theatre? or theater?)) or health centre? or health center?).ti,ab. (170704)

132 (medic\* adj1 (clinic or facility or facilities or centre? or center? or institution? or ward? or setting? or service? or room? or unit? or theatre? or theater?)).ti,ab. (169250)

133 (nurs\* adj1 (clinic or facility or facilities or centre? or center? or institution? or ward? or setting? or service? or room? or

unit? or theatre? or theater?)).ti,ab. (18892)

134 (secondary adj1 (clinic or facility or facilities or centre? or center? or institution? or ward? or setting? or service? or room? or unit? or theatre? or theater?)).ti,ab. (1783)

135 (primary adj1 (clinic or facility or facilities or centre? or center? or institution? or ward? or setting? or service? or room? or unit? or theatre? or theater?)).ti,ab. (4725)

136 (tertiary adj1 (clinic or facility or facilities or centre? or center? or institution? or ward? or setting? or service? or room? or unit? or theatre? or theater?)).ti,ab. (23453)

137 (matern\* adj1 (clinic or facility or facilities or centre? or center? or institution? or ward? or setting? or service? or room? or unit? or theatre? or theater?)).ti,ab. (8179)

138 (birth\* adj1 (clinic or facility or facilities or centre? or center? or institution? or ward? or setting? or service? or room? or unit? or theatre? or theater?)).ti,ab. (1994)

139 ((dentist or dental) adj1 (clinic or facility or facilities or centre? or center? or institution? or ward? or setting? or service? or room? or unit? or theatre? or theater?)).ti,ab. (8717)

140 (neonat\* adj1 (clinic or facility or facilities or centre? or center? or institution? or ward? or setting? or service? or room? or unit? or theatre? or theater?)).ti,ab. (6709)

141 ((baby or babies) adj1 (clinic or facility or facilities or centre? or center? or institution? or ward? or setting? or service? or room? or unit? or theatre? or theater?)).ti,ab. (1354)

142 ((paediatric? or pediatric?) adj1 (clinic or facility or facilities or centre? or center? or institution? or ward? or setting? or service? or room? or unit? or theatre? or theater?)).ti,ab. (16186)

143 (geriatric? adj1 (clinic or facility or facilities or centre? or center? or institution? or ward? or setting? or service? or room? or unit? or theatre? or theater?)).ti,ab. (5283)

144 (outpatient? adj1 (clinic or facility or facilities or centre? or center? or institution? or ward? or setting? or service? or room? or unit? or theatre? or theater?)).ti,ab. (55266)

145 ((emergency or emergencies) adj1 (clinic or facility or facilities or centre? or center? or institution? or ward? or setting? or service? or room? or unit? or theatre? or theater?)).ti,ab. (46273)

146 (psychiatric adj1 (clinic or facility or facilities or centre? or center? or institution? or ward? or setting? or service? or room? or unit? or theatre? or theater?)).ti,ab. (19515)

147 (mental adj1 (clinic or facility or facilities or centre? or center? or institution? or ward? or setting? or service? or room? or unit? or theatre? or theater?)).ti,ab. (1058)

148 (rehab\* adj1 (clinic or facility or facilities or centre? or center? or institution? or ward? or setting? or service? or room? or unit? or theatre? or theater?)).ti,ab. (27340)

149 ((surgical or surgery or surgeries) adj1 (clinic or facility or facilities or centre? or center? or institution? or ward? or setting? or service? or room? or unit? or theatre? or theater?)).ti,ab. (33606)

150 (long stay? adj1 (clinic or facility or facilities or centre? or center? or institution? or ward? or setting? or service?

or room? or unit? or theatre? or theater?)).ti,ab. (429)

151 (acute adj1 (clinic or facility or facilities or centre? or center? or institution? or ward? or setting? or service? or room? or unit? or theatre? or theater?)).ti,ab. (6455)

152 (sub-acute adj3 (clinic or facil\* or centre? or center? or institut\* or ward? or setting? or service? or room? or unit? or theatre? or theater?)).ti,ab. (242)

153 (subacute adj1 (clinic or facility or facilities or centre? or center? or institution? or ward? or setting? or service? or room? or unit? or theatre? or theater?)).ti,ab. (269)

154 icu.ti,ab. (90879)

155 nicu.ti,ab. (13765)

156 (burn? adj1 (clinic or facility or facilities or centre? or center? or institution? or ward? or setting? or service? or room? or unit? or theatre? or theater?)).ti,ab. (6164)

157 (stroke? adj1 (clinic or facility or facilities or centre? or center? or institution? or ward? or setting? or service? or room? or unit? or theatre? or theater?)).ti,ab. (11163)

158 (coronary adj1 (clinic or facility or facilities or centre? or center? or institution? or ward? or setting? or service? or room? or unit? or theatre? or theater?)).ti,ab. (925)

159 (recovery adj1 (clinic or facility or facilities or centre? or center? or institution? or ward? or setting? or service? or room? or unit? or theatre? or theater?)).ti,ab. (6025)

160 (respiratory adj1 (clinic or facility or facilities or centre? or center? or institution? or ward? or setting? or service? or room? or unit? or theatre? or theater?)).ti,ab. (4631)

161 (operating adj1 (clinic or facility or facilities or centre? or center? or institution? or ward? or setting? or service? or room? or unit? or theatre? or theater?)).ti,ab. (40260)

162 (delivery adj1 (clinic or facility or facilities or centre? or center? or institution? or ward? or setting? or room? or unit? or theatre? or theater?)).ti,ab. (5167)

163 facility birth.ti,ab. (64)

164 facility-based.ti,ab. (2155)

165 facility-care.ti,ab. (193)

166 (mortuary or mortuaries).ti,ab. (1061)

167 health care personnel/ (135256)

168 exp anesthetist/ (28413)

169 exp hospital personnel/ (96757)

170 exp medical personnel/ (829536)

171 mental health care personnel/ (1668)

172 healthcare worker?.ti,ab. (9976)

173 health-care worker?.ti,ab. (13695)

174 hcw.ti,ab. (2204)

175 nurse?.ti,ab. (281151)

176 doctor?.ti,ab. (157989)

177 physician?.ti,ab. (492182)

178 surgeon?.ti,ab. (277823)

179 (anaesthetist? or anesthetist? or anesthesiologist?).ti,ab. (44448)

180 dentist?.ti,ab. (33866)

181 physiotherapist?.ti,ab. (13455)

182 physical therapist?.ti,ab. (7678)

183 dietician?.ti,ab. (3533)  
184 occupational therapist?.ti,ab. (8219)  
185 psychiatrist?.ti,ab. (38471)  
186 mortician?.ti,ab. (40)  
187 coroner?.ti,ab. (2871)  
188 or/99-187 (3864634)  
189 developing country/ (90148)  
190 low income country/ (2261)  
191 middle income country/ (2962)  
192 ((developing or less\* developed or under developed or underdeveloped or middle income or low\* income or underserved or under served or deprived or poor\*) adj (economy or economies)).ti,ab. (655)  
193 ((developing or less\* developed or under developed or underdeveloped or middle income or low\* income or underserved or under served or deprived or poor\*) adj (countr\* or nation? or population? or world)).ti,ab. (104110)  
194 (low\* adj (gdp or gnp or gross domestic or gross national)).ti,ab. (310)  
195 (low adj3 middle adj3 countr\*).ti,ab. (11708)  
196 (lmic or lmics or third world or lami countr\*).ti,ab. (6548)  
197 transitional countr\*.ti,ab. (202)  
198 global south.ti,ab. (223)  
199 "Africa south of the Sahara"/ (12100)  
200 ("africa south of the sahara" or sub-saharan africa or central africa or eastern africa or southern africa or western africa).ti,ab. (27352)  
201 Botswana/ (2189)  
202 (Botswana or Bechuanaland or Kalahari).ti,ab. (2370)  
203 Equatorial Guinea/ (392)  
204 (Equatorial Guinea or Spanish Guinea).ti,ab. (485)  
205 Gabon/ (1597)  
206 (Gabon or Gabonese Republic).ti,ab. (1752)  
207 Mauritius/ (795)  
208 (Mauritius or Agalega Islands).ti,ab. (930)  
209 Namibia/ (1305)  
210 Namibia.ti,ab. (1334)  
211 South Africa/ (45562)  
212 South Africa.ti,ab. (33026)  
213 Angola/ (1270)  
214 angola.ti,ab. (1350)  
215 Cameroon/ (6096)  
216 Cameroon.ti,ab. (6677)  
217 Cape Verde/ (284)  
218 (Cape Verde or Cabo Verde).ti,ab. (518)  
219 Congo/ (3571)  
220 (congo not ((democratic republic adj3 congo) or congo red or crimean-congo)).ti,ab. (3053)  
221 Cote d'Ivoire/ (2980)  
222 (Cote d'Ivoire or Ivory Coast).ti,ab. (3865)  
223 Ghana/ (9381)  
224 (Ghana or Gold Coast).ti,ab. (9858)  
225 Kenya/ (18267)  
226 kenya.mp. (21741)

227 Lesotho/ (569)  
228 (Lesotho or Basutoland).ti,ab. (636)  
229 Mauritania/ (564)  
230 Mauritania.ti,ab. (586)  
231 Nigeria/ (34268)  
232 Nigeria.ti,ab. (30963)  
233 "Sao Tome and Principe"/ (61)  
234 (sao tome adj2 principe).ti,ab. (128)  
235 Sudan/ (6719)  
236 (Sudan not south sudan).ti,ab. (8994)  
237 Swaziland/ (792)  
238 Swaziland.ti,ab. (812)  
239 Zambia/ (5362)  
240 (Zambia or Northern Rhodesia).ti,ab. (5032)  
241 Benin/ (2126)  
242 (Benin or Dahomey).ti,ab. (4214)  
243 Burkina Faso/ (3693)  
244 (Burkina Faso or Burkina Fasso or Upper Volta).ti,ab. (4294)  
245 Burundi/ (741)  
246 Burundi.ti,ab. (764)  
247 Central African Republic/ (825)  
248 (Central African Republic or Ubangi-Shari).ti,ab. (988)  
249 Chad/ (918)  
250 Chad.ti,ab. (1221)  
251 Comoros/ (280)  
252 (Comoros or Comoro Islands or Mayotte or Iles  
Comores).ti,ab. (529)  
253 "Democratic Republic Congo"/ (3528)  
254 ((democratic republic adj2 congo) or belgian congo or  
zaire).ti,ab. (4368)  
255 Eritrea/ (472)  
256 Eritrea.ti,ab. (554)  
257 Ethiopia/ (12815)  
258 Ethiopia.ti,ab. (11852)  
259 Gambia/ (2594)  
260 Gambia.ti,ab. (2308)  
261 Guinea/ (2464)  
262 (Guinea not (New Guinea or Guinea Pig\* or Guinea  
Fowl)).ti,ab. (4176)  
263 Guinea-Bissau/ (966)  
264 (Guinea-Bissau or Portuguese Guinea).ti,ab. (1001)  
265 Liberia/ (1541)  
266 Liberia.ti,ab. (1523)  
267 Madagascar/ (4020)  
268 (Madagascar or Malagasy Republic).ti,ab. (4638)  
269 Malawi/ (5991)  
270 (Malawi or Nyasaland).ti,ab. (6309)  
271 Mali/ (3050)  
272 Mali.ti,ab. (3760)  
273 Mozambique/ (3039)  
274 (Mozambique or Mocambique or Portuguese East Africa).ti,ab.  
(3331)  
275 Niger/ (2081)  
276 (Niger not (Aspergillus or Peptococcus or Schizothorax or

Cruciferae or Gobius or Lasius or Agelastes or Melanosuchus or radish or Parastromateus or Orius or Apergillus or Parastromateus or Stomoxys)).ti,ab. (3787)

- 277 Rwanda/ (2866)
- 278 (Rwanda or Ruanda).ti,ab. (2791)
- 279 Senegal/ (6366)
- 280 senegal.ti,ab. (6120)
- 281 Sierra Leone/ (1946)
- 282 Sierra Leone.mp. (2526)
- 283 exp Somalia/ (1784)
- 284 Somalia.ti,ab. (1279)
- 285 South Sudan/ (160)
- 286 south sudan.ti,ab. (464)
- 287 Tanzania/ (13080)
- 288 (Tanzania or Tanganyika or Zanzibar).ti,ab. (13057)
- 289 Togo/ (1256)
- 290 (Togo or Togolese Republic).ti,ab. (1443)
- 291 Uganda/ (15399)
- 292 Uganda.ti,ab. (14208)
- 293 Zimbabwe/ (6260)
- 294 (Zimbabwe or Rhodesia).ti,ab. (5635)
- 295 Maldives/ (215)
- 296 Maldives.ti,ab. (248)
- 297 Algeria/ (4296)
- 298 Algeria.ti,ab. (4149)
- 299 Iran/ (41271)
- 300 Iran.ti,ab. (41873)
- 301 exp Iraq/ (7108)
- 302 Iraq.ti,ab. (7374)
- 303 Jordan/ (5474)
- 304 Jordan.ti,ab. (6523)
- 305 Lebanon/ (4848)
- 306 Lebanon.ti,ab. (4424)
- 307 Libyan Arab Jamahiriya/ (1567)
- 308 Libya.ti,ab. (1349)
- 309 Argentina/ (19579)
- 310 Argentina.ti,ab. (18664)
- 311 Belize/ (691)
- 312 Belize.ti,ab. (758)
- 313 exp Brazil/ (95783)
- 314 Brazil.ti,ab. (83658)
- 315 Colombia/ (15719)
- 316 Colombia.ti,ab. (13189)
- 317 Costa Rica/ (4348)
- 318 Costa Rica.ti,ab. (4542)
- 319 Cuba/ (6517)
- 320 Cuba.ti,ab. (5426)
- 321 Dominica/ (146)
- 322 Dominica.ti,ab. (450)
- 323 Dominican Republic/ (2121)
- 324 Dominican Republic.ti,ab. (1912)
- 325 Ecuador/ (4370)
- 326 Ecuador.ti,ab. (4261)
- 327 Grenada/ (199)

328 Grenada.ti,ab. (304)  
329 Guyana/ (849)  
330 Guyana.mp. (1367)  
331 Jamaica/ (3986)  
332 Jamaica.ti,ab. (3594)  
333 Mexico/ (41902)  
334 Mexico.ti,ab. (44340)  
335 exp Panama/ (2908)  
336 Panama.ti,ab. (3793)  
337 Paraguay/ (1257)  
338 Paraguay.mp. (1872)  
339 Peru/ (10402)  
340 Peru.ti,ab. (10677)  
341 Saint Lucia/ (112)  
342 (St Lucia or Saint Lucia).ti,ab. (352)  
343 "Saint Vincent and the Grenadines"/ (63)  
344 Grenadines.ti,ab. (62)  
345 Suriname/ (1147)  
346 Suriname.ti,ab. (569)  
347 Venezuela/ (6374)  
348 Venezuela.ti,ab. (6043)  
349 Albania/ (1607)  
350 Albania.ti,ab. (1445)  
351 Azerbaijan/ (1632)  
352 Azerbaijan.ti,ab. (1666)  
353 Belarus/ (2603)  
354 (belarus or byelarus or belorussia).ti,ab. (1989)  
355 exp "Bosnia and Herzegovina"/ (2380)  
356 (bosnia or herzegovina).ti,ab. (2602)  
357 Bulgaria/ (9080)  
358 Bulgaria.ti,ab. (6003)  
359 Croatia/ (8956)  
360 croatia.ti,ab. (8494)  
361 Kazakhstan/ (3333)  
362 (Kazakhstan or kazakh).ti,ab. (3200)  
363 "Macedonia (Republic)"/ (1003)  
364 Macedonia.ti,ab. (1693)  
365 "Montenegro (republic)"/ (610)  
366 Montenegro.ti,ab. (1003)  
367 Romania/ (13165)  
368 Romania.ti,ab. (7802)  
369 exp Russian Federation/ (59101)  
370 USSR/ (48160)  
371 (Russia or Russian Federation or USSR or Union of Soviet  
Socialist Republics or Soviet Union).ti,ab. (32117)  
372 exp Serbia/ (4834)  
373 serbia.ti,ab. (5713)  
374 "Turkey (republic)"/ (32362)  
375 turkey.ti,ab. not animal/ (37150)  
376 Turkmenistan/ (583)  
377 Turkmenistan.ti,ab. (311)  
378 Yugoslavia/ (9579)  
379 yugoslavia.ti,ab. (2880)  
380 exp Samoan Islands/ (872)

381 american samoa.ti,ab. (365)  
382 exp China/ (177697)  
383 china.ti,ab. (154753)  
384 Fiji/ (1222)  
385 fiji.ti,ab. (1671)  
386 Malaysia/ (19129)  
387 malaysia.ti,ab. (16805)  
388 Marshall Islands/ (152)  
389 marshall islands.ti,ab. (327)  
390 Nauru/ (60)  
391 nauru.ti,ab. (149)  
392 ("independent state of samoa" or (samoa not american samoa)  
or western samoa or navigator islands or samoan islands).ti,ab.  
(551)  
393 Thailand/ (29971)  
394 Thailand.ti,ab. (27060)  
395 Tonga/ (329)  
396 tonga.ti,ab. (426)  
397 Tuvalu/ (36)  
398 Tuvalu.ti,ab. (52)  
399 Bangladesh/ (13674)  
400 Bangladesh.ti,ab. (13400)  
401 Bhutan/ (589)  
402 Bhutan.ti,ab. (574)  
403 exp India/ (131948)  
404 India.ti,ab. (111538)  
405 exp Pakistan/ (23049)  
406 Pakistan.ti,ab. (19561)  
407 Sri Lanka/ (7426)  
408 Sri Lanka.ti,ab. (6310)  
409 Djibouti/ (303)  
410 (Djibouti or French Somaliland).ti,ab. (383)  
411 Egypt/ (18826)  
412 Egypt.ti,ab. (16078)  
413 Jordan/ (5474)  
414 Jordan.ti,ab. (6523)  
415 Morocco/ (6841)  
416 Morocco.ti,ab. (6259)  
417 Syrian Arab Republic/ (2134)  
418 (Syria or Syrian Arab Republic).ti,ab. (1875)  
419 Tunisia/ (8822)  
420 tunisia.ti,ab. (7299)  
421 Palestine/ (1425)  
422 Gaza.ti,ab. (1010)  
423 Yemen/ (1790)  
424 Yemen.ti,ab. (1819)  
425 Bolivia/ (3181)  
426 Bolivia.ti,ab. (3278)  
427 El Salvador/ (1650)  
428 El Salvador.ti,ab. (1357)  
429 Guatemala/ (3986)  
430 Guatemala.ti,ab. (3673)  
431 Honduras/ (1687)  
432 Honduras.ti,ab. (1754)



433 Nicaragua/ (2004)  
434 Nicaragua.ti,ab. (1980)  
435 Armenia/ (1747)  
436 Armenia.ti,ab. (1277)  
437 "Georgia (Republic)"/ (1730)  
438 Kosovo/ (350)  
439 Kosovo.ti,ab. (1068)  
440 Kyrgyzstan/ (1432)  
441 (kyrgyzstan or kyrgyz republic or kirghizia or kirghiz).ti,ab. (1029)  
442 Moldova/ (1021)  
443 Moldova.ti,ab. (747)  
444 Tajikistan/ (833)  
445 tajikistan.ti,ab. (558)  
446 exp Ukraine/ (15496)  
447 Ukraine.ti,ab. (5517)  
448 Uzbekistan/ (2035)  
449 Uzbekistan.ti,ab. (1275)  
450 Cambodia/ (4265)  
451 cambodia.ti,ab. (3849)  
452 exp Indonesia/ (14156)  
453 indonesia.ti,ab. (12818)  
454 Kiribati/ (83)  
455 Kiribati.ti,ab. (145)  
456 Laos/ (1874)  
457 (laos or (lao adj1 democratic republic)).ti,ab. (1701)  
458 "Marshall Islands"/ (152)  
459 "Federated States of Micronesia"/ (901)  
460 (marshall island\* or caroline island\* or ellice island\* or gilbert island\* or johnston island\* or mariana island\* or micronesia).ti,ab. (1160)  
461 Mongolia/ (2727)  
462 mongolia.ti,ab. (3805)  
463 Myanmar/ (3003)  
464 (myanmar or burma).ti,ab. (3525)  
465 Papua New Guinea/ (6274)  
466 Papua New Guinea.ti,ab. (4494)  
467 Philippines/ (10383)  
468 Philippines.ti,ab. (8460)  
469 Timor-Leste/ (454)  
470 Timor-Leste.ti,ab. (277)  
471 Vanuatu/ (375)  
472 Vanuatu.ti,ab. (573)  
473 Viet Nam/ (14309)  
474 (Viet Nam or vietnam).ti,ab. (14797)  
475 Afghanistan/ (5228)  
476 Afghanistan.ti,ab. (5908)  
477 Nepal/ (9546)  
478 Nepal.ti,ab. (9156)  
479 Haiti/ (3629)  
480 Haiti.ti,ab. (3191)  
481 "North Korea"/ (465)  
482 (north korea or (democratic people\* republic adj2 korea)).ti,ab. (371)

483 or/189-482 [ALL LMICs] (1502920)  
484 98 and 188 and 483 (24684)  
485 humans/ (13058728)  
486 animals/ (1694022)  
487 485 and 486 (354189)  
488 486 not 487 (1339833)  
489 484 not 488 (24598)  
490 limit 489 to yr="1970 -Current" (24021)  
491 (editorial or letter or note).pt. (2293961)  
492 490 not 491 (23271)  
493 limit 492 to english language (20467)

#### OvidSP Global Health

Dates of database coverage: 1910 to 2018 week 15  
Date searched: 24/04/2018

1 disease control/ (42430)  
2 infection control/ (8067)  
3 decontamination/ (3605)  
4 disinfection/ (9623)  
5 disinfectants/ (6716)  
6 infect\* control\*.ti,ab. (9922)  
7 (disease adj1 control\*).ti,ab. (15676)  
8 (environ\* adj3 contaminat\*).ti,ab. (4440)  
9 sterili#at\*.ti,ab. (7213)  
10 decontaminat\*.ti,ab. (4806)  
11 disinfect\*.ti,ab. (16397)  
12 (clean or cleans or cleaned or cleaning).ti,ab. (25370)  
13 autoclave?.ti,ab. (3284)  
14 sanitation/ (10139)  
15 drinking water/ (29387)  
16 tap water/ (2123)  
17 water treatment plants/ (934)  
18 water microbiology/ (1132)  
19 water quality/ (31771)  
20 water supply/ (13603)  
21 plumbing/ (4)  
22 water availability/ (478)  
23 water distribution systems/ (1424)  
24 dirty water.ti,ab. (134)  
25 surface water.ti,ab. (5596)  
26 rainwater.ti,ab. (1053)  
27 rain-water.ti,ab. (677)  
28 (water adj4 (puri\* or floccul\* or stagna\* or contaminat\* or recontaminat\* or re-contaminat\*).ti,ab. (12669)  
29 (water adj3 (quality or chlor\* or coagulation or turbidity or microbiol\* or pipe? or standpipe? or pump\* or handpump\* or distance or connect\* or access\* or quantity or quantities or volume? or sediment\*).ti,ab. (29753)  
30 (water adj2 (safe\* or unsafe\* or filtr\* or filter\* or supply or store? or storage or drink\* or consum\* or distribut\*).ti,ab. (47847)  
31 (water adj1 (treat\* or improv\* or radiat\* or irradiat\* or

reserve?)).ti,ab. (9624)  
32 exp hygiene/ (47449)  
33 detergents/ (1401)  
34 soaps/ (654)  
35 washing/ (1937)  
36 hygien\*.ti,ab. (39842)  
37 (hand adj3 wash\*).ti,ab. (1858)  
38 handwash\*.ti,ab. (921)  
39 soap?.ti,ab. (4006)  
40 detergent?.ti,ab. (5098)  
41 hand-rub?.ti,ab. (371)  
42 handrub?.ti,ab. (93)  
43 hand gel?.ti,ab. (59)  
44 alcohol-based gel?.ti,ab. (19)  
45 alcohol-based rub.ti,ab. (2)  
46 wash\* facilit\*.ti,ab. (255)  
47 (water adj2 (laundry or wash\* or bath\*)).ti,ab. (4585)  
48 sink?.ti,ab. (1568)  
49 faucet?.ti,ab. (192)  
50 (tap or taps).ti,ab. (8596)  
51 bucket?.ti,ab. (795)  
52 bowl?.ti,ab. (803)  
53 wastewater/ (25577)  
54 wastewater treatment/ (19979)  
55 hospital wastes/ (750)  
56 exp waste disposal/ (7199)  
57 waste management/ (6167)  
58 exp waste treatment/ (25038)  
59 exp wastes/ (57392)  
60 (waste adj4 (medical or solid? or product\* or water or sharp?  
or hazard\* or organic\* or food\* or lab\* or surg\* or biolog\* or  
contaminat\* or infect\*)).ti,ab. (14937)  
61 (wastewater or waste-water).ti,ab. (22743)  
62 (inanimate adj2 environment\*).ti,ab. (56)  
63 sanita\*.ti,ab. (24426)  
64 toilet\*.ti,ab. (2445)  
65 latrine?.ti,ab. (2354)  
66 (potty or potties).ti,ab. (17)  
67 pit?.ti,ab. (5618)  
68 (privy or privies).ti,ab. (400)  
69 wc.ti,ab. (3612)  
70 water closet?.ti,ab. (152)  
71 pour flush.ti,ab. (25)  
72 shower?.ti,ab. (1025)  
73 sewerage.ti,ab. (1171)  
74 sewer?.ti,ab. (2735)  
75 septic tank?.ti,ab. (1171)  
76 open defecation.ti,ab. (201)  
77 grease trap?.ti,ab. (47)  
78 (faeces adj3 (dispos\* or manag\* or service\* or collect\* or  
store\* or segregat\* or safe or treat\* or improv\* or microbiol\* or  
contaminat\* or recontaminat\* or re-contaminat\* or incinerat\* or  
burn\* or fire or compost\*)).ti,ab. (3131)  
79 (feces adj3 (dispos\* or manag\* or service\* or collect\* or

store\* or segregat\* or safe or treat\* or improv\* or microbiol\* or  
contaminat\* or recontaminat\* or re-contaminat\* or incinerat\* or  
burn\* or fire or compost\*).ti,ab. (821)

80 (faecal adj3 (dispos\* or manag\* or service\* or collect\* or  
store\* or segregat\* or safe or treat\* or improv\* or microbiol\* or  
contaminat\* or recontaminat\* or re-contaminat\* or incinerat\* or  
burn\* or fire or compost\*).ti,ab. (4347)

81 (fecal adj3 (dispos\* or manag\* or service\* or collect\* or  
store\* or segregat\* or safe or treat\* or improv\* or microbiol\* or  
contaminat\* or recontaminat\* or re-contaminat\* or incinerat\* or  
burn\* or fire or compost\*).ti,ab. (2744)

82 (excre\* adj3 (dispos\* or manag\* or service\* or collect\* or  
store\* or segregat\* or safe or treat\* or improv\* or microbiol\* or  
contaminat\* or recontaminat\* or re-contaminat\* or incinerat\* or  
burn\* or fire or compost\*).ti,ab. (1773)

83 (defecat\* adj3 (dispos\* or manag\* or service\* or collect\* or  
store\* or segregat\* or safe or treat\* or improv\* or microbiol\* or  
contaminat\* or recontaminat\* or re-contaminat\* or incinerat\* or  
burn\* or fire or compost\*).ti,ab. (88)

84 (solids adj3 (dispos\* or manag\* or service\* or collect\* or  
store\* or segregat\* or safe or treat\* or improv\* or microbiol\* or  
contaminat\* or recontaminat\* or re-contaminat\* or incinerat\* or  
burn\* or fire or compost\*).ti,ab. (259)

85 (waste adj3 (dispos\* or manag\* or service\* or collect\* or  
store\* or segregat\* or safe or treat\* or improv\* or microbiol\* or  
contaminat\* or recontaminat\* or re-contaminat\* or incinerat\* or  
burn\* or fire or compost\*).ti,ab. (10356)

86 (garbage adj3 (dispos\* or manag\* or service\* or collect\* or  
store\* or segregat\* or safe or treat\* or improv\* or microbiol\* or  
contaminat\* or recontaminat\* or re-contaminat\* or incinerat\* or  
burn\* or fire or compost\*).ti,ab. (430)

87 (rubbish adj3 (dispos\* or manag\* or service\* or collect\* or  
store\* or segregat\* or safe or treat\* or improv\* or microbiol\* or  
contaminat\* or recontaminat\* or re-contaminat\* or incinerat\* or  
burn\* or fire or compost\*).ti,ab. (84)

88 (sharps adj3 (dispos\* or manag\* or service\* or collect\* or  
store\* or segregat\* or safe or treat\* or improv\* or microbiol\* or  
contaminat\* or recontaminat\* or re-contaminat\* or incinerat\* or  
burn\* or fire or compost\*).ti,ab. (127)

89 (softs adj3 (dispos\* or manag\* or service\* or collect\* or  
store\* or segregat\* or safe or treat\* or improv\* or microbiol\* or  
contaminat\* or recontaminat\* or re-contaminat\* or incinerat\* or  
burn\* or fire or compost\*).ti,ab. (0)

90 (dressing? adj3 (dispos\* or manag\* or service\* or collect\* or  
store\* or segregat\* or safe or treat\* or improv\* or microbiol\* or  
contaminat\* or recontaminat\* or re-contaminat\* or incinerat\* or  
burn\* or fire or compost\*).ti,ab. (377)

91 (needle? adj3 (dispos\* or manag\* or service\* or collect\* or  
store\* or segregat\* or safe or treat\* or improv\* or microbiol\* or  
contaminat\* or recontaminat\* or re-contaminat\* or incinerat\* or  
burn\* or fire or compost\*).ti,ab. (643)

92 (scalpel? adj3 (dispos\* or manag\* or service\* or collect\* or  
store\* or segregat\* or safe or treat\* or improv\* or microbiol\* or  
contaminat\* or recontaminat\* or re-contaminat\* or incinerat\* or

burn\* or fire or compost\*).ti,ab. (12)  
93 (food? adj3 (dispos\* or manag\* or collect\* or store\* or segregat\* or incinerat\* or burn\* or fire)).ti,ab. (7009)  
94 (medical adj3 (dispos\* or collect\* or store\* or segregat\* or incinerat\* or burn\* or fire)).ti,ab. (2097)  
95 (surg\* adj3 (dispos\* or collect\* or store\* or segregat\* or incinerat\* or burn\* or fire)).ti,ab. (634)  
96 (biolog\* adj3 (dispos\* or manag\* or collect\* or store\* or segregat\* or incinerat\* or burn\* or fire)).ti,ab. (921)  
97 (anatom\* adj3 (dispos\* or manag\* or collect\* or store\* or segregat\* or incinerat\* or burn\* or fire)).ti,ab. (76)  
98 (corpse? adj3 (dispos\* or manag\* or collect\* or store\* or segregat\* or incinerat\* or burn\* or fire)).ti,ab. (46)  
99 (cadaver? adj3 (dispos\* or manag\* or collect\* or store\* or segregat\* or incinerat\* or burn\* or fire)).ti,ab. (25)  
100 (bin or bins).ti,ab. (864)  
101 dustbin?.ti,ab. (72)  
102 garbage can?.ti,ab. (44)  
103 trash.ti,ab. (304)  
104 personal protective equipment.ti,ab. (1085)  
105 safety box\*.ti,ab. (18)  
106 or/1-105 (344169)  
107 exp hospitals/ (38604)  
108 exp health centres/ (12790)  
109 nursing homes/ (3996)  
110 hospital?.ti,ab. (227027)  
111 (care adj1 (clinic or facility or facilities or centre? or center? or institution? or ward? or setting? or service? or room? or unit? or theatre? or theater?)).ti,ab. (45296)  
112 (healthcare adj1 (clinic or facility or facilities or centre? or center? or institution? or ward? or setting? or service? or room? or unit? or theatre? or theater?)).ti,ab. (5807)  
113 ((health adj1 (clinic or facility or facilities or institution? or ward? or setting? or service? or room? or unit? or theatre? or theater?)) or health centre? or health center?).ti,ab. (47613)  
114 (medic\* adj1 (clinic or facility or facilities or centre? or center? or institution? or ward? or setting? or service? or room? or unit? or theatre? or theater?)).ti,ab. (21336)  
115 (nurs\* adj1 (clinic or facility or facilities or centre? or center? or institution? or ward? or setting? or service? or room? or unit? or theatre? or theater?)).ti,ab. (1304)  
116 (secondary adj1 (clinic or facility or facilities or centre? or center? or institution? or ward? or setting? or service? or room? or unit? or theatre? or theater?)).ti,ab. (212)  
117 (primary adj1 (clinic or facility or facilities or centre? or center? or institution? or ward? or setting? or service? or room? or unit? or theatre? or theater?)).ti,ab. (634)  
118 (tertiary adj1 (clinic or facility or facilities or centre? or center? or institution? or ward? or setting? or service? or room? or unit? or theatre? or theater?)).ti,ab. (1559)  
119 (matern\* adj1 (clinic or facility or facilities or centre? or center? or institution? or ward? or setting? or service? or room? or unit? or theatre? or theater?)).ti,ab. (2375)

120 (birth\* adj1 (clinic or facility or facilities or centre? or center? or institution? or ward? or setting? or service? or room? or unit? or theatre? or theater?)).ti,ab. (388)

121 ((dentist or dental) adj1 (clinic or facility or facilities or centre? or center? or institution? or ward? or setting? or service? or room? or unit? or theatre? or theater?)).ti,ab. (1760)

122 (neonat\* adj1 (clinic or facility or facilities or centre? or center? or institution? or ward? or setting? or service? or room? or unit? or theatre? or theater?)).ti,ab. (1346)

123 ((baby or babies) adj1 (clinic or facility or facilities or centre? or center? or institution? or ward? or setting? or service? or room? or unit? or theatre? or theater?)).ti,ab. (414)

124 ((paediatric? or pediatric?) adj1 (clinic or facility or facilities or centre? or center? or institution? or ward? or setting? or service? or room? or unit? or theatre? or theater?)).ti,ab. (2792)

125 (geriatric? adj1 (clinic or facility or facilities or centre? or center? or institution? or ward? or setting? or service? or room? or unit? or theatre? or theater?)).ti,ab. (525)

126 (outpatient? adj1 (clinic or facility or facilities or centre? or center? or institution? or ward? or setting? or service? or room? or unit? or theatre? or theater?)).ti,ab. (5161)

127 ((emergency or emergencies) adj1 (clinic or facility or facilities or centre? or center? or institution? or ward? or setting? or service? or room? or unit? or theatre? or theater?)).ti,ab. (3899)

128 (psychiatric adj1 (clinic or facility or facilities or centre? or center? or institution? or ward? or setting? or service? or room? or unit? or theatre? or theater?)).ti,ab. (779)

129 (mental adj1 (clinic or facility or facilities or centre? or center? or institution? or ward? or setting? or service? or room? or unit? or theatre? or theater?)).ti,ab. (193)

130 (rehab\* adj1 (clinic or facility or facilities or centre? or center? or institution? or ward? or setting? or service? or room? or unit? or theatre? or theater?)).ti,ab. (1604)

131 ((surgical or surgery or surgeries) adj1 (clinic or facility or facilities or centre? or center? or institution? or ward? or setting? or service? or room? or unit? or theatre? or theater?)).ti,ab. (2903)

132 (long stay? adj1 (clinic or facility or facilities or centre? or center? or institution? or ward? or setting? or service? or room? or unit? or theatre? or theater?)).ti,ab. (65)

133 (acute adj1 (clinic or facility or facilities or centre? or center? or institution? or ward? or setting? or service? or room? or unit? or theatre? or theater?)).ti,ab. (273)

134 (sub-acute adj1 (clinic or facility or facilities or centre? or center? or institution? or ward? or setting? or service? or room? or unit? or theatre? or theater?)).ti,ab. (4)

135 (subacute adj1 (clinic or facility or facilities or centre? or center? or institution? or ward? or setting? or service? or room? or unit? or theatre? or theater?)).ti,ab. (9)

136 icu.ti,ab. (9295)

137 nicu.ti,ab. (1815)

138 (burn? adj1 (clinic or facility or facilities or centre? or

center? or institution? or ward? or setting? or service? or room? or unit? or theatre? or theater?)).ti,ab. (857)

139 (stroke? adj1 (clinic or facility or facilities or centre? or center? or institution? or ward? or setting? or service? or room? or unit? or theatre? or theater?)).ti,ab. (190)

140 (coronary adj1 (clinic or facility or facilities or centre? or center? or institution? or ward? or setting? or service? or room? or unit? or theatre? or theater?)).ti,ab. (29)

141 (recovery adj1 (clinic or facility or facilities or centre? or center? or institution? or ward? or setting? or service? or room? or unit? or theatre? or theater?)).ti,ab. (251)

142 (respiratory adj1 (clinic or facility or facilities or centre? or center? or institution? or ward? or setting? or service? or room? or unit? or theatre? or theater?)).ti,ab. (350)

143 (operating adj1 (clinic or facility or facilities or centre? or center? or institution? or ward? or setting? or service? or room? or unit? or theatre? or theater?)).ti,ab. (1716)

144 (delivery adj1 (clinic or facility or facilities or centre? or center? or institution? or ward? or setting? or room? or unit? or theatre? or theater?)).ti,ab. (741)

145 facility birth.ti,ab. (32)

146 facility-based.ti,ab. (1095)

147 facility-care.ti,ab. (35)

148 (mortuary or mortuaries).ti,ab. (182)

149 exp health care workers/ (61576)

150 healthcare worker?.ti,ab. (3497)

151 health-care worker?.ti,ab. (5323)

152 hcw.ti,ab. (949)

153 nurse?.ti,ab. (21716)

154 doctor?.ti,ab. (21199)

155 physician?.ti,ab. (36795)

156 surgeon?.ti,ab. (7028)

157 (anaesthetist? or anesthetist? or anesthesiologist?).ti,ab. (930)

158 dentist?.ti,ab. (3199)

159 physiotherapist?.ti,ab. (486)

160 physical therapist?.ti,ab. (130)

161 dietician?.ti,ab. (686)

162 occupational therapist?.ti,ab. (170)

163 psychiatrist?.ti,ab. (1279)

164 mortician?.ti,ab. (7)

165 coroner?.ti,ab. (345)

166 or/107-165 (395217)

167 developing countries/ (852067)

168 least developed countries/ (110066)

169 ((developing or less\* developed or under developed or underdeveloped or middle income or low\* income or underserved or under served or deprived or poor\*) adj (economy or economies)).ti,ab. (267)

170 ((developing or less\* developed or under developed or underdeveloped or middle income or low\* income or underserved or under served or deprived or poor\*) adj (countr\* or nation? or population? or world)).ti,ab. (46988)

171 (low\* adj (gdp or gnp or gross domestic or gross

national)).ti,ab. (64)  
172 (low adj3 middle adj3 countr\*).ti,ab. (5465)  
173 (lmic or lmics or third world or lami countr\*).ti,ab. (2478)  
174 transitional countr\*.ti,ab. (91)  
175 global south.ti,ab. (134)  
176 exp "africa south of sahara"/ (187391)  
177 ("africa south of the sahara" or sub-saharan africa or  
central africa or eastern africa or southern africa or western  
africa).ti,ab. (16742)  
178 korea democratic people's republic/ (271)  
179 (north korea or (democratic people\* republic adj2  
korea)).ti,ab. (184)  
180 cambodia/ (2632)  
181 cambodia.ti,ab. (2490)  
182 exp indonesia/ (12040)  
183 indonesia.ti,ab. (7379)  
184 exp micronesia/ (1118)  
185 (marshall island\* or caroline island\* or ellice island\* or  
gilbert island\* or johnston island\* or marianaisland\* or  
micronesia).ti,ab. (533)  
186 Kiribati.ti,ab. (86)  
187 laos/ (1520)  
188 (laos or (lao adj1 democratic republic)).ti,ab. (1227)  
189 mongolia/ (1150)  
190 mongolia.ti,ab. (1703)  
191 myanmar/ (3444)  
192 (myanmar or burma).ti,ab. (3483)  
193 papua new guinea/ (3236)  
194 Papua New Guinea.ti,ab. (3160)  
195 exp philippines/ (8007)  
196 Philippines.ti,ab. (6676)  
197 Timor-Leste.ti,ab. (153)  
198 exp melanesia/ (7574)  
199 Vanuatu.ti,ab. (379)  
200 vietnam/ (8348)  
201 (Viet Nam or Vietnam).ti,ab. (7216)  
202 american samoa/ (241)  
203 american samoa.ti,ab. (245)  
204 exp china/ (152513)  
205 china.ti,ab. (72582)  
206 fiji.ti,ab. (1201)  
207 malaysia/ (14718)  
208 malaysia.ti,ab. (9274)  
209 marshall islands.ti,ab. (141)  
210 nauru.ti,ab. (135)  
211 samoa/ (428)  
212 ("independent state of samoa" or (samoa not american samoa)  
or western samoa or navigator islands or samoan islands).ti,ab.  
(585)  
213 thailand/ (21320)  
214 Thailand.ti,ab. (16829)  
215 tonga/ (308)  
216 tonga.ti,ab. (334)  
217 tuvalu/ (97)



218 Tuvalu.ti,ab. (43)  
219 armenia/ (675)  
220 Armenia.ti,ab. (543)  
221 "republic of georgia"/ (1056)  
222 (georgia adj2 republic).ti,ab. (121)  
223 kosovo/ (296)  
224 Kosovo.ti,ab. (398)  
225 kyrgyzstan/ (637)  
226 (kyrgyzstan or kyrgyz republic or kirghizia or  
kirghiz).ti,ab. (404)  
227 moldova/ (605)  
228 Moldova.ti,ab. (304)  
229 tajikistan/ (695)  
230 tajikistan.ti,ab. (333)  
231 ukraine/ (3137)  
232 Ukraine.ti,ab. (2028)  
233 uzbekistan/ (1794)  
234 Uzbekistan.ti,ab. (969)  
235 albania/ (1008)  
236 Albania.ti,ab. (872)  
237 azerbaijan/ (1166)  
238 Azerbaijan.ti,ab. (885)  
239 belarus/ (979)  
240 (belarus or byelarus or belorussia).ti,ab. (747)  
241 bosnia-hercegovina/ (1435)  
242 (bosnia or herzegovina).ti,ab. (1019)  
243 bulgaria/ (4498)  
244 Bulgaria.ti,ab. (3036)  
245 croatia/ (4238)  
246 croatia.ti,ab. (2761)  
247 kazakhstan/ (2208)  
248 (Kazakhstan or kazakh).ti,ab. (1932)  
249 "republic of macedonia"/ (1251)  
250 Macedonia.ti,ab. (1135)  
251 "serbia and montenegro"/ (292)  
252 montenegro/ (202)  
253 Montenegro.ti,ab. (679)  
254 romania/ (7746)  
255 Romania.ti,ab. (3616)  
256 exp russia/ (16480)  
257 ussr/ (21205)  
258 (Russia or Russian Federation or USSR or Union of Soviet  
Socialist Republics or Soviet Union).ti,ab. (16854)  
259 exp serbia/ (3132)  
260 serbia.ti,ab. (2288)  
261 turkey/ (29115)  
262 turkey.ti,ab. not animal/ (4494)  
263 turkmenistan/ (616)  
264 Turkmenistan.ti,ab. (264)  
265 yugoslavia/ (3746)  
266 yugoslavia.ti,ab. (2142)  
267 haiti/ (1902)  
268 Haiti.ti,ab. (1906)  
269 bolivia/ (2488)

270 Bolivia.ti,ab. (2347)  
271 el salvador/ (1252)  
272 El Salvador.ti,ab. (962)  
273 guatemala/ (3570)  
274 Guatemala.ti,ab. (3155)  
275 honduras/ (1265)  
276 Honduras.ti,ab. (1337)  
277 nicaragua/ (1285)  
278 Nicaragua.ti,ab. (1231)  
279 argentina/ (12028)  
280 Argentina.ti,ab. (9102)  
281 belize/ (540)  
282 Belize.ti,ab. (404)  
283 exp brazil/ (82486)  
284 Brazil.ti,ab. (58625)  
285 colombia/ (9118)  
286 Colombia.ti,ab. (7851)  
287 costa rica/ (2832)  
288 Costa Rica.ti,ab. (2715)  
289 cuba/ (5005)  
290 Cuba.ti,ab. (3920)  
291 dominica/ (174)  
292 Dominica.ti,ab. (302)  
293 dominican republic/ (949)  
294 Dominican Republic.ti,ab. (1028)  
295 exp ecuador/ (2782)  
296 Ecuador.ti,ab. (2607)  
297 grenada/ (249)  
298 Grenada.ti,ab. (257)  
299 guyana/ (1094)  
300 Guyana.ti,ab. (622)  
301 jamaica/ (2677)  
302 Jamaica.ti,ab. (2508)  
303 mexico/ (21171)  
304 Mexico.ti,ab. (19607)  
305 exp panama/ (3084)  
306 Panama.ti,ab. (3555)  
307 paraguay/ (1143)  
308 Paraguay.mp. (1358)  
309 peru/ (7373)  
310 Peru.ti,ab. (6188)  
311 saint lucia/ (399)  
312 (St Lucia or Saint Lucia).ti,ab. (470)  
313 exp "saint vincent and the grenadines"/ (165)  
314 Grenadines.ti,ab. (34)  
315 suriname/ (984)  
316 Suriname.ti,ab. (349)  
317 venezuela/ (6706)  
318 Venezuela.ti,ab. (6169)  
319 djibouti/ (319)  
320 (Djibouti or French Somaliland).ti,ab. (334)  
321 exp egypt/ (17476)  
322 Egypt.ti,ab. (11928)  
323 jordan/ (2779)

324 Jordan.ti,ab. (3093)  
325 morocco/ (6250)  
326 Morocco.ti,ab. (4493)  
327 syria/ (1325)  
328 (Syria or Syrian Arab Republic).ti,ab. (1150)  
329 tunisia/ (6032)  
330 tunisia.ti,ab. (3763)  
331 gaza.ti,ab. (442)  
332 exp yemen/ (1535)  
333 Yemen.ti,ab. (1411)  
334 algeria/ (4283)  
335 Algeria.ti,ab. (3249)  
336 Iran/ (39326)  
337 Iran.ti,ab. (23778)  
338 iraq/ (4008)  
339 Iraq.ti,ab. (3215)  
340 lebanon/ (2275)  
341 Lebanon.ti,ab. (1824)  
342 libya/ (1341)  
343 Libya.ti,ab. (897)  
344 afghanistan/ (1730)  
345 Afghanistan.ti,ab. (1938)  
346 nepal/ (5634)  
347 Nepal.ti,ab. (5197)  
348 exp bangladesh/ (10205)  
349 Bangladesh.ti,ab. (9489)  
350 bhutan/ (407)  
351 Bhutan.ti,ab. (398)  
352 exp india/ (110694)  
353 India.ti,ab. (74421)  
354 pakistan/ (14762)  
355 Pakistan.ti,ab. (11531)  
356 sri lanka/ (6022)  
357 Sri Lanka.ti,ab. (4036)  
358 maldives/ (177)  
359 Maldives.ti,ab. (160)  
360 benin/ (2268)  
361 (Benin or Dahomey).ti,ab. (3045)  
362 burkina faso/ (4338)  
363 (Burkina Faso or Burkina Fasso or Upper Volta).ti,ab. (4322)  
364 burundi/ (630)  
365 Burundi.ti,ab. (680)  
366 central african republic/ (1025)  
367 (Central African Republic or Ubangi-Shari).ti,ab. (1047)  
368 chad/ (1146)  
369 Chad.ti,ab. (1168)  
370 exp comoros/ (282)  
371 (Comoros or Comoro Islands or Mayotte or Iles  
Comores).ti,ab. (437)  
372 congo democratic republic/ (6551)  
373 ((democratic republic adj2 congo) or belgian congo or  
zaire).ti,ab. (5467)  
374 eritrea/ (613)  
375 Eritrea.ti,ab. (589)

376 ethiopia/ (10687)  
377 Ethiopia.ti,ab. (9747)  
378 gambia/ (2811)  
379 Gambia.ti,ab. (2433)  
380 guinea/ (1107)  
381 (Guinea not (New Guinea or Guinea Pig\* or Guinea  
Fowl)).ti,ab. (3944)  
382 guinea-bissau/ (927)  
383 (Guinea-Bissau or Portuguese Guinea).ti,ab. (913)  
384 liberia/ (1503)  
385 Liberia.ti,ab. (1575)  
386 madagascar/ (3618)  
387 (Madagascar or Malagasy Republic).ti,ab. (3632)  
388 malawi/ (5417)  
389 (Malawi or Nyasaland).ti,ab. (5035)  
390 mali/ (2872)  
391 Mali.ti,ab. (2802)  
392 exp mozambique/ (2692)  
393 (Mozambique or Mocambique or Portuguese East Africa).ti,ab.  
(2722)  
394 niger/ (1210)  
395 (Niger not (Aspergillus or Peptococcus or Schizothorax or  
Cruciferae or Gobius or Lasius or Agelastes or Melanosuchus or  
radish or Parastromateus or Orius or Apergillus or Parastromateus or  
Stomoxys)).ti,ab. (3180)  
396 rwanda/ (1974)  
397 (Rwanda or Ruanda).ti,ab. (1979)  
398 senegal/ (6071)  
399 senegal.ti,ab. (5129)  
400 sierra leone/ (1938)  
401 Sierra Leone.ti,ab. (1958)  
402 somalia/ (1567)  
403 Somalia.ti,ab. (1133)  
404 south sudan/ (231)  
405 south sudan.ti,ab. (339)  
406 tanzania/ (12107)  
407 (Tanzania or Tanganyika or Zanzibar).ti,ab. (11548)  
408 togo/ (1516)  
409 (Togo or Togolese Republic).ti,ab. (1383)  
410 uganda/ (11831)  
411 Uganda.ti,ab. (11234)  
412 zimbabwe/ (6119)  
413 (Zimbabwe or Rhodesia).ti,ab. (5808)  
414 angola/ (1328)  
415 angola.ti,ab. (1379)  
416 cameroon/ (6631)  
417 Cameroon.ti,ab. (5434)  
418 cape verde/ (295)  
419 (Cape Verde or Cabo Verde).ti,ab. (318)  
420 congo/ (2050)  
421 (congo not ((democratic republic adj3 congo) or congo red or  
crimean-congo)).ti,ab. (4929)  
422 cote d'ivoire/ (4287)  
423 (Cote d'Ivoire or Ivory Coast).ti,ab. (4247)

424 ghana/ (8599)  
 425 (Ghana or Gold Coast).ti,ab. (8204)  
 426 kenya/ (16049)  
 427 kenya.ti,ab. (14594)  
 428 lesotho/ (546)  
 429 (Lesotho or Basutoland).ti,ab. (544)  
 430 mauritania/ (498)  
 431 Mauritania.ti,ab. (555)  
 432 nigeria/ (30652)  
 433 Nigeria.ti,ab. (25935)  
 434 exp "sao tome and principe"/ (213)  
 435 (sao tome adj2 principe).ti,ab. (110)  
 436 sudan/ (6596)  
 437 (Sudan not south sudan).ti,ab. (7046)  
 438 swaziland/ (707)  
 439 Swaziland.ti,ab. (713)  
 440 zambia/ (4646)  
 441 (Zambia or Northern Rhodesia).ti,ab. (4143)  
 442 botswana/ (1747)  
 443 (Botswana or Bechuanaland or Kalahari).ti,ab. (1746)  
 444 equatorial guinea/ (382)  
 445 (Equatorial Guinea or Spanish Guinea).ti,ab. (392)  
 446 gabon/ (1611)  
 447 (Gabon or Gabonese Republic).ti,ab. (1530)  
 448 mauritius/ (925)  
 449 (Mauritius or Agalega Islands).ti,ab. (906)  
 450 namibia/ (945)  
 451 Namibia.ti,ab. (725)  
 452 exp south africa/ (28401)  
 453 South Africa.ti,ab. (20013)  
 454 or/167-453 [ALL LMIC] (967465)  
 455 106 and 166 and 454 (19695)  
 456 humans/ (2057845)  
 457 animals/ (2869491)  
 458 456 and 457 (2057840)  
 459 457 not 458 (811651)  
 460 455 not 459 (19263)  
 461 limit 460 to yr="1970 -Current" (16237)  
 462 (correspondence or editorial).pt. (45109)  
 463 461 not 462 (15998)  
 464 limit 463 to english language (11833)

Ebsco CINAHL Plus

Dates of database coverage: complete database

Date searched: 25/04/2018

S1 (MH "Infection Control+") OR (MH "Disinfectants") OR (MH  
 "Cleaning Compounds") 60,321  
 S2 (TI "infect\* control\*") OR (AB "infect\* control\*") 9,710  
 S3 (TI (disease N1 control\*)) OR (AB (disease N1 control\*))  
 12,715  
 S4 (TI (environ\* N3 contaminat\*)) OR (AB (environ\* N3  
 contaminat\*)) 848

S5 (TI sterili?at\*) OR (AB sterili?at\*) 2,808  
S6 (TI decontaminat\*) OR (AB decontaminat\*) 1,804  
S7 (TI disinfect\*) OR (AB disinfect\*) 4,062  
S8 (TI (clean or cleans or cleaned or cleaning)) OR (AB (clean or cleans or cleaned or cleaning)) 9,679  
S9 (TI autoclave\*) OR (AB autoclave\*) 213  
S10 (MH "Sanitation+") OR (MH "Environmental Microbiology+") OR (MH "Water Pollution") 14,956  
S11 (TI "dirty water") OR (AB "dirty water") 13  
S12 (TI "surface water") OR (AB "surface water") 162  
S13 (TI rain-water) OR (AB rain-water) OR (TI rainwater) OR (AB rainwater) 52  
S14 (TI (water N4 (puri\* or floccul\* or stagna\* or contaminat\* or recontaminat\* or "re-contaminat\*"))) OR (AB (water N4 (puri\* or floccul\* or stagna\* or contaminat\* or recontaminat\* or "re-contaminat\*"))) 1,228  
S15 (TI (water N3 (quality or chlor\* or coagulation or turbidity or microbiol\* or pipe? or pipe or standpipe? or standpipe or pump\* or handpump\* or distance or connect\* or access\* or quantity or quantities or volume? or volume or sediment\*))) OR (AB (water N3 (quality or chlor\* or coagulation or turbidity or microbiol\* or pipe? or pipe or standpipe? or standpipe or pump\* or handpump\* or distance or connect\* or access\* or quantity or quantities or volume? or volume or sediment\*))) 2,444  
S16 (TI (water N2 (safe\* or unsafe\* or filtr\* or filter\* or supply or store? or store or storage or drink\* or consum\* or distribut\*))) OR (AB (water N2 (safe\* or unsafe\* or filtr\* or filter\* or supply or store? or store or storage or drink\* or consum\* or distribut\*))) 5,529  
S17 (TI (water N1 (treat\* or improv\* or radiat\* or irradiat\* or reserve? or reserve))) OR (AB (water N1 (treat\* or improv\* or radiat\* or irradiat\* or reserve? or reserve))) 937  
S18 (MH "Hygiene") 3,501  
S19 (TI hygien\*) OR (AB hygien\*) 16,362  
S20 (TI hand N3 wash\*) OR (AB hand N3 wash\*) OR (TI handwash\*) OR (AB handwash\*) 2,188  
S21 (TI (soap? or soap)) OR (AB (soap? or soap)) 1,388  
S22 (TI (detergent? OR detergent)) OR (AB (detergent? OR detergent)) 636  
S23 (TI ("hand-rub?" OR "hand-rub")) OR (AB ("hand-rub?" OR "hand-rub")) 334  
S24 (TI ("hand gel?" OR "hand gel")) OR (AB ("hand gel?" OR "hand gel")) 83  
S25 (TI ("alcohol-based gel?" OR "alcohol-based gel")) OR (AB ("alcohol-based gel?" OR "alcohol-based gel")) 14  
S26 (TI ("alcohol-based rub?" OR "alcohol-based rub")) OR (AB ("alcohol-based rub?" OR "alcohol-based rub")) 8  
S27 (TI "wash\* facilit\*") OR (AB "wash\* facilit\*") 0  
S28 (TI (water N2 (laundry or wash\* or bath\*))) OR (AB (water N2 (laundry or wash\* or bath\*))) 688  
S29 (TI (sink? OR sink)) OR (AB (sink? OR sink)) 592  
S30 (TI (faucet? OR faucet)) OR (AB (faucet? OR faucet))  
111  
S31 (TI (taps OR tap)) OR (AB (taps or tap)) 2,866

S32 (TI (bucket? OR bucket)) OR (AB (bucket? OR bucket))  
 315  
 S33 (TI (bowl? OR bowl)) OR (AB (bowl? OR bowl)) 547  
 S34 (MH "Medical Waste+") 683  
 S35 (TI (waste N4 (medical or solid? or solid or product\* or  
 water or sharp? or sharp or hazard\* or organic\* or food\* or lab\* or  
 surg\* or biolog\* or contaminat\* or infect\*)) OR (AB (waste N4  
 (medical or solid? or solid or product\* or water or sharp? or sharp  
 or hazard\* or organic\* or food\* or lab\* or surg\* or biolog\* or  
 contaminat\* or infect\*))) 1,337  
 S36 (TI wastewater) OR (AB wastewater) 456  
 S37 (TI "waste-water") OR (AB "waste-water") 56  
 S38 (TI (inanimate N2 environment\*)) OR (AB (inanimate N2  
 environment\*)) 29  
 S39 (TI (sanitary or sanitation)) OR (AB (sanitary or  
 sanitation)) 2,117  
 S40 (TI toilet\*) OR (AB toilet\*) 1,819  
 S41 (TI (latrine? OR latrine)) OR (AB (latrine? OR latrine))  
 155  
 S42 (TI (potty or potties)) OR (AB (potty or potties)) 112  
 S43 (TI (pit? OR pit)) OR (AB (pit? OR pit)) 1,555  
 S44 (TI (privy or privies)) OR (AB (privy OR privies)) 30  
 S45 (TI wc) OR (AB wc) 1,720  
 S46 (TI ("water closet?" OR "water closet")) OR (AB ("water  
 closet?" OR "water closet")) 3  
 S47 (TI ("pour flush?" OR "pour flush")) OR (AB ("pour flush?"  
 OR "pour flush")) 1  
 S48 (TI (shower? OR shower)) OR (AB (shower? OR shower))  
 643  
 S49 (TI sewerage) OR (AB sewerage) 38  
 S50 (TI (sewer? OR sewer)) OR (AB (sewer? OR sewer)) 99  
 S51 (TI ("septic tank?" OR "septic tank")) OR (AB ("septic  
 tank?" OR "septic tank")) 27  
 S52 (TI "open defecation" OR (AB "open defecation")) 39  
 S53 (TI ("grease trap?" OR "grease trap")) OR (AB ("grease  
 trap?" OR "grease trap")) 1  
 S54 (TI ((faeces or feces or faecal or fecal or excre\* or  
 defecat\* or solids) N3 (dispos\* or manag\* or service\* or collect\* or  
 stor\* or segregat\*)) OR (AB ((faeces or feces or faecal or fecal or  
 excre\* or defecat\* or solids) N3 (dispos\* or manag\* or service\* or  
 collect\* or stor\* or segregat\*))) 1,033  
 S55 (TI ((waste OR garbage OR rubbish) N3 (dispos\* or manag\* or  
 service\* or collect\* or store\* or segregat\* or safe or treat\* or  
 improv\* or microbiol\* or contaminat\* or recontaminat\* or "re-  
 contaminat\*" or incinerat\* or burn\* or fire or compost\*)) OR (AB  
 ((waste OR garbage OR rubbish) N3 (dispos\* or manag\* or service\* or  
 collect\* or store\* or segregat\* or safe or treat\* or improv\* or  
 microbiol\* or contaminat\* or recontaminat\* or "re-contaminat\*" or  
 incinerat\* or burn\* or fire or compost\*))) 1,264  
 S56 (TI ((softs OR dressing OR dressing?) N3 (dispos\* or manag\*  
 or service\* or collect\* or store\* or segregat\* or safe or treat\* or  
 improv\* or microbiol\* or contaminat\* or recontaminat\* or "re-  
 contaminat\*" or incinerat\* or burn\* or fire or compost\*)) OR (AB  
 ((softs OR dressing OR dressing?) N3 (dispos\* or manag\* or service\*

or collect\* or store\* or segregat\* or safe or treat\* or improv\* or  
 microbiol\* or contaminat\* or recontaminat\* or "re-contaminat\*" or  
 incinerat\* or burn\* or fire or compost\*)) 2,799  
 S57 (TI ((sharps OR needle OR needle? OR scalpel OR scalpel?)  
 N3 (dispos\* or manag\* or service\* or collect\* or store\* or segregat\*  
 or safe or treat\* or improv\* or microbiol\* or contaminat\* or  
 recontaminat\* or "re-contaminat\*" or incinerat\* or burn\* or fire or  
 compost\*)) OR (AB ((sharps OR needle OR needle? OR scalpel OR  
 scalpel?) N3 (dispos\* or manag\* or service\* or collect\* or store\* or  
 segregat\* or safe or treat\* or improv\* or microbiol\* or contaminat\*  
 or recontaminat\* or "re-contaminat\*" or incinerat\* or burn\* or fire  
 or compost\*)) 1,446  
 S58 (TI ((food OR food?) N3 (dispos\* or manag\* or collect\* or  
 store\* or segregat\* or incinerat\* or burn\* or fire)) OR (AB ((food  
 OR food?) N3 (dispos\* or manag\* or collect\* or store\* or segregat\*  
 or incinerat\* or burn\* or fire)) 2,006  
 S59 (TI (medical N3 (dispos\* or collect\* or store\* or segregat\*  
 or incinerat\* or burn\* or fire)) OR (AB (medical N3 (dispos\* or  
 collect\* or store\* or segregat\* or incinerat\* or burn\* or fire))  
 3,428  
 S60 (TI (surg\* N3 (dispos\* or collect\* or store\* or segregat\*  
 or incinerat\* or burn\* or fire)) OR (AB (surg\* N3 (dispos\* or  
 collect\* or store\* or segregat\* or incinerat\* or burn\* or fire))  
 2,139  
 S61 (TI (biolog\* N3 (dispos\* or manag\* or collect\* or store\* or  
 segregat\* or incinerat\* or burn\* or fire)) OR (AB (biolog\* N3  
 (dispos\* or manag\* or collect\* or store\* or segregat\* or incinerat\*  
 or burn\* or fire)) 671  
 S62 (TI (anatom\* N3 (dispos\* or manag\* or collect\* or store\* or  
 segregat\* or incinerat\* or burn\* or fire)) OR (AB (anatom\* N3  
 (dispos\* or manag\* or collect\* or store\* or segregat\* or incinerat\*  
 or burn\* or fire)) 335  
 S63 (TI ((corpse OR corpse?) N3 (dispos\* or manag\* or collect\*  
 or store\* or segregat\* or incinerat\* or burn\* or fire)) OR (AB  
 ((corpse OR corpse?) N3 (dispos\* or manag\* or collect\* or store\* or  
 segregat\* or incinerat\* or burn\* or fire)) 10  
 S64 (TI ((cadaver OR cadaver?) N3 (dispos\* or manag\* or  
 collect\* or store\* or segregat\* or incinerat\* or burn\* or fire)) OR  
 (AB ((cadaver OR cadaver?) N3 (dispos\* or manag\* or collect\* or  
 store\* or segregat\* or incinerat\* or burn\* or fire)) 32  
 S65 (TI (bin or bins)) OR (AB (bin or bins)) 415  
 S66 (TI (dustbin? or dustbin)) OR (AB (dustbin? OR dustbin))  
 16  
 S67 (TI "garbage can") OR (AB "garbage can") 9  
 S68 (TI trash) OR (AB trash) 222  
 S69 (TI "personal protective equipment") OR (AB "personal  
 protective equipment") 1,007  
 S70 (TI "safety box\*") OR (AB "safety box\*") 7  
 S71 S1 OR S2 OR S3 OR S4 OR S5 OR S6 OR S7 OR S8 OR S9 OR S10  
 OR S11 OR S12 OR S13 OR S14 OR S15 OR S16 OR S17 OR S18 OR S19 OR  
 S20 OR S21 OR S22 OR S23 OR S24 OR S25 OR S26 OR S27 OR S28 OR S29  
 OR S30 OR S31 OR S32 OR S33 OR S34 OR S35 OR S36 OR S37 OR S38 OR  
 S39 OR S40 OR S41 OR S42 OR S43 OR S44 OR S45 OR S46 OR S47 OR S48  
 OR S49 OR S50 OR S51 OR S52 OR S53 OR S54 OR S55 OR S56 OR S57 OR



S58 OR S59 OR S60 OR S61 OR S62 OR S63 OR S64 OR S65 OR S66 OR S67  
OR S68 OR S69 OR S70 141,907

S72 (MH "Health Facilities") OR (MH "Academic Medical Centers")  
OR (MH "Ambulatory Care Facilities+") OR (MH "Ancillary Services,  
Hospital") OR (MH "Dental Facilities+") OR (MH "Health Facility  
Departments+") OR (MH "Hospital Units+") OR (MH "Hospitals+") OR (MH  
"Housing for the Elderly") OR (MH "Rehabilitation Centers+") OR (MH  
"Residential Facilities+") OR (MH "Tissue Banks+") 333,287

S73 (TI (hospital or hospitals)) OR (AB (hospital or  
hospitals)) 280,598

S74 (TI (health N1 (clinic or facility or facilities or  
institution? or institution or ward? or ward or setting? or setting  
or service? or service or room? or room or unit? or unit or theatre?  
or theatre or theater? or theater)) or "health centre?" or "health  
centre" or "health center?" or "health center") OR (AB (health N1  
(clinic or facility or facilities or institution? or institution or  
ward? or ward or setting? or setting or service? or service or room?  
or room or unit? or unit or theatre? or theatre or theater? or  
theater)) or "health centre?" or "health centre" or "health center?"  
or "health center") 83,433

S75 (TI ((healthcare or care or medic\* or nurs\* or secondary or  
primary or tertiary) N1 (clinic OR facility or facilities OR centre?  
OR center? OR centre OR center OR institution or institution? OR  
ward? OR ward OR setting? OR setting OR service? OR service OR room?  
OR room OR unit? OR unit OR theatre? OR theatre OR theater? OR  
theater))) OR (AB ((healthcare or care or medic\* or nurs\* or  
secondary or primary or tertiary) N1 (clinic OR facility or  
facilities OR centre? OR center? OR centre OR center OR institution  
or institution? OR ward? OR ward OR setting? OR setting OR service?  
OR service OR room? OR room OR unit? OR unit OR theatre? OR theatre  
OR theater? OR theater))) 181,916

S76 (TI ((matern\* or birth\* or neonat\* or baby or babies or  
paediatric or paediatric? or pediatric or pediatric?) N1 (clinic OR  
facility or facilities OR centre? OR center? OR centre OR center OR  
institution or institution? OR ward? OR ward OR setting? OR setting  
OR service? OR service OR room? OR room OR unit? OR unit OR theatre?  
OR theatre OR theater? OR theater))) OR (AB ((matern\* or birth\* or  
child\* or neonat\* or baby or babies or paediatric or paediatric? or  
pediatric or pediatric? or child\*) N1 (clinic OR facil\* OR centre?  
OR center? OR centre OR center OR institut\* OR ward? OR ward OR  
setting? OR setting OR service? OR service OR room? OR room OR unit?  
OR unit OR theatre? OR theatre OR theater? OR theater))) 24,554

S77 (TI (delivery N1 (clinic OR facility or facilities OR  
centre? OR center? OR centre OR center OR institution or  
institution? OR ward? OR ward OR setting? OR setting OR room? OR  
room OR unit? OR unit OR theatre? OR theatre OR theater? OR  
theater))) OR (AB (delivery N1 (clinic OR facil\* OR centre? OR  
center? OR centre OR center OR institut\* OR ward? OR ward OR  
setting? OR setting OR room? OR room OR unit? OR unit OR theatre? OR  
theatre OR theater? OR theater))) 2,411

S78 (TI ((dentist OR dental) N1 (clinic OR facil\* OR centre? OR  
center? OR centre OR center OR institut\* OR ward? OR ward OR  
setting? OR setting OR service? OR service OR room? OR room OR unit?  
OR unit OR theatre? OR theatre OR theater? OR theater))) OR (AB

((dentist OR dental) N1 (clinic OR facil\* OR centre? OR center? OR centre OR center OR institut\* OR ward? OR ward OR setting? OR setting OR service? OR service OR room? OR room OR unit? OR unit OR theatre? OR theatre OR theater? OR theater))) 3,634

S79 (TI ((geriatric? OR geriatric) N1 (clinic OR facil\* OR centre? OR center? OR centre OR center OR institut\* OR ward? OR ward OR setting? OR setting OR service? OR service OR room? OR room OR unit? OR unit OR theatre? OR theatre OR theater? OR theater))) OR (AB ((geriatric? OR geriatric) N1 (clinic OR facil\* OR centre? OR center? OR centre OR center OR institut\* OR ward? OR ward OR setting? OR setting OR service? OR service OR room? OR room OR unit? OR unit OR theatre? OR theatre OR theater? OR theater))) 2,376

S80 (TI ((outpatient? OR outpatient OR "out-patient?" OR "out-patient") N1 (clinic OR facil\* OR centre? OR center? OR centre OR center OR institut\* OR ward? OR ward OR setting? OR setting OR service? OR service OR room? OR room OR unit? OR unit OR theatre? OR theatre OR theater? OR theater))) OR (AB ((outpatient? OR outpatient OR "out-patient?" OR "out-patient") N1 (clinic OR facil\* OR centre? OR center? OR centre OR center OR institut\* OR ward? OR ward OR setting? OR setting OR service? OR service OR room? OR room OR unit? OR unit OR theatre? OR theatre OR theater? OR theater))) 16,038

S81 (TI ((emergency OR emergencies) N1 (clinic OR facil\* OR centre? OR center? OR centre OR center OR institut\* OR ward? OR ward OR setting? OR setting OR service? OR service OR room? OR room OR unit? OR unit OR theatre? OR theatre OR theater? OR theater))) OR (AB ((emergency OR emergencies) N1 (clinic OR facil\* OR centre? OR center? OR centre OR center OR institut\* OR ward? OR ward OR setting? OR setting OR service? OR service OR room? OR room OR unit? OR unit OR theatre? OR theatre OR theater? OR theater))) 14,572

S82 (TI ((psychiatric or mental) N1 (clinic OR facil\* OR centre? OR center? OR centre OR center OR institut\* OR ward? OR ward OR setting? OR setting OR service? OR service OR room? OR room OR unit? OR unit OR theatre? OR theatre OR theater? OR theater))) OR (AB ((psychiatric or mental) N1 (clinic OR facil\* OR centre? OR center? OR centre OR center OR institut\* OR ward? OR ward OR setting? OR setting OR service? OR service OR room? OR room OR unit? OR unit OR theatre? OR theatre OR theater? OR theater))) 20,471

S83 (TI (rehab\* N1 (clinic OR facil\* OR centre? OR center? OR centre OR center OR institut\* OR ward? OR ward OR setting? OR setting OR service? OR service OR room? OR room OR unit? OR unit OR theatre? OR theatre OR theater? OR theater))) OR (AB (rehab\* N1 (clinic OR facil\* OR centre? OR center? OR centre OR center OR institut\* OR ward? OR ward OR setting? OR setting OR service? OR service OR room? OR room OR unit? OR unit OR theatre? OR theatre OR theater? OR theater))) 12,179

S84 (TI ((surgical or surgery or surgeries or operating) N1 (clinic OR facil\* OR centre? OR center? OR centre OR center OR institut\* OR ward? OR ward OR setting? OR setting OR service? OR service OR room? OR room OR unit? OR unit OR theatre? OR theatre OR theater? OR theater))) OR (AB ((surgical or surgery or surgeries or operating) N1 (clinic OR facil\* OR centre? OR center? OR centre OR center OR institut\* OR ward? OR ward OR setting? OR setting OR service? OR service OR room? OR room OR unit? OR unit OR theatre? OR theatre OR theater? OR theater))) 16,588

S85 (TI ("long stay?" OR "long stay") N1 (clinic OR facil\* OR centre? OR center? OR centre OR center OR institut\* OR ward? OR ward OR setting? OR setting OR service? OR service OR room? OR room OR unit? OR unit OR theatre? OR theatre OR theater? OR theater))) OR (AB ("long stay?" OR "long stay") N1 (clinic OR facil\* OR centre? OR center? OR centre OR center OR institut\* OR ward? OR ward OR setting? OR setting OR service? OR service OR room? OR room OR unit? OR unit OR theatre? OR theatre OR theater? OR theater))) 231

S86 (TI ((acute or "sub-acute") N1 (clinic OR facil\* OR centre? OR center? OR centre OR center OR institut\* OR ward? OR ward OR setting? OR setting OR service? OR service OR room? OR room OR unit? OR unit OR theatre? OR theatre OR theater? OR theater))) OR (AB ((acute or "sub-acute") N1 (clinic OR facil\* OR centre? OR center? OR centre OR center OR institut\* OR ward? OR ward OR setting? OR setting OR service? OR service OR room? OR room OR unit? OR unit OR theatre? OR theatre OR theater? OR theater))) 9,031

S87 (TI (icu or nicu)) OR (AB (icu or nicu)) 25,389

S88 (TI ((stroke? OR stroke) N1 (clinic OR facil\* OR centre? OR center? OR centre OR center OR institut\* OR ward? OR ward OR setting? OR setting OR service? OR service OR room? OR room OR unit? OR unit OR theatre? OR theatre OR theater? OR theater))) OR (AB ((stroke? OR stroke) N1 (clinic OR facil\* OR centre? OR center? OR centre OR center OR institut\* OR ward? OR ward OR setting? OR setting OR service? OR service OR room? OR room OR unit? OR unit OR theatre? OR theatre OR theater? OR theater))) 3,005

S89 (TI (coronary N1 (clinic OR facil\* OR centre? OR center? OR centre OR center OR institut\* OR ward? OR ward OR setting? OR setting OR service? OR service OR room? OR room OR unit? OR unit OR theatre? OR theatre OR theater? OR theater))) OR (AB (coronary N1 (clinic OR facil\* OR centre? OR center? OR centre OR center OR institut\* OR ward? OR ward OR setting? OR setting OR service? OR service OR room? OR room OR unit? OR unit OR theatre? OR theatre OR theater? OR theater))) 1,094

S90 (TI (recovery N1 (clinic OR facil\* OR centre? OR center? OR centre OR center OR institut\* OR ward? OR ward OR setting? OR setting OR service? OR service OR room? OR room OR unit? OR unit OR theatre? OR theatre OR theater? OR theater))) OR (AB (recovery N1 (clinic OR facil\* OR centre? OR center? OR centre OR center OR institut\* OR ward? OR ward OR setting? OR setting OR service? OR service OR room? OR room OR unit? OR unit OR theatre? OR theatre OR theater? OR theater))) 2,190

S91 (TI (respiratory N1 (clinic OR facil\* OR centre? OR center? OR centre OR center OR institut\* OR ward? OR ward OR setting? OR setting OR service? OR service OR room? OR room OR unit? OR unit OR theatre? OR theatre OR theater? OR theater))) OR (AB (respiratory N1 (clinic OR facil\* OR centre? OR center? OR centre OR center OR institut\* OR ward? OR ward OR setting? OR setting OR service? OR service OR room? OR room OR unit? OR unit OR theatre? OR theatre OR theater? OR theater))) 836

S92 (TI "facility birth") OR (AB "facility birth") 25

S93 (TI "facility-based") OR (AB "facility-based") 714

S94 (TI "facility-care") OR (AB "facility-care") 107

S95 (TI (mortuary OR mortuaries)) OR (AB (mortuary OR mortuaries)) 129

S96 (MH "Health Personnel") or (MH "Allied Health Personnel") or (MH "Dietitians") or (MH "Occupational Therapists") or (MH "Physical Therapists") or (MH "Consultants") or (MH "Dentists") or (MH "Expert Clinicians+") or (MH "Faculty, Dental") or (MH "Faculty, Medical") or (MH "Faculty, Nursing") or (MH "Medical Staff+") or (MH "Mental Health Personnel+") or (MH "Midwives+") or (MH "Nurses+") or (MH "Physicians+") or (MH "Multiskilled Health Practitioners") or (MH "Operating Room Personnel+") 354,613

S97 (TI ("healthcare worker?" or "healthcare worker" or "health-care worker?" or "health-care worker" or hcw)) OR (AB ("healthcare worker?" or "healthcare worker" or "health-care worker?" or "health-care worker" or hcw)) 9,300

S98 (TI (nurse or nurses)) OR (AB (nurse or nurses)) 276,540

S99 (TI (doctor? OR doctor)) OR (AB (doctor? OR doctor)) 38,847

S100 (TI (physician? OR physician)) OR (AB (physician? OR physician)) 105,430

S101 (TI (surgeon? OR surgeon)) OR (AB (surgeon? OR surgeon)) 35,477

S102 (TI (anaesthetist? OR anesthetist? OR anesthesiologist? OR anaesthetist OR anesthetist OR anesthesiologist)) OR (AB (anaesthetist? OR anesthetist? OR anesthesiologist? OR anaesthetist OR anesthetist OR anesthesiologist)) 7,846

S103 (TI (dentist? OR dentist)) OR (AB (dentist? OR dentist)) 8,282

S104 (TI (physiotherapist? OR physiotherapist OR "physical therapist?" OR "physical therapist")) OR (AB (physiotherapist? OR physiotherapist OR "physical therapist?" OR "physical therapist")) 11,887

S105 (TI (dietician? OR dietician)) OR (AB (dietician? OR dietician)) 3,065

S106 (TI ("occupational therapist?" OR "occupational therapist")) OR (AB ("occupational therapist?" OR "occupational therapist")) 7,671

S107 (TI (psychiatrist? OR psychiatrist)) OR (AB (psychiatrist? OR psychiatrist)) 5,676

S108 (TI (mortician? OR mortician)) OR (AB (mortician? OR mortician)) 11

S109 (TI (coroner? OR coroner)) OR (AB (coroner? OR coroner)) 675

S110 S72 OR S73 OR S74 OR S75 OR S76 OR S77 OR S78 OR S79 OR S80 OR S81 OR S82 OR S83 OR S84 OR S85 OR S86 OR S87 OR S88 OR S89 OR S90 OR S91 OR S92 OR S93 OR S94 OR S95 OR S96 OR S97 OR S98 OR S99 OR S100 OR S101 OR S102 OR S103 OR S104 OR S105 OR S106 OR S107 OR S108 OR S109 1,226,377

S111 (MH "Developing Countries") or (MH "Low and Middle Income Countries") 15,607

S112 (TI ((developing or "less\* developed" or "under developed" or underdeveloped or "middle income" or "low\* income" or underserved or "under served" or deprived or poor\*) N2 (economy or economies or countr\* or nation? or nation or population? or population or world))) OR (AB ((developing or "less\* developed" or "under developed" or underdeveloped or "middle income" or "low\* income" or underserved or "under served" or deprived or poor\*) N2 (economy or

economies or countr\* or nation? or nation or population? or population or world))) 24,054

S113 (TI (low\* N2 (gdp or gnp or "gross domestic" or "gross national"))) OR (AB (low\* N2 (gdp or gnp or "gross domestic" or "gross national"))) 82

S114 (TI (low N3 middle N3 countr\*)) OR (AB (low N3 middle N3 countr\*)) 4,445

S115 (TI (lmic or lmics or "third world" or "lami countr\*" or "transitional countr\*" or "global south")) OR (AB (lmic or lmics or "third world" or "lami countr\*" or "transitional countr\*" or "global south")) 1,597

S116 (MH "Africa South of the Sahara") or (MH "Africa, Central") or (MH "Africa, Eastern") or (MH "Africa, Southern") or (MH "Africa, Western") 3,689

S117 (TI ("africa south of the sahara" or "sub-saharan africa" or "central africa" or "eastern africa" or "southern africa" or "western africa")) OR (AB ("africa south of the sahara" or "sub-saharan africa" or "central africa" or "eastern africa" or "southern africa" or "western africa")) 5,052

S118 (MH "North Korea") or (TI ("north korea" or ("democratic people\* republic" N2 korea))) OR (AB ("north korea" or ("democratic people\* republic" N2 korea))) 155

S119 (MH "Cambodia") or (TI cambodia) OR (AB cambodia) 1,341

S120 (MH "Indonesia") or (TI indonesia) OR (AB indonesia) 2,687

S121 (TI kiribati) OR (AB kiribati) 32

S122 (MH "Laos") or (TI (laos or (lao N1 "democratic republic"))) OR (AB (laos or (lao N1 "democratic republic"))) 563

S123 S241 (MH "Micronesia") or (TI ("marshall island\*" or "caroline island\*" or "ellice island\*" or "gilbert island\*" or "johnston island\*" or "mariana island\*" or micronesia)) OR (AB ("marshall island\*" or "caroline island\*" or "ellice island\*" or "gilbert island\*" or "johnston island\*" or "mariana island\*" or micronesia)) 175

S124 (MH "Mongolia") or (TI mongolia) OR (AB mongolia) 462

S125 (MH "Myanmar") or (TI (myanmar or burma)) OR (AB (myanmar or burma)) 673

S126 (MH "Papua New Guinea") or (TI "papua new guinea") OR (AB "papua new guinea") 601

S127 (MH "Philippines") or (TI philippines) OR (AB philippines) 3,005

S128 (MH "East Timor") OR (MH "Timor") or (TI timor) OR (AB timor) 230

S129 (TI vanuatu) OR (AB vanuatu) 99

S130 (MH "Vietnam") or (TI (vietnam or "viet nam")) OR (AB (vietnam or "viet nam")) 4,176

S131 (MH "American Samoa") or (TI "american samoa") OR (AB "american samoa") 94

S132 (MH "China+") or (TI china) OR (AB china) 41,112

S133 (MH "Melanesia") or (TI fiji) OR (AB fiji) 619

S134 (MH "Malaysia") or (TI malaysia) OR (AB malaysia) 4,670

S135 (TI nauru) OR (AB nauru) 43

S136 (MH "Samoa") OR (MH "Independent State of Samoa") or (TI

("independent state of samoa" or (samoa not "american samoa") or  
 "western samoa" or "navigator islands" or "samoan islands")) OR (AB  
 ("independent state of samoa" or (samoa not "american samoa") or  
 "western samoa" or "navigator islands" or "samoan islands"))  
 238  
 S137 (MH "Thailand") or (TI thailand) OR (AB thailand) 6,542  
 S138 (MH "Polynesia") or (TI tonga) OR (AB tonga) 238  
 S139 (TI tuvalu) OR (AB tuvalu) 10  
 S140 (MH "Armenia") or (TI armenia) OR (AB armenia) 254  
 S141 (MH "Georgia (Republic)") 157  
 S142 (MH "Yugoslavia") 552  
 S143 (TI kosovo) OR (AB kosovo) 255  
 S144 (MH "Kyrgyzstan") or (TI (kyrgyzstan or "kyrgyz republic"  
 or kirghizia or kirghiz)) OR (AB (kyrgyzstan or "kyrgyz republic" or  
 kirghizia or kirghiz)) 165  
 S145 (MH "Moldova") or (TI moldova) OR (AB moldova) 169  
 S146 (MH "Tajikistan") or (TI tajikistan) OR (AB tajikistan)  
 141  
 S147 (MH "Ukraine") or (TI ukraine) OR (AB ukraine) 867  
 S148 (MH "Uzbekistan") or (TI uzbekistan) OR (AB uzbekistan)  
 132  
 S149 (MH "Albania") or (TI albania) OR (AB albania) 291  
 S150 (MH "Azerbaijan") or (TI azerbaijan) OR (AB azerbaijan)  
 187  
 S151 (MH "Byelarus") or (TI (belarus or byelarus or belorussia))  
 OR (AB (belarus or byelarus or belorussia)) 232  
 S152 (MH "Bosnia-Herzegovina") or (TI (bosnia or herzegovina))  
 OR (AB (bosnia or herzegovina)) 524  
 S153 (MH "Bulgaria") or (TI bulgaria) OR (AB bulgaria) 707  
 S154 (MH "Croatia") or (TI croatia) OR (AB croatia) 1,190  
 S155 (MH "Kazakhstan") or (TI (kazakhstan or kazakh)) OR (AB  
 (kazakhstan or kazakh)) 326  
 S156 (MH "Macedonia (Republic)") or (TI macedonia) OR (AB  
 macedonia) 158  
 S157 (TI montenegro) OR (AB montenegro) 61  
 S158 (MH "Romania") or (TI romania) OR (AB romania) 1,383  
 S159 (MH "Russia") OR (MH "USSR") or (TI (Russia or "Russian  
 Federation" or USSR or "Union of Soviet Socialist Republics" or  
 "Soviet Union")) OR (AB (Russia or "Russian Federation" or USSR or  
 "Union of Soviet Socialist Republics" or "Soviet Union")) 4,798  
 S160 (MH "Serbia") or (TI serbia) OR (AB serbia) 1,199  
 S161 (MH "Turkey") or (TI turkey) OR (AB turkey) 15,265  
 S162 (MH "Turkmenistan") or (TI turkmenistan) OR (AB  
 turkmenistan) 37  
 S163 (TI yugoslavia) OR (AB yugoslavia) 140  
 S164 (MH "Haiti") or (TI haiti) OR (AB haiti) 1,981  
 S165 (MH "Bolivia") or (TI bolivia) OR (AB bolivia) 624  
 S166 (MH "El Salvador") or (TI "el salvador") OR (AB "el  
 salvador") 399  
 S167 (MH "Guatemala") or (TI guatemala) OR (AB guatemala)  
 1,187  
 S168 (MH "Honduras") or (TI honduras) OR (AB honduras) 574  
 S169 (MH "Nicaragua") or (TI nicaragua) OR (AB nicaragua)  
 625

S170 (MH "Argentina") or (TI argentina) OR (AB argentina) 2,322  
S171 (MH "Belize") or (TI belize) OR (AB belize) 205  
S172 (MH "Brazil") or (TI brazil) OR (AB brazil) 38,246  
S173 (MH "Colombia") or (TI colombia) OR (AB colombia) 2,901  
S174 (MH "Costa Rica") or (TI "costa rica") OR (AB "costa rica") 682  
S175 (MH "Cuba") or (TI cuba) OR (AB cuba) 1,552  
S176 (MH "Dominica") or (TI dominica) OR (AB dominica) 41  
S177 (MH "Dominican Republic") or (TI "dominican republic") OR (AB "dominican republic") 764  
S178 (MH "Ecuador") or (TI ecuador) OR (AB ecuador) 892  
S179 (TI grenada) OR (AB grenada) 56  
S180 (MH "Guyana") or (TI guyana) OR (AB guyana) 160  
S181 (MH "Jamaica") or (TI jamaica) OR (AB jamaica) 896  
S182 (MH "Mexico") or (TI mexico) OR (AB mexico) 10,538  
S183 (MH "Panama+") or (TI panama) OR (AB panama) 375  
S184 (MH "Paraguay") or (TI paraguay) OR (AB paraguay) 175  
S185 (MH "Peru") or (TI peru) OR (AB peru) 2,262  
S186 (TI ("st lucia" OR "saint lucia")) OR (AB ("st lucia" OR "saint lucia")) 34  
S187 (TI grenadines) OR (AB grenadines) 18  
S188 (MH "Suriname") or (TI suriname) OR (AB suriname) 203  
S189 (MH "Venezuela") or (TI venezuela) OR (AB venezuela) 618  
S190 (MH "Djibouti") or (TI (djibouti or "french somaliland")) OR (AB (djibouti or "french somaliland")) 55  
S191 (MH "Egypt") or (TI egypt) OR (AB egypt) 3,250  
S192 (MH "Jordan") or (TI jordan) OR (AB jordan) 2,504  
S193 (MH "Morocco") or (TI morocco) OR (AB morocco) 1,004  
S194 (MH "Syria") or (TI (syria or "syrian arab republic")) OR (AB (syria or "syrian arab republic")) 789  
S195 (MH "Tunisia") or (TI tunisia) OR (AB tunisia) 817  
S196 (TI gaza) OR (AB gaza) 388  
S197 (MH "Yemen") or (TI yemen) OR (AB yemen) 449  
S198 (MH "Algeria") or (TI algeria) OR (AB algeria) 274  
S199 (MH "Iran") or (TI iran) OR (AB iran) 17,643  
S200 (MH "Iraq") or (TI iraq) OR (AB iraq) 4,296  
S201 (MH "Lebanon") or (TI lebanon) OR (AB lebanon) 1,569  
S202 (MH "Libya") or (TI libya) OR (AB libya) 356  
S203 (MH "Afghanistan") or (TI afghanistan) OR (AB afghanistan) 3,225  
S204 (MH "Nepal") or (TI nepal) OR (AB nepal) 2,559  
S205 (MH "Bangladesh") or (TI bangladesh) OR (AB bangladesh) 3,729  
S206 (MH "Bhutan") or (TI bhutan) OR (AB bhutan) 189  
S207 (MH "India") or (TI india) OR (AB india) 32,128  
S208 (MH "Pakistan") or (TI pakistan) OR (AB pakistan) 4,451  
S209 (MH "Sri Lanka") or (TI ("sri lanka" or ceylon)) OR (AB ("sri lanka" or ceylon)) 1,940  
S210 (TI maldives) OR (AB maldives) 53  
S211 (MH "Benin") or (TI (benin or dahomey)) OR (AB (benin or dahomey)) 488  
S212 (MH "Burkina Faso") or (TI ("burkina faso" or "burkina

fasso" or "upper volta")) OR (AB ("burkina faso" or "burkina fasso" or "upper volta")) 767

S213 (MH "Burundi") or (TI burundi) OR (AB burundi) 148

S214 (MH "Central African Republic") or (TI ("central african republic" or "ubangi-shari")) OR (AB ("central african republic" or "ubangi-shari")) 122

S215 (MH "Chad") or (TI chad) OR (AB chad) 336

S216 (TI (Comoros or "Comoro Islands" or Mayotte or "Iles Comores")) OR (AB (Comoros or "Comoro Islands" or Mayotte or "Iles Comores")) 44

S217 (MH "Democratic Republic of the Congo") or (TI ("democratic republic" N2 congo) or "belgian congo" or zaire)) OR (AB ("democratic republic" N2 congo) or "belgian congo" or zaire)) 846

S218 (MH "Eritrea") or (TI eritrea) OR (AB eritrea) 132

S219 (MH "Ethiopia") or (TI ethiopia) OR (AB ethiopia) 3,374

S220 (MH "Gambia") or (TI gambia) OR (AB gambia) 496

S221 (MH "Guinea") or (TI (guinea NOT ("new guinea" OR "guinea pig\*" OR "guinea fowl"))) OR (AB (guinea NOT ("new guinea" OR "guinea pig\*" OR "guinea fowl"))) 578

S222 (MH "Guinea-Bissau") or (TI ("guinea-bissau" OR "portuguese guinea")) OR (AB ("guinea-bissau" OR "portuguese guinea")) 153

S223 (MH "Liberia") or (TI liberia) OR (AB liberia) 539

S224 (MH "Madagascar") or (TI (madagascar OR "malagasy republic")) OR (AB (madagascar OR "malagasy republic")) 347

S225 (MH "Malawi") or (TI (malawi OR nyasaland)) OR (AB (malawi OR nyasaland)) 2,182

S226 (MH "Mali") or (TI mali) OR (AB mali) 566

S227 (MH "Mozambique") or (TI (Mozambique OR Mocambique OR "Portuguese East Africa")) OR (AB (Mozambique OR Mocambique OR "Portuguese East Africa")) 766

S228 (MH "Niger") or (TI (Niger NOT (Aspergillus OR Peptococcus OR Schizothorax OR Cruciferae OR Gobius OR Lasius OR Agelastes OR Melanosuchus OR radish OR Parastromateus OR Orius OR Apergillus OR Parastromateus OR Stomoxys))) OR (AB (Niger NOT (Aspergillus OR Peptococcus OR Schizothorax OR Cruciferae OR Gobius OR Lasius OR Agelastes OR Melanosuchus OR radish OR Parastromateus OR Orius OR Apergillus OR Parastromateus OR Stomoxys))) 391

S229 (MH "Rwanda") or (TI (rwanda OR ruanda)) OR (AB (rwanda OR ruanda)) 918

S230 (MH "Senegal") or (TI senegal) OR (AB senegal) 612

S231 (MH "Sierra Leone") or (TI "sierra leone") OR (AB "sierra leone") 762

S232 (MH "Somalia") or (TI somalia) OR (AB somalia) 787

S233 (TI "south sudan") OR (AB "south sudan") 155

S234 (MH "Tanzania") or (TI (Tanzania OR Tanganyika OR Zanzibar)) OR (AB (Tanzania OR Tanganyika OR Zanzibar)) 3,262

S235 (MH "Togo") or (TI (togo OR "togolese republic")) OR (AB (togo OR "togolese republic")) 165

S236 (MH "Uganda") or (TI uganda) OR (AB uganda) 4,291

S237 (MH "Zimbabwe") or (TI (zimbabwe OR rhodesia)) OR (AB (zimbabwe OR rhodesia)) 1,432

S238 (MH "Angola") or (TI angola) OR (AB angola) 294

S239 (MH "Cameroon") or (TI cameroon) OR (AB cameroon) 1,104



S240 (MH "Cape Verde") or (TI ("cape verde" OR "cabo verde")) OR  
(AB ("cape verde" OR "cabo verde")) 40  
S241 (MH "Congo") or (TI (congo NOT ("democratic republic" N3  
congo) or "congo red" or "crimean-congo")) OR (AB (congo NOT  
("democratic republic" N3 congo) or "congo red" or "crimean-  
congo")) 462  
S242 (MH "Cote d'Ivoire") or (TI ("cote d'ivoire" OR "ivory  
coast")) OR (AB ("cote d'ivoire" OR "ivory coast")) 289  
S243 (MH "Ghana") or (TI (ghana OR "gold coast")) OR (AB (ghana  
or "gold coast")) 3,075  
S244 (MH "Kenya") or (TI kenya) OR (AB kenya) 4,350  
S245 (MH "Lesotho") or (TI (lesotho OR basutoland)) OR (AB  
(lesotho OR basutoland)) 228  
S246 (MH "Mauritania") or (TI mauritania) OR (AB mauritania)  
59  
S247 (MH "Nigeria") or (TI nigeria) OR (AB nigeria) 6,808  
S248 (TI ("sao tome" N2 principe)) OR (AB ("sao tome" N2  
principe)) 3  
S249 (MH "Sudan") or (TI sudan) OR (AB sudan) 1,320  
S250 (MH "Swaziland") or (TI swaziland) OR (AB swaziland)  
367  
S251 (MH "Zambia") or (TI (zambia OR "northern rhodesia")) OR  
(AB (zambia or "northern rhodesia")) 1,554  
S252 (MH "Botswana") or (TI (Botswana OR Bechuanaland OR  
Kalahari)) OR (AB (Botswana OR Bechuanaland OR Kalahari)) 767  
S253 (MH "Equatorial Guinea") or (TI ("equatorial guinea" OR  
"spanish guinea")) OR (AB ("equatorial guinea" OR "spanish guinea"))  
36  
S254 (MH "Gabon") or (TI (gabon or "gabonese republic")) OR (AB  
(gabon or "gabonese republic")) 177  
S255 (TI (Mauritius OR "Agalega Islands")) OR (AB (Mauritius OR  
"Agalega Islands")) 153  
S256 (MH "Namibia") or (TI namibia) OR (AB namibia) 316  
S257 (MH "South Africa") or (TI "south africa") OR (AB "south  
africa") 17,181  
S258 S111 OR S112 OR S113 OR S114 OR S115 OR S116 OR S117 OR  
S118 OR S119 OR S120 OR S121 OR S122 OR S123 OR S124 OR S125 OR S126  
OR S127 OR S128 OR S129 OR S130 OR S131 OR S132 OR S133 OR S134 OR  
S135 OR S136 OR S137 OR S138 OR S139 OR S140 OR S141 OR S142 OR S143  
OR S144 OR S145 OR S146 OR S147 OR S148 OR S149 OR S150 OR S151 OR  
S152 OR S153 OR S154 OR S155 OR S156 OR S157 OR S158 OR S159 OR S160  
OR S161 OR S162 OR S163 OR S164 OR S165 OR S166 OR S167 OR S168 OR  
S169 OR S170 OR S171 OR S172 OR S173 OR S174 OR S175 OR S176 OR S177  
OR S178 OR S179 OR S180 OR S181 OR S182 OR S183 OR S184 OR S185 OR  
S186 OR S187 OR S188 OR S189 OR S190 OR S191 OR S192 OR S193 OR S194  
OR S195 OR S196 OR S197 OR S198 OR S199 OR S200 OR S201 OR S202 OR  
S203 OR S204 OR S205 OR S206 OR S207 OR S208 OR S209 OR S210 OR S211  
OR S212 OR S213 OR S214 OR S215 OR S216 OR S217 OR S218 OR S219 OR  
S220 OR S221 OR S222 OR S223 OR S224 OR S225 OR S226 OR S227 OR S228  
OR S229 OR S230 OR S231 OR S232 OR S233 OR S234 OR S235 OR S236 OR  
S237 OR S238 OR S239 OR S240 OR S241 OR S242 OR S243 OR S244 OR S245  
OR S246 OR S247 OR S248 OR S249 OR S250 OR S251 OR S252 OR S253 OR  
S254 OR S255 OR S256 OR S257 303,762  
S259 S71 AND S110 AND S258 6,067

S260 S259 Limiterst- English Language 5,219  
S261 S260 Limiterst- Publication Type: Commentary, Editorial,  
Letter† 174  
S262 s260 not s261 5,045

#### Ebsco Africa-Wide Information

Dates of database coverage: complete database

Date searched: 25/04/2018

S1 (TI "infect\* control\*") OR (AB "infect\* control\*") 2,530  
S2 (TI (disease N1 control\*)) OR (AB (disease N1 control\*))  
6,472  
S3 (TI (environ\* N3 contaminat\*)) OR (AB (environ\* N3  
contaminat\*)) 914  
S4 (TI sterili?at\*) OR (AB sterili?at\*) 1,910  
S5 (TI decontaminat\*) OR (AB decontaminat\*) 723  
S6 (TI disinfect\*) OR (AB disinfect\*) 2,147  
S7 (TI (clean or cleans or cleaned or cleaning)) OR (AB (clean  
or cleans or cleaned or cleaning)) 8,200  
S8 (TI autoclave\*) OR (AB autoclave\*) 354  
S9 (TI "dirty water") OR (AB "dirty water") 65  
S10 (TI "surface water") OR (AB "surface water") 1,953  
S11 (TI rain-water) OR (AB rain-water) OR (TI rainwater) OR (AB  
rainwater) 774  
S12 (TI (water N4 (puri\* or floccul\* or stagna\* or contaminat\*  
or recontaminat\* or "re-contaminat\*"))) OR (AB (water N4 (puri\* or  
floccul\* or stagna\* or contaminat\* or recontaminat\* or "re-  
contaminat\*"))) 3,095  
S13 (TI (water N3 (quality or chlor\* or coagulation or  
turbidity or microbiol\* or pipe? or pipe or standpipe? or standpipe  
or pump\* or handpump\* or distance or connect\* or access\* or quantity  
or quantities or volume? or volume or sediment\*))) OR (AB (water N3  
(quality or chlor\* or coagulation or turbidity or microbiol\* or  
pipe? or pipe or standpipe? or standpipe or pump\* or handpump\* or  
distance or connect\* or access\* or quantity or quantities or volume?  
or volume or sediment\*))) 13,091  
S14 (TI (water N2 (saf\* or unsaf\* or filtr\* or filter\* or  
supply or store? or store or storage or drink\* or consum\* or  
distribut\*))) OR (AB (water N2 (saf\* or unsaf\* or filtr\* or  
filter\* or supply or store? or store or storage or drink\* or consum\*  
or distribut\*))) 14,766  
S15 (TI (water N1 (treat\* or improv\* or radiat\* or irradiat\* or  
reserve? or reserve))) OR (AB (water N1 (treat\* or improv\* or  
radiat\* or irradiat\* or reserve? or reserve))) 4,835  
S16 (TI hygien\*) OR (AB hygien\*) 9,226  
S17 (TI hand N3 wash\*) OR (AB hand N3 wash\*) OR (TI handwash\*)  
OR (AB handwash\*) 678  
S18 (TI (soap? or soap)) OR (AB (soap? or soap)) 1,284  
S19 (TI (detergent? OR detergent)) OR (AB (detergent? OR  
detergent)) 1,741  
S20 (TI ("hand-rub?" OR "hand-rub")) OR (AB ("hand-rub?" OR  
"hand-rub")) 20  
S21 (TI ("hand gel?" OR "hand gel")) OR (AB ("hand gel?" OR

"hand gel")) 2

S22 (TI ("alcohol-based gel?" OR "alcohol-based gel")) OR (AB ("alcohol-based gel?" OR "alcohol-based gel")) 0

S23 (TI ("alcohol-based rub?" OR "alcohol-based rub")) OR (AB ("alcohol-based rub?" OR "alcohol-based rub")) 1

S24 (TI "wash\* facilit\*") OR (AB "wash\* facilit") 5

S25 (TI (water N2 (laundry or wash\* or bath\*))) OR (AB (water N2 (laundry or wash\* or bath\*))) 667

S26 (TI (sink? OR sink)) OR (AB (sink? OR sink)) 1,185

S27 (TI (faucet? OR faucet)) OR (AB (faucet? OR faucet)) 16

S28 (TI (taps OR tap)) OR (AB (taps or tap)) 2,209

S29 (TI (bucket? OR bucket)) OR (AB (bucket? OR bucket)) 449

S30 (TI (bowl? OR bowl)) OR (AB (bowl? OR bowl)) 439

S31 (TI (waste N4 (medical or solid? or solid or product\* or water or sharp? or sharp or hazard\* or organic\* or food\* or lab\* or surg\* or biolog\* or contaminat\* or infect\*))) OR (AB (waste N4 (medical or solid? or solid or product\* or water or sharp? or sharp or hazard\* or organic\* or food\* or lab\* or surg\* or biolog\* or contaminat\* or infect\*))) 4,532

S32 (TI wastewater) OR (AB wastewater) 5,409

S33 (TI "waste-water") OR (AB "waste-water") 934

S34 (TI (inanimate N2 environment\*)) OR (AB (inanimate N2 environment\*)) 5

S35 (TI (sanitary or sanitation)) OR (AB (sanitary or sanitation)) 9,154

S36 (TI toilet\*) OR (AB toilet\*) 1,773

S37 (TI (latrine? OR latrine)) OR (AB (latrine? OR latrine)) 1,130

S38 (TI (potty or potties)) OR (AB (potty or potties)) 25

S39 (TI (pit? OR pit)) OR (AB (pit? OR pit)) 3,267

S40 (TI (privy or privies)) OR (AB (privy OR privies)) 121

S41 (TI wc) OR (AB wc) 648

S42 (TI ("water closet?" OR "water closet")) OR (AB ("water closet?" OR "water closet")) 43

S43 (TI ("pour flush?" OR "pour flush")) OR (AB ("pour flush?" OR "pour flush")) 11

S44 (TI (shower? OR shower)) OR (AB (shower? OR shower)) 312

S45 (TI sewerage) OR (AB sewerage) 625

S46 (TI (sewer? OR sewer)) OR (AB (sewer? OR sewer)) 770

S47 (TI ("septic tank?" OR "septic tank")) OR (AB ("septic tank?" OR "septic tank")) 203

S48 (TI "open defecation" OR (AB "open defecation")) 77

S49 (TI ("grease trap?" OR "grease trap")) OR (AB ("grease trap?" OR "grease trap")) 4

S50 (TI ((faeces or feces or faecal or fecal or excre\* or defecat\* or solids) N3 (dispos\* or manag\* or service\* or collect\* or stor\* or segregat\*))) OR (AB ((faeces or feces or faecal or fecal or excre\* or defecat\* or solids) N3 (dispos\* or manag\* or service\* or collect\* or stor\* or segregat\*))) 2,011

S51 (TI ((waste OR garbage OR rubbish) N3 (dispos\* or manag\* or service\* or collect\* or store\* or segregat\* or safe or treat\* or

improv\* or microbiol\* or contaminat\* or recontaminat\* or "re-contaminat\*" or incinerat\* or burn\* or fire or compost\*)) OR (AB ((waste OR garbage OR rubbish) N3 (dispos\* or manag\* or service\* or collect\* or store\* or segregat\* or safe or treat\* or improv\* or microbiol\* or contaminat\* or recontaminat\* or "re-contaminat\*" or incinerat\* or burn\* or fire or compost\*))) 4,863

S52 (TI ((softs OR dressing OR dressing?) N3 (dispos\* or manag\* or service\* or collect\* or store\* or segregat\* or safe or treat\* or improv\* or microbiol\* or contaminat\* or recontaminat\* or "re-contaminat\*" or incinerat\* or burn\* or fire or compost\*))) OR (AB ((softs OR dressing OR dressing?) N3 (dispos\* or manag\* or service\* or collect\* or store\* or segregat\* or safe or treat\* or improv\* or microbiol\* or contaminat\* or recontaminat\* or "re-contaminat\*" or incinerat\* or burn\* or fire or compost\*))) 299

S53 (TI ((sharps OR needle OR needle? OR scalpel OR scalpel?) N3 (dispos\* or manag\* or service\* or collect\* or store\* or segregat\* or safe or treat\* or improv\* or microbiol\* or contaminat\* or recontaminat\* or "re-contaminat\*" or incinerat\* or burn\* or fire or compost\*))) OR (AB ((sharps OR needle OR needle? OR scalpel OR scalpel?) N3 (dispos\* or manag\* or service\* or collect\* or store\* or segregat\* or safe or treat\* or improv\* or microbiol\* or contaminat\* or recontaminat\* or "re-contaminat\*" or incinerat\* or burn\* or fire or compost\*))) 394

S54 (TI ((food OR food?) N3 (dispos\* or manag\* or collect\* or store\* or segregat\* or incinerat\* or burn\* or fire))) OR (AB ((food OR food?) N3 (dispos\* or manag\* or collect\* or store\* or segregat\* or incinerat\* or burn\* or fire))) 1,157

S55 (TI (medical N3 (dispos\* or collect\* or store\* or segregat\* or incinerat\* or burn\* or fire))) OR (AB (medical N3 (dispos\* or collect\* or store\* or segregat\* or incinerat\* or burn\* or fire))) 809

S56 (TI (surg\* N3 (dispos\* or collect\* or store\* or segregat\* or incinerat\* or burn\* or fire))) OR (AB (surg\* N3 (dispos\* or collect\* or store\* or segregat\* or incinerat\* or burn\* or fire))) 418

S57 (TI (biolog\* N3 (dispos\* or manag\* or collect\* or store\* or segregat\* or incinerat\* or burn\* or fire))) OR (AB (biolog\* N3 (dispos\* or manag\* or collect\* or store\* or segregat\* or incinerat\* or burn\* or fire))) 625

S58 (TI (anatom\* N3 (dispos\* or manag\* or collect\* or store\* or segregat\* or incinerat\* or burn\* or fire))) OR (AB (anatom\* N3 (dispos\* or manag\* or collect\* or store\* or segregat\* or incinerat\* or burn\* or fire))) 109

S59 (TI ((corpse OR corpse?) N3 (dispos\* or manag\* or collect\* or store\* or segregat\* or incinerat\* or burn\* or fire))) OR (AB ((corpse OR corpse?) N3 (dispos\* or manag\* or collect\* or store\* or segregat\* or incinerat\* or burn\* or fire))) 19

S60 (TI ((cadaver OR cadaver?) N3 (dispos\* or manag\* or collect\* or store\* or segregat\* or incinerat\* or burn\* or fire))) OR (AB ((cadaver OR cadaver?) N3 (dispos\* or manag\* or collect\* or store\* or segregat\* or incinerat\* or burn\* or fire))) 18

S61 (TI (bin or bins)) OR (AB (bin or bins)) 1,356

S62 (TI (dustbin? or dustbin)) OR (AB (dustbin? OR dustbin))

54

S63 (TI "garbage can") OR (AB "garbage can") 2  
S64 (TI trash) OR (AB trash) 212  
S65 (TI "personal protective equipment") OR (AB "personal protective equipment") 325  
S66 (TI "safety box\*") OR (AB "safety box\*") 8  
S67 S1 OR S2 OR S3 OR S4 OR S5 OR S6 OR S7 OR S8 OR S9 OR S10 OR S11 OR S12 OR S13 OR S14 OR S15 OR S16 OR S17 OR S18 OR S19 OR S20 OR S21 OR S22 OR S23 OR S24 OR S25 OR S26 OR S27 OR S28 OR S29 OR S30 OR S31 OR S32 OR S33 OR S34 OR S35 OR S36 OR S37 OR S38 OR S39 OR S40 OR S41 OR S42 OR S43 OR S44 OR S45 OR S46 OR S47 OR S48 OR S49 OR S50 OR S51 OR S52 OR S53 OR S54 OR S55 OR S56 OR S57 OR S58 OR S59 OR S60 OR S61 OR S62 OR S63 OR S64 OR S65 OR S66 90,097  
S68 (TI (hospital or hospitals)) OR (AB (hospital or hospitals)) 91,010  
S69 (TI (health N1 (clinic or facility or facilities or institution? or institution or ward? or ward or setting? or setting or service? or service or room? or room or unit? or unit or theatre? or theatre or theater? or theater)) or "health centre?" or "health centre" or "health center?" or "health center") OR (AB (health N1 (clinic or facility or facilities or institution? or institution or ward? or ward or setting? or setting or service? or service or room? or room or unit? or unit or theatre? or theatre or theater? or theater)) or "health centre?" or "health centre" or "health center?" or "health center") 35,686  
S70 (TI ((healthcare or care or medic\* or nurs\* or secondary or primary or tertiary) N1 (clinic OR facility or facilities OR centre? OR center? OR centre OR center OR institution or institution? OR ward? OR ward OR setting? OR setting OR service? OR service OR room? OR room OR unit? OR unit OR theatre? OR theatre OR theater? OR theater))) OR (AB ((healthcare or care or medic\* or nurs\* or secondary or primary or tertiary) N1 (clinic OR facility or facilities OR centre? OR center? OR centre OR center OR institution or institution? OR ward? OR ward OR setting? OR setting OR service? OR service OR room? OR room OR unit? OR unit OR theatre? OR theatre OR theater? OR theater))) 33,361  
S71 (TI ((matern\* or birth\* or neonat\* or baby or babies or paediatric or paediatric? or pediatric or pediatric?) N1 (clinic OR facility or facilities OR centre? OR center? OR centre OR center OR institution or institution? OR ward? OR ward OR setting? OR setting OR service? OR service OR room? OR room OR unit? OR unit OR theatre? OR theatre OR theater? OR theater))) OR (AB ((matern\* or birth\* or child\* or neonat\* or baby or babies or paediatric or paediatric? or pediatric or pediatric?) N1 (clinic OR facil\* OR centre? OR center? OR centre OR center OR institut\* OR ward? OR ward OR setting? OR setting OR service? OR service OR room? OR room OR unit? OR unit OR theatre? OR theatre OR theater? OR theater))) 8,051  
S72 (TI (delivery N1 (clinic OR facility or facilities OR centre? OR center? OR centre OR center OR institution or institution? OR ward? OR ward OR setting? OR setting OR room? OR room OR unit? OR unit OR theatre? OR theatre OR theater? OR theater))) OR (AB (delivery N1 (clinic OR facil\* OR centre? OR center? OR centre OR center OR institut\* OR ward? OR ward OR setting? OR setting OR room? OR room OR unit? OR unit OR theatre? OR theatre OR theater? OR theater))) 901

S73 (TI ((dentist OR dental) N1 (clinic OR facil\* OR centre? OR center? OR centre OR center OR institut\* OR ward? OR ward OR setting? OR setting OR service? OR service OR room? OR room OR unit? OR unit OR theatre? OR theatre OR theater? OR theater))) OR (AB ((dentist OR dental) N1 (clinic OR facil\* OR centre? OR center? OR centre OR center OR institut\* OR ward? OR ward OR setting? OR setting OR service? OR service OR room? OR room OR unit? OR unit OR theatre? OR theatre OR theater? OR theater))) 967

S74 (TI ((geriatric? OR geriatric) N1 (clinic OR facil\* OR centre? OR center? OR centre OR center OR institut\* OR ward? OR ward OR setting? OR setting OR service? OR service OR room? OR room OR unit? OR unit OR theatre? OR theatre OR theater? OR theater))) OR (AB ((geriatric? OR geriatric) N1 (clinic OR facil\* OR centre? OR center? OR centre OR center OR institut\* OR ward? OR ward OR setting? OR setting OR service? OR service OR room? OR room OR unit? OR unit OR theatre? OR theatre OR theater? OR theater))) 149

S75 (TI ((outpatient? OR outpatient OR "out-patient?" OR "out-patient") N1 (clinic OR facil\* OR centre? OR center? OR centre OR center OR institut\* OR ward? OR ward OR setting? OR setting OR service? OR service OR room? OR room OR unit? OR unit OR theatre? OR theatre OR theater? OR theater))) OR (AB ((outpatient? OR outpatient OR "out-patient?" OR "out-patient") N1 (clinic OR facil\* OR centre? OR center? OR centre OR center OR institut\* OR ward? OR ward OR setting? OR setting OR service? OR service OR room? OR room OR unit? OR unit OR theatre? OR theatre OR theater? OR theater))) 2,897

S76 (TI ((emergency OR emergencies) N1 (clinic OR facil\* OR centre? OR center? OR centre OR center OR institut\* OR ward? OR ward OR setting? OR setting OR service? OR service OR room? OR room OR unit? OR unit OR theatre? OR theatre OR theater? OR theater))) OR (AB ((emergency OR emergencies) N1 (clinic OR facil\* OR centre? OR center? OR centre OR center OR institut\* OR ward? OR ward OR setting? OR setting OR service? OR service OR room? OR room OR unit? OR unit OR theatre? OR theatre OR theater? OR theater))) 2,997

S77 (TI ((psychiatric or mental) N1 (clinic OR facil\* OR centre? OR center? OR centre OR center OR institut\* OR ward? OR ward OR setting? OR setting OR service? OR service OR room? OR room OR unit? OR unit OR theatre? OR theatre OR theater? OR theater))) OR (AB ((psychiatric or mental) N1 (clinic OR facil\* OR centre? OR center? OR centre OR center OR institut\* OR ward? OR ward OR setting? OR setting OR service? OR service OR room? OR room OR unit? OR unit OR theatre? OR theatre OR theater? OR theater))) 2,693

S78 (TI (rehab\* N1 (clinic OR facil\* OR centre? OR center? OR centre OR center OR institut\* OR ward? OR ward OR setting? OR setting OR service? OR service OR room? OR room OR unit? OR unit OR theatre? OR theatre OR theater? OR theater))) OR (AB (rehab\* N1 (clinic OR facil\* OR centre? OR center? OR centre OR center OR institut\* OR ward? OR ward OR setting? OR setting OR service? OR service OR room? OR room OR unit? OR unit OR theatre? OR theatre OR theater? OR theater))) 1,357

S79 (TI ((surgical or surgery or surgeries or operating) N1 (clinic OR facil\* OR centre? OR center? OR centre OR center OR institut\* OR ward? OR ward OR setting? OR setting OR service? OR service OR room? OR room OR unit? OR unit OR theatre? OR theatre OR theater? OR theater))) OR (AB ((surgical or surgery or surgeries or

operating) N1 (clinic OR facil\* OR centre? OR center? OR centre OR center OR institut\* OR ward? OR ward OR setting? OR setting OR service? OR service OR room? OR room OR unit? OR unit OR theatre? OR theatre OR theater? OR theater))) 3,260

S80 (TI ("long stay?" OR "long stay") N1 (clinic OR facil\* OR centre? OR center? OR centre OR center OR institut\* OR ward? OR ward OR setting? OR setting OR service? OR service OR room? OR room OR unit? OR unit OR theatre? OR theatre OR theater? OR theater))) OR (AB ("long stay?" OR "long stay") N1 (clinic OR facil\* OR centre? OR center? OR centre OR center OR institut\* OR ward? OR ward OR setting? OR setting OR service? OR service OR room? OR room OR unit? OR unit OR theatre? OR theatre OR theater? OR theater))) 29

S81 (TI ((acute or "sub-acute") N1 (clinic OR facil\* OR centre? OR center? OR centre OR center OR institut\* OR ward? OR ward OR setting? OR setting OR service? OR service OR room? OR room OR unit? OR unit OR theatre? OR theatre OR theater? OR theater))) OR (AB ((acute or "sub-acute") N1 (clinic OR facil\* OR centre? OR center? OR centre OR center OR institut\* OR ward? OR ward OR setting? OR setting OR service? OR service OR room? OR room OR unit? OR unit OR theatre? OR theatre OR theater? OR theater))) 690

S82 (TI (icu or nicu)) OR (AB (icu or nicu)) 2,251

S83 (TI ((stroke? OR stroke) N1 (clinic OR facil\* OR centre? OR center? OR centre OR center OR institut\* OR ward? OR ward OR setting? OR setting OR service? OR service OR room? OR room OR unit? OR unit OR theatre? OR theatre OR theater? OR theater))) OR (AB ((stroke? OR stroke) N1 (clinic OR facil\* OR centre? OR center? OR centre OR center OR institut\* OR ward? OR ward OR setting? OR setting OR service? OR service OR room? OR room OR unit? OR unit OR theatre? OR theatre OR theater? OR theater))) 241

S84 (TI (coronary N1 (clinic OR facil\* OR centre? OR center? OR centre OR center OR institut\* OR ward? OR ward OR setting? OR setting OR service? OR service OR room? OR room OR unit? OR unit OR theatre? OR theatre OR theater? OR theater))) OR (AB (coronary N1 (clinic OR facil\* OR centre? OR center? OR centre OR center OR institut\* OR ward? OR ward OR setting? OR setting OR service? OR service OR room? OR room OR unit? OR unit OR theatre? OR theatre OR theater? OR theater))) 140

S85 (TI (recovery N1 (clinic OR facil\* OR centre? OR center? OR centre OR center OR institut\* OR ward? OR ward OR setting? OR setting OR service? OR service OR room? OR room OR unit? OR unit OR theatre? OR theatre OR theater? OR theater))) OR (AB (recovery N1 (clinic OR facil\* OR centre? OR center? OR centre OR center OR institut\* OR ward? OR ward OR setting? OR setting OR service? OR service OR room? OR room OR unit? OR unit OR theatre? OR theatre OR theater? OR theater))) 404

S86 (TI (respiratory N1 (clinic OR facil\* OR centre? OR center? OR centre OR center OR institut\* OR ward? OR ward OR setting? OR setting OR service? OR service OR room? OR room OR unit? OR unit OR theatre? OR theatre OR theater? OR theater))) OR (AB (respiratory N1 (clinic OR facil\* OR centre? OR center? OR centre OR center OR institut\* OR ward? OR ward OR setting? OR setting OR service? OR service OR room? OR room OR unit? OR unit OR theatre? OR theatre OR theater? OR theater))) 216

S87 (TI "facility birth") OR (AB "facility birth") 23

S88 (TI "facility-based") OR (AB "facility-based") 824  
S89 (TI "facility-care") OR (AB "facility-care") 26  
S90 (TI (mortuary OR mortuaries)) OR (AB (mortuary OR mortuaries)) 379  
S91 (TI ("healthcare worker?" or "healthcare worker" or "health-care worker?" or "health-care worker" or hcw)) OR (AB ("healthcare worker?" or "healthcare worker" or "health-care worker?" or "health-care worker" or hcw)) 4,560  
S92 (TI (nurse or nurses)) OR (AB (nurse or nurses)) 14,716  
S93 (TI (doctor? OR doctor)) OR (AB (doctor? OR doctor)) 14,788  
S94 (TI (physician? OR physician)) OR (AB (physician? OR physician)) 13,186  
S95 (TI (surgeon? OR surgeon)) OR (AB (surgeon? OR surgeon)) 6,526  
S96 (TI (anaesthetist? OR anesthetist? OR anesthesiologist? OR anaesthetist OR anesthetist OR anesthesiologist)) OR (AB (anaesthetist? OR anesthetist? OR anesthesiologist? OR anaesthetist OR anesthetist OR anesthesiologist)) 1,247  
S97 (TI (dentist? OR dentist)) OR (AB (dentist? OR dentist)) 1,817  
S98 (TI (physiotherapist? OR physiotherapist OR "physical therapist?" OR "physical therapist")) OR (AB (physiotherapist? OR physiotherapist OR "physical therapist?" OR "physical therapist")) 742  
S99 (TI (dietician? OR dietician)) OR (AB (dietician? OR dietician)) 242  
S100 (TI ("occupational therapist?" OR "occupational therapist")) OR (AB ("occupational therapist?" OR "occupational therapist")) 346  
S101 (TI (psychiatrist? OR psychiatrist)) OR (AB (psychiatrist? OR psychiatrist)) 1,430  
S102 (TI (mortician? OR mortician)) OR (AB (mortician? OR mortician)) 6  
S103 (TI (coroner? OR coroner)) OR (AB (coroner? OR coroner)) 112  
S104 S68 OR S69 OR S70 OR S71 OR S72 OR S73 OR S74 OR S75 OR S76 OR S77 OR S78 OR S79 OR S80 OR S81 OR S82 OR S83 OR S84 OR S85 OR S86 OR S87 OR S88 OR S89 OR S90 OR S91 OR S92 OR S93 OR S94 OR S95 OR S96 OR S97 OR S98 OR S99 OR S100 OR S101 OR S102 OR S103 179,377  
S105 S67 AND S104 9,266  
S106 S105 Limiterst- Language: English† 8,254  
S107 s106 Limiterst- Year Published: 1970-2018 7,779

Web of Science Core Collection

Dates of database coverage: Science Citation Index Expanded 1970-present;

Social Sciences Citation Index 1970-present;  
Arts & Humanities Citation Index 1975-present;  
Conference Proceedings Citation Index-Science 1990-present;  
Conference Proceedings Citation Index-Social Science &

Humanities 1990-present;

Emerging Sources Citation Index 2015-present.



Data last updated 2018/04/25

Date searched: 25/04/2018

# 1 TOPIC: ("infect\* control\*" or (disease near/1 control\*) or (environ\* near/3 contaminat\*) or sterili?at\* or decontaminat\* or disinfect\* or clean or cleans or cleaned or cleaning or autoclave?) 335,619

# 2 TOPIC: ("dirty water" or "surface water" or rainwater or "rain water" or (water near/4 (puri\* or floccul\* or stagna\* or contaminat\* or recontaminat\* or re-contaminat\*)) or (water near/3 (quality or chlor\* or coagulation or turbidity or microbiol\* or pipe? or standpipe? or pump\* or handpump\* or distance or connect\* or access\* or quantity or quantities or volume? or sediment\*)) or (water near/2 (safe\* or unsafe\* or filtr\* or filter\* or supply or store? or storage or drink\* or consum\* or distribut\*)) or (water near/1 (treat\* or improv\* or radiat\* or irradiat\* or reserve?))) 435,152

# 3 TOPIC: (Hygien\* or (hand near/3 wash\*) or handwash\* or soap? or detergent? or "hand rub?" or "hand gel?" or "alcohol based gel?" or "alcohol based rub" or "wash\* facilit\*" or (water near/2 (laundry or wash\* or bath\*)) or sink? or basin? or faucet? or tap or taps or bucket?) 239,006

# 4 TOPIC: ((waste near/4 (medical or solid? or product\* or water or sharp? or hazard\* or organic\* or food\* or lab\* or surg\* or biolog\* or contaminat\* or infect\*)) or wastewater or "waste water" or (inanimate near/2 environment\*) or sanita\* or toilet\* or latrine? or potty or potties or pit? or privy or privies or wc or "water closet?" or "pour flush" or shower? or sewerage or sewer? or "septic tank?" or "open defecation" or "grease trap?" or ((faeces or feces or faecal or fecal or excre\* or defecat\* or solids or waste or garbage or rubbish or sharps or softs or dressing? or needle? or scalpel?) near/3 (dispos\* or manag\* or service\* or collect\* or store\* or segregat\* or safe or treat\* or improv\* or microbiol\* or contaminat\* or recontaminat\* or "re-contaminat\*" or incinerat\* or burn\* or fire or compost\*)) or ((food? or medical or surg? or biolog\* or anatom\* or corpse? or cadaver?) near/3 (dispos\* or collect\* or store\* or segregat\* or incinerat\* or burn\* or fire)) or bin or bins or dustbin? or "garbage can?" or "personal protective equipment" or "safety box") 442,314

# 5 #4 OR #3 OR #2 OR #1 1,302,025

# 6 TOPIC: (hospital or hospitals or ((care or healthcare or health or medic\* or nurs\* or secondary or primary or tertiary or matern\* or birth\* or dentist or dental or child\* or neonat\* or baby or babies or paediatric? or pediatric? or geriatric? or outpatient? or "out patient?" or emergency or emergencies or psychiatric or mental or rehab\* or surgical or surgery or surgeries or "long stay?" or acute or "sub acute" or subacute or "intensive care" or burn? or stroke? or coronary or recovery or respiratory or operating) near/1 (clinic or facility or facilities or centre? or center? or institution? or ward? or setting? or service? or room? or unit? or theatre? or theater?)) or (health near/1 (clinic or facility or facilities or institution? or ward? or setting? or service? or room? or unit? or theatre? or theater?)) or (delivery near/1 (clinic or facility or facilities or centre? or center? or institution? or

ward? or setting? or room? or unit? or theatre? or theater?)) or health centre? or health center? or icu or nicu or "facility birth" or "facility based" or "facility care" or mortuary or mortuaries) 1,041,774

# 7 TOPIC: ("healthcare worker?" or "health care worker?" or hcw or nurse? or doctor? or physician? or surgeon? or anaesthetist? or anesthetist? or anaesthesiologist? or dentist? or physiotherapist? or "physical therapist?" or dietician? or "occupational therapist?" or psychiatrist? or mortician? or coroner?) 465,238

# 8 #7 OR #6 1,387,482

# 9 TOPIC: (((developing or "less\* developed" or "under developed" or underdeveloped or "middle income" or "low\* income" or underserved or "under served" or deprived or poor\*) near/2 (economy or economies or countr\* or nation? or population? or world)) or (low\* near/2 (gdp or gnp or "gross domestic" or "gross national")) or lmic or lmics or "third world" or "lami countr\*" or "transitional countr\*" or "global south") 209,238

# 10 TOPIC: ((north korea or (democratic people\* republic near/2 korea)) or cambodia or indonesia or kiribati or laos or (lao near/1 "democratic republic") or "marshall island\*" or "caroline island\*" or "ellice island\*" or "gilbert island\*" or "johnston island\*" or "mariana island\*" or micronesia or mongolia or myanmar or burma or "papua new guinea" or philippines or "timor-leste" or vanuatu or "viet nam" or vietnam or "american samoa" or china or fiji or malaysia or nauru or "independent state of samoa" or "western samoa" or "navigator islands" or "samoan islands" or thailand or tonga or tuvalu or afghanistan or nepal or bangladesh or bhutan or india or pakistan or "sri lanka" or ceylon or maldives) 978,502

# 11 TOPIC: (armenia or kosovo or (georgia near/2 republic) or kosovo or kyrgyzstan or "kyrgyz republic" or kirghizia or kirghiz or moldova or tajikistan or ukraine or uzbekistan or albania or azerbaijan or belarus or byelarus or belorussia or bosnia or herzegovina or bulgaria or croatia or kazakhstan or kazakh or macedonia or montenegro or romania or russia or ussr or "russian federation" or "union of soviet socialist republics" or "soviet union" or serbia or turkey or turkmenistan or yugoslavia or djibouti or "french somaliland" or egypt or jordan or morocco or syria or syrian arab republic or tunisia or gaza or yemen or algeria or iran or iraq or jordan or lebanon or libya) 525,691

# 12 TOPIC: (haiti or bolivia or "el salvador" or guatemala or honduras or nicaragua or argentina or belize or brazil or colombia or "costa rica" or cuba or dominica or "dominican republic" or ecuador or grenada or guyana or jamaica or mexico or panama or paraguay or peru or "saint lucia" or "st lucia" or grenadines or suriname or venezuela) 506,249

# 13 TOPIC: ("africa south of the sahara" or "sub-saharan africa" or "central africa" or "eastern africa" or "southern africa" or "western africa" or benin or dahomey or "burkina faso" or "burkina fasso" or "upper volta" or burundi or "central african republic" or "ubangi-shari" or chad or comoros or "comoro islands" or mayotte or "iles comores" or (democratic republic near/2 congo) or "belgian congo" or zaire or eritrea or ethiopia or gambia or (guinea not ("new guinea" or "guinea pig\*" or "guinea fowl")) or

"guinea-bissau" or "portuguese guinea" or liberia or madagascar or "malagasy republic" or malawi or nyasaland or mali or mozambique or mocambique or "portuguese east africa" or (niger not (Aspergillus or Peptococcus or Schizothorax or Cruciferae or Gobius or Lasius or Agelastes or Melanosuchus or radish or Parastromateus or Orius or Apergillus or Parastromateus or Stomoxys)) or rwanda or ruanda or senegal or "sierra leone" or somalia or "south sudan" or tanzania or tanganyika or zanzibar or togo or "togolese republic" or uganda or zimbabwe or rhodesia or angola or cameroon or "cape verde" or "cabo verde" or (congo not ("democratic republic" near/3 congo) or "congo red" or "crimean congo")) or "cote d ivoire" or "cote divoire" or "ivory coast" or ghana or "gold coast" or kenya or lesotho or basutoland or mauritania or nigeria or ("sao tome" near/2 principe) or (sudan not "south sudan") or swaziland or zambia or "northern rhodesia" or botswana or bechuanaland or kalahari or "equatorial guinea" or "spanish guinea" or gabon or "gabonese republic" or mauritius or "agalega islands" or namibia or "south africa")

422,898

# 14 #13 OR #12 OR #11 OR #10 OR #9 2,456,950

# 15 #14 AND #8 AND #5 10,809

# 16 #14 AND #8 AND #5 Refined by: LANGUAGES: ( ENGLISH )

10,090

# 17 #14 AND #8 AND #5 Refined by: LANGUAGES: ( ENGLISH ) AND [excluding] DOCUMENT TYPES: ( LETTER OR EDITORIAL MATERIAL )

9,970

Web of Science SciELO

Dates of database coverage: 1997 – present. Data last updated 2018/04/24

Date searched: 24/04/2018

# 1 TOPIC: ("infect\* control\*" or (disease near/1 control\*) or (environ\* near/3 contaminat\*) or sterili?at\* or decontaminat\* or disinfect\* or clean or cleans or cleaned or cleaning or autoclave?) 6,235

# 2 TOPIC: ("dirty water" or "surface water" or rainwater or "rain water" or (water near/4 (puri\* or floccul\* or stagna\* or contaminat\* or recontaminat\* or re-contaminat\*)) or (water near/3 (quality or chlor\* or coagulation or turbidity or microbiol\* or pipe? or standpipe? or pump\* or handpump\* or distance or connect\* or access\* or quantity or quantities or volume? or sediment\*)) or (water near/2 (safe\* or unsafe\* or filtr\* or filter\* or supply or store? or storage or drink\* or consum\* or distribut\*)) or (water near/1 (treat\* or improv\* or radiat\* or irradiat\* or reserve?))) 8,097

# 3 TOPIC: (Hygien\* or (hand near/3 wash\*) or handwash\* or soap? or detergent? or "hand rub?" or "hand gel?" or "alcohol based gel?" or "alcohol based rub" or "wash\* facilit\*" or (water near/2 (laundry or wash\* or bath\*)) or sink? or basin? or faucet? or tap or taps or bucket?) 6,329

# 4 TOPIC: ((waste near/4 (medical or solid? or product\* or water or sharp? or hazard\* or organic\* or food\* or lab\* or surg\* or biolog\* or contaminat\* or infect\*)) or wastewater or "waste water"

or (inanimate near/2 environment\*) or sanita\* or toilet\* or latrine?  
or potty or potties or pit? or privy or privies or wc or "water  
closet?" or "pour flush" or shower? or sewerage or sewer? or "septic  
tank?" or "open defecation" or "grease trap?" or ((faeces or feces  
or faecal or fecal or excre\* or defecat\* or solids or waste or  
garbage or rubbish or sharps or softs or dressing? or needle? or  
scalpel?) near/3 (dispos\* or manag\* or service\* or collect\* or  
store\* or segregat\* or safe or treat\* or improv\* or microbiol\* or  
contaminat\* or recontaminat\* or "re-contaminat\*" or incinerat\* or  
burn\* or fire or compost\*)) or ((food? or medical or surg? or  
biolog\* or anatom\* or corpse? or cadaver?) near/3 (dispos\* or  
collect\* or store\* or segregat\* or incinerat\* or burn\* or fire)) or  
bin or bins or dustbin? or "garbage can?" or "personal protective  
equipment" or "safety box") 15,766

# 5 #4 OR #3 OR #2 OR #1 32,664

# 6 TOPIC: (hospital or hospitals or ((care or healthcare or  
health or medic\* or nurs\* or secondary or primary or tertiary or  
matern\* or birth\* or dentist or dental or child\* or neonat\* or baby  
or babies or paediatric? or pediatric? or geriatric? or outpatient?  
or "out patient?" or emergency or emergencies or psychiatric or  
mental or rehab\* or surgical or surgery or surgeries or "long stay?"  
or acute or "sub acute" or subacute or "intensive care" or burn? or  
stroke? or coronary or recovery or respiratory or operating) near/1  
(clinic or facility or facilities or centre? or center? or  
institution? or ward? or setting? or service? or room? or unit? or  
theatre? or theater?)) or (health near/1 (clinic or facility or  
facilities or institution? or ward? or setting? or service? or room?  
or unit? or theatre? or theater?)) or (delivery near/1 (clinic or  
facility or facilities or centre? or center? or institution? or  
ward? or setting? or room? or unit? or theatre? or theater?)) or  
health centre? or health center? or icu or nicu or "facility birth"  
or "facility based" or "facility care" or mortuary or mortuaries)  
46,610

# 7 TOPIC: ("healthcare worker?" or "health care worker?" or  
hcw or nurse? or doctor? or physician? or surgeon? or anaesthetist?  
or anesthetist? or anaesthesiologist? or dentist? or  
physiotherapist? or "physical therapist?" or dietician? or  
"occupational therapist?" or psychiatrist? or mortician? or  
coroner?) 13,777

# 8 #7 OR #6 55,146

# 9 TOPIC: (((developing or "less\* developed" or "under  
developed" or underdeveloped or "middle income" or "low\* income" or  
underserved or "under served" or deprived or poor\*) near/2 (economy  
or economies or countr\* or nation? or population? or world)) or  
(low\* near/2 (gdp or gnp or "gross domestic" or "gross national"))  
or lmic or lmics or "third world" or "lami countr\*" or "transitional  
countr\*" or "global south") 5,154

# 10 TOPIC: ((north korea or (democratic people\* republic near/2  
korea)) or cambodia or indonesia or kiribati or laos or (lao near/1  
"democratic republic") or "marshall island\*" or "caroline island\*"  
or "ellice island\*" or "gilbert island\*" or "johnston island\*" or  
"mariana island\*" or micronesia or mongolia or myanmar or burma or  
"papua new guinea" or philippines or "timor-leste" or vanuatu or  
"viet nam" or vietnam or "american samoa" or china or fiji or

malaysia or nauru or "independent state of samoa" or "western samoa" or "navigator islands" or "samoan islands" or thailand or tonga or tuvalu or afghanistan or nepal or bangladesh or bhutan or india or pakistan or "sri lanka" or ceylon or maldives) 3,879

# 11 TOPIC: (armenia or kosovo or (georgia near/2 republic) or kosovo or kyrgyzstan or "kyrgyz republic" or kirghizia or kirghiz or moldova or tajikistan or ukraine or uzbekistan or albania or azerbaijan or belarus or byelarus or belorussia or bosnia or herzegovina or bulgaria or croatia or kazakhstan or kazakh or macedonia or montenegro or romania or russia or ussr or "russian federation" or "union of soviet socialist republics" or "soviet union" or serbia or turkey or turkmenistan or yugoslavia or djibouti or "french somaliland" or egypt or jordan or morocco or syria or syrian arab republic or tunisia or gaza or yemen or algeria or iran or iraq or jordan or lebanon or libya) 2,798

# 12 TOPIC: (haiti or bolivia or "el salvador" or guatemala or honduras or nicaragua or argentina or belize or brazil or colombia or "costa rica" or cuba or dominica or "dominican republic" or ecuador or grenada or guyana or jamaica or mexico or panama or paraguay or peru or "saint lucia" or "st lucia" or grenadines or suriname or venezuela) 142,989

# 13 TOPIC: ("africa south of the sahara" or "sub-saharan africa" or "central africa" or "eastern africa" or "southern africa" or "western africa" or benin or dahomey or "burkina faso" or "burkina fasso" or "upper volta" or burundi or "central african republic" or "ubangi-shari" or chad or comoros or "comoro islands" or mayotte or "iles comores" or (democratic republic near/2 congo) or "belgian congo" or zaire or eritrea or ethiopia or gambia or (guinea not ("new guinea" or "guinea pig\*" or "guinea fowl")) or "guinea-bissau" or "portuguese guinea" or liberia or madagascar or "malagasy republic" or malawi or nyasaland or mali or mozambique or mocambique or "portuguese east africa" or (niger not (Aspergillus or Peptococcus or Schizothorax or Cruciferae or Gobius or Lasius or Agelastes or Melanosuchus or radish or Parastromateus or Orius or Apergillus or Parastromateus or Stomoxys)) or rwanda or ruanda or senegal or "sierra leone" or somalia or "south sudan" or tanzania or tanganyika or zanzibar or togo or "togolese republic" or uganda or zimbabwe or rhodesia or angola or cameroon or "cape verde" or "cabo verde" or (congo not (("democratic republic" near/3 congo) or "congo red" or "crimean congo")) or "cote d ivoire" or "cote divoire" or "ivory coast" or ghana or "gold coast" or kenya or lesotho or basutoland or mauritania or nigeria or ("sao tome" near/2 principe) or (sudan not "south sudan") or swaziland or zambia or "northern rhodesia" or botswana or bechuanaland or kalahari or "equatorial guinea" or "spanish guinea" or gabon or "gabonese republic" or mauritius or "agalega islands" or namibia or "south africa") 10,274

# 14 #13 OR #12 OR #11 OR #10 OR #9 160,363

# 15 #14 AND #8 AND #5 1,847

# 16 #14 AND #8 AND #5 Refined by: LANGUAGES: ( ENGLISH )

644
