# Supplementary material for: Interventions to improve water supply and quality, sanitation and handwashing facilities in healthcare facilities, and their effect on healthcare-associated infections in low-income and middle-income countries: a systematic review and supplementary scoping review
Source: PubMed Central journal article supplement — BMJ Glob Health. 2019 Jul 8;4(4):e001632. doi: 10.1136/bmjgh-2019-001632 (PMC6626521; doi:10.1136/bmjgh-2019-001632), 2019-07-08
Supplement: bmjgh-2019-001632supp003.pdf [file bmjgh-2019-001632supp003.pdf]

### Appendix 3: Characteristics of Included Studies (Systematic Review)

| Author              | Year | Title                                                                                                                                                                            | Study design                            | Country  | Urban/Rural | Study population                        | Population characteristics                                                                                                                                                        | Method of participant selection        | Sample size                                                                                                                                                                                       | Study duration | Type of facility    |
|---------------------|------|----------------------------------------------------------------------------------------------------------------------------------------------------------------------------------|-----------------------------------------|----------|-------------|-----------------------------------------|-----------------------------------------------------------------------------------------------------------------------------------------------------------------------------------|----------------------------------------|---------------------------------------------------------------------------------------------------------------------------------------------------------------------------------------------------|----------------|---------------------|
| Korbkitjaroen et al | 2011 | Effectiveness of comprehensive implementation of individualized bundling infection control measures for prevention of health care-associated infections in general medical wards | Cluster RCT                             | Thailand | Urban       | Adult patients in general medical wards | Newly hospitalized patients in such general medical wards staying longer than 48 hours during the study period                                                                    | Patients in the participating wards    | 4 control wards and 4 intervention wards<br><br>There were 954 patients (9,650 hospitalization-days) in the intervention wards and 920 patients (9,777 hospitalization-days) in the control wards | 4 months       | Tertiary - hospital |
| Chen et al          | 2015 | Integrated measures for prevention of invasive Candida infections in preterm infants in a Chinese neonatal intensive care unit                                                   | Retrospective cohort with control group | China    | Urban       | Neonates (pre-term)                     | Preterm infants with gestational age (GA) <33 weeks and at least 7 days old admitted between 2010 and 2013                                                                        | Patients admitted during certain times | 261 pre-term infants                                                                                                                                                                              | 48 months      | Tertiary - hospital |
| Raza and Avan       | 2013 | Disposable clean delivery kits and prevention of neonatal tetanus in the presence of skilled birth attendants                                                                    | Matched case-control                    | Pakistan | Urban       | Neonates                                | Cases: infants who had been diagnosed with neonatal tetanus (NNT)<br>Controls: infants who survived the neonatal period and whose mothers had no history of tetanus immunization. | Hospital records                       | 140 cases and 280 controls                                                                                                                                                                        | 25 months      | Tertiary - hospital |

| Author              | Year | Intervention                                                                                  | Description of the overall intervention                                                                                                                                                                                                                                                                                                                                                                                                                                                                                                                                                         | WASH only/Combined | WASH intervention description                                                    | Length of the intervention | Length of post-intervention follow up | Definition of HCAI used                                                                                                                                                                                                                                          |
|---------------------|------|-----------------------------------------------------------------------------------------------|-------------------------------------------------------------------------------------------------------------------------------------------------------------------------------------------------------------------------------------------------------------------------------------------------------------------------------------------------------------------------------------------------------------------------------------------------------------------------------------------------------------------------------------------------------------------------------------------------|--------------------|----------------------------------------------------------------------------------|----------------------------|---------------------------------------|------------------------------------------------------------------------------------------------------------------------------------------------------------------------------------------------------------------------------------------------------------------|
| Korbkitjaroen et al | 2011 | Individualised Bundled infection control practices - including hand hygiene and sterilization | Each patient in the intervention ward was visited by the infection control team once a day until he or she left the hospital. The infection control team identified risk factors for developing HAI in each patient, coordinated with the local health care team to eliminate or minimize such risk factors, and encouraged responsible personnel to comply with the appropriate infection control measures for each patient                                                                                                                                                                    | Combined           | Hand hygiene and sterilization of skin and equipment                             | 4 months                   | 0 months                              | CDC National Healthcare Safety Network's surveillance definition of HAI                                                                                                                                                                                          |
| Chen et al          | 2015 | Hand hygiene education                                                                        | <p>The control group (CG) only had routine measures for prevention of nosocomial infections, including disinfection and sterilization, isolation of patients, control of risk factors, and education and training of medical staff.</p> <p>In the fluconazole group (FG), in addition to routine preventive measures, all eligible infants received fluconazole.</p> <p>The integrated measures group (IMG) had routine preventive measures and fluconazole prophylaxis, and also the management and supervision of hand hygiene was emphasized (posters), training lectures, observations.</p> | Combined           | Hand hygiene - education, management and supervision of hand hygiene (IMG group) | 12 months                  | N/R                                   | N/R                                                                                                                                                                                                                                                              |
| Raza and Avan       | 2013 | Provision of disposable clean care delivery kits                                              | Provision of clean delivery kits which include: soap, plastic sheet, clean string for tying the umbilical cord, clean razor blade, gauze/spirit for clean cord care                                                                                                                                                                                                                                                                                                                                                                                                                             | Combined           | Clean delivery kits included soap                                                | 25 months                  | N/A                                   | NNT was diagnosed if the following signs and symptoms occurred in sequence: history of normal suck and cry for the first two days of life; history of onset of illness between 3 and 28 days of age; history of inability to suck; stiffness and/or convulsions. |

| Author              | Year | Primary outcome                       | Secondary outcomes                                      | Additional outcomes | Laboratory-based measurement                 | Effect estimate                                                                                                                                                                                                                                                                                                                                                                                                                                                                                                                                                                                                                                                                                                                                                                                                                                                                                                                                             | Process and implementation factors | Intervention uptake | Cost of intervention |
|---------------------|------|---------------------------------------|---------------------------------------------------------|---------------------|----------------------------------------------|-------------------------------------------------------------------------------------------------------------------------------------------------------------------------------------------------------------------------------------------------------------------------------------------------------------------------------------------------------------------------------------------------------------------------------------------------------------------------------------------------------------------------------------------------------------------------------------------------------------------------------------------------------------------------------------------------------------------------------------------------------------------------------------------------------------------------------------------------------------------------------------------------------------------------------------------------------------|------------------------------------|---------------------|----------------------|
| Korbkitjaroen et al | 2011 | Overall HCAI<br>CAUTI<br>VAP<br>CABSI | Mortality due to HCAI<br><br>Length of stay in hospital | N/R                 | N/R                                          | <p>The overall prevalence of HCAI was significantly lower in the intervention wards compared with the control wards (5.6%, or 5.5 episodes/1,000 hospitalization-days vs 9.2%, or 8.7 episodes/1,000 hospitalization-days)(P = 0 .003).</p> <p>The rates of VAP and CAUTI were also significantly lower in the patients in the intervention wards.</p> <p>VAP intervention (6.5 episodes per 1000 respirator days) vs VAP control (16.3 episodes per 1000 respirator days) P = 0.009</p> <p>CAUTI intervention (2.9 episodes per 1000 catheter days) CAUTI (7.3 episodes per 1000 catheter days) P= 0.013</p> <p>The rate of CABSI did not differ significantly between the 2 groups<br/>CABSI intervention (2.9 episodes per 1000 catheter days) CAUTI (3.9 episodes per 1000 catheter days) P= 0.84</p> <p>Mortality due to HCAI intervention (15%) Control (37%) P= 0.07</p> <p>Length of stay intervention (42.15 days) control (45.49 days) P=0.52</p> | N/R                                | N/R                 | N/R                  |
| Chen et al          | 2015 | Invasive Candida infections (ICIs)    | Mortality of patients with ICI                          | N/R                 | Blood, urine, or cerebrospinal fluid culture | <p>The incidence of ICI differed significantly among the study groups: 23.3% (21/94) in the CG, 18.2% (18/99) in the FG, and only 2.9% (2/68) in the IMG (P ¼.003).<br/>ICI was significantly less frequent in the IMG compared with the CG (P &lt;.001) and FG (P 0.003); however, there was no significant difference between the CG and the FG (P = 0.50).</p> <p>Overall mortality in the infants with ICI was 7.3% (3/41), including 9.5% (2/21) in the CG, 5.6% (1/18) in the FG, and 0 in the IMG.</p>                                                                                                                                                                                                                                                                                                                                                                                                                                               | N/R                                | N/R                 | N/R                  |
| Raza and Avan       | 2013 | Neonatal tetanus (NNT)                | N/R                                                     | N/R                 | N/R                                          | <p>After adjustment for socioeconomic factors, clean delivery care kits were independently associated with NNT (adjusted matched odds ratio [mOR] 2.0; 95% confidence interval [CI], 1.3–3.1). The association with clean delivery care kits remained significant when additionally adjusted for skilled birth attendants (mOR 2.0; 95% CI, 1.0–3.9; P=0.05).</p>                                                                                                                                                                                                                                                                                                                                                                                                                                                                                                                                                                                           | N/R                                | N/R                 | N/R                  |
