# Supplementary material for: Interventions to improve water supply and quality, sanitation and handwashing facilities in healthcare facilities, and their effect on healthcare-associated infections in low-income and middle-income countries: a systematic review and supplementary scoping review
Source: PubMed Central journal article supplement — BMJ Glob Health. 2019 Jul 8;4(4):e001632. doi: 10.1136/bmjgh-2019-001632 (PMC6626521; doi:10.1136/bmjgh-2019-001632), 2019-07-08
Supplement: bmjgh-2019-001632supp004.pdf [file bmjgh-2019-001632supp004.pdf]

## Appendix 4: Risk of Bias Assessment

### Cochrane Risk of Bias Tool

| Study                      | Random sequence generation (selection bias)                             | Allocation concealment (selection bias)                                 | Selective Reporting (reporting bias)                    | Blinding of participants and personnel (performance bias) | Blinding of outcome assessment (detection bias) | Incomplete outcome data (attrition bias) | Other bias                                                                                              |
|----------------------------|-------------------------------------------------------------------------|-------------------------------------------------------------------------|---------------------------------------------------------|-----------------------------------------------------------|-------------------------------------------------|------------------------------------------|---------------------------------------------------------------------------------------------------------|
| Korbkitjaroen et al (2011) | Unclear risk<br>Reason: randomisation mentioned but method no specified | Unclear risk<br>Reason: randomisation mentioned but method no specified | Low risk<br>Reason: All pre-specified outcomes reported | High risk<br>Reason: no blinding                          | Unclear risk<br>Reason: not specified           | Low risk<br>Reason: no missing data      | High risk<br>Reason: did not control for possible confounders or adjust for clustering within the wards |

### Newcastle-Ottawa Risk of Bias Tool for Cohort Studies

| Study: Chen et al, 2015                                                                                                                                                                                                                                                                                                | Score         |
|------------------------------------------------------------------------------------------------------------------------------------------------------------------------------------------------------------------------------------------------------------------------------------------------------------------------|---------------|
| Selection                                                                                                                                                                                                                                                                                                              |               |
| 1) Representativeness of the exposed cohort?:<br>a) truly representative of the average pre-term infant in the community *<br>b) somewhat representative of the average pre-term infant in the community *<br>c) selected groups of users e.g. nurses, volunteers<br>d) no description of the derivation of the cohort | (b) = 1 point |
| 2) Selection of the non-exposed cohort:<br>a) drawn from the same community as the exposed cohort *<br>b) drawn from a different source<br>c) no description of the derivation of the non-exposed cohort                                                                                                               | (a) = 1 point |
| 3) Ascertainment of exposure:<br>a) secure record (e.g. surgical records) *<br>b) structured interview *<br>c) self-written report<br>d) no description                                                                                                                                                                | (a) = 1 point |
| 4) Demonstration that an outcome of interest was not present at the start of a study:<br>a) Yes *<br>b) No                                                                                                                                                                                                             | (a) = 1 point |
| Comparability                                                                                                                                                                                                                                                                                                          |               |

|                                                                                                                                                                                                                                                                                                                                                                                                                     |                |
|---------------------------------------------------------------------------------------------------------------------------------------------------------------------------------------------------------------------------------------------------------------------------------------------------------------------------------------------------------------------------------------------------------------------|----------------|
| <p>1) Comparability of cohorts on the basis of the design or analysis:</p> <p>a) study controls for age and sex (select the most important factor) *</p> <p>b) Study controls for any additional factor * (This criterion could be modified to indicate specific control for a second important factor.)</p> <p>c) Cohorts are not comparable on the basis of the design or analysis controlled for confounders</p> | (c) = 0 points |
| Outcome                                                                                                                                                                                                                                                                                                                                                                                                             |                |
| <p>1) Assessment of outcome:</p> <p>a) independent blind assessment *</p> <p>b) record linkage *</p> <p>c) self-report</p> <p>d) no description</p>                                                                                                                                                                                                                                                                 | (a) = 1 point  |
| <p>2) Was follow-up long enough for outcomes to occur?</p> <p>a) yes (select an adequate follow up period for outcome of interest) *</p> <p>b) no</p>                                                                                                                                                                                                                                                               | a) = 1 point   |
| <p>3) Adequacy of follow-up of cohorts</p> <p>a) complete follow up - all subjects accounted for *</p> <p>b) subjects lost to follow up unlikely to introduce bias - small number lost - &gt; ____ % (select an adequate %) follow up, or description provided of those lost) *</p> <p>c) follow up rate &lt; ____% (select an adequate %) and no description of those lost</p>                                     | (d) = 0 points |

|                 |          |
|-----------------|----------|
| d) no statement |          |
| Total score     | 6 points |

*Note: A study can be awarded a maximum of one star for each numbered item within the Selection and Outcome categories. A maximum of two stars can be given for Comparability*

**Newcastle-Ottawa Risk of Bias Tool for Case-Control Studies**

| Study: Raza and Avan, 2013                                                                                                                                                                                                               | Score                            |
|------------------------------------------------------------------------------------------------------------------------------------------------------------------------------------------------------------------------------------------|----------------------------------|
| Selection                                                                                                                                                                                                                                |                                  |
| 1) Is the case definition accurate?:<br>a) yes, with independent validation*<br>b) yes, e.g. record linkage or based on self reports<br>c) no description                                                                                | (a) = 1 point                    |
| 2) Representativeness of the cases:<br>a) consecutive or obviously representative series of cases *<br>b) potential for selection biases or not stated                                                                                   | (a) = 1 point                    |
| 3) Selection on controls:<br>a) community controls *<br>b) hospital controls<br>c) no description                                                                                                                                        | (a) = 1 point                    |
| 4) Definition of controls:<br>a) No history of disease (endpoint)*<br>b) No description of source                                                                                                                                        | (b) = 0 point                    |
| Comparability                                                                                                                                                                                                                            |                                  |
| 1) Comparability of cases and controls on the basis of the design or analysis:<br>a) study controls for gender, area of residence, date of birth *<br>b) Study controls for any additional factor – area of residence and date of birth* | (a) = 1 points<br>(b) = 1 points |

|                                                                                                                                                                                                                                                                       |                |
|-----------------------------------------------------------------------------------------------------------------------------------------------------------------------------------------------------------------------------------------------------------------------|----------------|
| c) Cases and controls are not comparable on the basis of the design or analysis controlled for confounders                                                                                                                                                            |                |
| Exposure                                                                                                                                                                                                                                                              |                |
| 1) Ascertainment of exposure:<br>a) a secure record (e.g. surgical record) *<br>b) structured interview where blind to case/control status *<br>c) interview not blinded to case/control status<br>d) written self-report or medical record only<br>e) no description | (a) = 1 point  |
| 2) Same method of ascertainment for cases and controls?<br>a) yes *<br>b) no                                                                                                                                                                                          | a) = 1 point   |
| 3) Non-response rate<br>a) same rate for both groups *<br>b) non-respondents described<br>c) rate different and no designation                                                                                                                                        | (c) = 0 points |
| Total score                                                                                                                                                                                                                                                           | 7 points       |

*Note: A study can be awarded a maximum of one star for each numbered item within the Selection and Outcome categories. A maximum of two stars can be given for Comparability*
