# Supplementary material for: Interventions to improve water supply and quality, sanitation and handwashing facilities in healthcare facilities, and their effect on healthcare-associated infections in low-income and middle-income countries: a systematic review and supplementary scoping review
Source: PubMed Central journal article supplement — BMJ Glob Health. 2019 Jul 8;4(4):e001632. doi: 10.1136/bmjgh-2019-001632 (PMC6626521; doi:10.1136/bmjgh-2019-001632), 2019-07-08
Supplement: bmjgh-2019-001632supp005.pdf [file bmjgh-2019-001632supp005.pdf]

**Appendix 5: Characteristics of before-after studies (scoping review)**

| Study # | Author          | Year | Title                                                                                                                                                                                                                   | Study design | Country | Urban/Rural | Study population   | Population characteristics                           | Method of participant selection                                                         | Sample size  | Study duration | Type of facility    | Intervention                                            |
|---------|-----------------|------|-------------------------------------------------------------------------------------------------------------------------------------------------------------------------------------------------------------------------|--------------|---------|-------------|--------------------|------------------------------------------------------|-----------------------------------------------------------------------------------------|--------------|----------------|---------------------|---------------------------------------------------------|
| 1       | Abramczyk et al | 2011 | Preventing catheter-associated infections in the Pediatric Intensive Care Unit: impact of an educational program surveying policies for insertion and care of central venous catheters in a Brazilian teaching hospital | Before-After | Brazil  | Urban       | Pediatric patients | Patients in the pediatric ICU for more than 24 hours | All patients visiting the unit for more than 24 hours during study period were enrolled | 255 Patients | 16 months      | Tertiary - hospital | Educational program<br>- Disinfection of hub connection |

| Study # | Author           | Year | Title                                                                                                                                                  | Study design | Country                                             | Urban/Rural     | Study population                                           | Population characteristics                                                                         | Method of participant selection                                                        | Sample size                                                                                                               | Study duration | Type of facility    | Intervention                                                             |
|---------|------------------|------|--------------------------------------------------------------------------------------------------------------------------------------------------------|--------------|-----------------------------------------------------|-----------------|------------------------------------------------------------|----------------------------------------------------------------------------------------------------|----------------------------------------------------------------------------------------|---------------------------------------------------------------------------------------------------------------------------|----------------|---------------------|--------------------------------------------------------------------------|
| 2       | Allegranzi et al | 2018 | A multimodal infection control and patient safety intervention to reduce surgical site infections in Africa: a multicentre, before-after, cohort study | Before-After | Kenya, Uganda (two hospitals), Zambia, and Zimbabwe | Urban and Rural | All-age patients admitted to the HCF for a major operation | Patients receiving major elective and emergency operations in the HCFs were eligible for inclusion | Patients receiving major elective and emergency operations were eligible for inclusion | 4 hospitals. 4322 operations were followed up (1604 at baseline, 1827 at follow-up, and 891 in the sustainability period) | 30 months      | Tertiary - hospital | Multimodal intervention including provision of antiseptics and education |

| Study # | Author    | Year | Title                                                                                                                                | Study design                                                | Country | Urban/Rural | Study population           | Population characteristics | Method of participant selection | Sample size                                            | Study duration       | Type of facility    | Intervention                                                                                                 |
|---------|-----------|------|--------------------------------------------------------------------------------------------------------------------------------------|-------------------------------------------------------------|---------|-------------|----------------------------|----------------------------|---------------------------------|--------------------------------------------------------|----------------------|---------------------|--------------------------------------------------------------------------------------------------------------|
| 3       | Alp et al | 2014 | Evaluation of the effectiveness of an infection control program in adult intensive care units: a report from a middle-income country | ITS but data collected and analysed as a Before-After study | Turkey  | Urban       | Adults patients in the ICU | Patients in ICU            | Patient records                 | Number of patients N/R<br><br>4 ICUs within 1 hospital | 9 years (108 months) | Tertiary - hospital | Increased hand basins and alcohol-based hand rub availability phased in along with wider intervention bundle |

| Study # | Author               | Year | Title                                                                                                                                                                                     | Study design | Country  | Urban/Rural | Study population                         | Population characteristics                          | Method of participant selection | Sample size                                                                                                                                                                                                       | Study duration | Type of facility              | Intervention                                |
|---------|----------------------|------|-------------------------------------------------------------------------------------------------------------------------------------------------------------------------------------------|--------------|----------|-------------|------------------------------------------|-----------------------------------------------------|---------------------------------|-------------------------------------------------------------------------------------------------------------------------------------------------------------------------------------------------------------------|----------------|-------------------------------|---------------------------------------------|
| 4       | Alvarez-Moreno et al | 2016 | Multicenter study in Colombia: Impact of a multidimensional International Nosocomial Infection Control Consortium (INICC) approach on central line-associated bloodstream infection rates | Before-After | Colombia | Urban       | Pediatric and adult patients in the ICUs | Patients in adult ICU and patients in pediatric ICU | N/R                             | Total of 2,988 patients, hospitalized for 17,370 days, with a total of 13,263 CL days, at 4 hospitals in the following 3 types of ICUs: pediatric (n = 424), coronary (n = 373), and medical-surgical (n = 2,191) | 83 months      | Secondary/Tertiary - hospital | Multidimensional infection control approach |

| Study # | Author                | Year | Title                                                                                                                                                                                                                                                                       | Study design | Country  | Urban/Rural | Study population                                       | Population characteristics                                                                        | Method of participant selection | Sample size   | Study duration | Type of facility    | Intervention                                         |
|---------|-----------------------|------|-----------------------------------------------------------------------------------------------------------------------------------------------------------------------------------------------------------------------------------------------------------------------------|--------------|----------|-------------|--------------------------------------------------------|---------------------------------------------------------------------------------------------------|---------------------------------|---------------|----------------|---------------------|------------------------------------------------------|
| 5       | Apisarnthanarak et al | 2014 | Effectiveness of infection prevention measures featuring advanced source control and environmental cleaning to limit transmission of extremely-drug resistant <i>Acinetobacter baumannii</i> in a Thai intensive care unit: An analysis before and after extensive flooding | Before-After | Thailand | Urban       | All patients admitted to the medical ICU and intubated | All patients admitted to the medical ICU between May 1, 2011, and December 31, 2012 and intubated | All patients                    | 1365 patients | 30 months      | Tertiary - hospital | Disinfection and hygiene among a larger intervention |

| Study # | Author                | Year | Title                                                                                                              | Study design | Country  | Urban/Rural | Study population                                 | Population characteristics                                                                                                    | Method of participant selection                                             | Sample size   | Study duration | Type of facility    | Intervention                        |
|---------|-----------------------|------|--------------------------------------------------------------------------------------------------------------------|--------------|----------|-------------|--------------------------------------------------|-------------------------------------------------------------------------------------------------------------------------------|-----------------------------------------------------------------------------|---------------|----------------|---------------------|-------------------------------------|
| 6       | Apisarnthanarak et al | 2010 | Effectiveness of a catheter-associated bloodstream infection bundle in a Thai tertiary care center: a 3-year study | Before-After | Thailand | Urban       | All patients age 15 years or older who had a CVC | All consecutive patients age 15 years or older admitted to the hospital in all units between July 1, 2005, and June 30, 2008. | All hospitalized patients age 15 years or older who had a CVC were enrolled | 3369 patients | 36 months      | Tertiary - hospital | Bundled infection control practices |

| Study # | Author     | Year | Title                                                                                                                  | Study design | Country | Urban/Rural | Study population    | Population characteristics                              | Method of participant selection | Sample size  | Study duration | Type of facility    | Intervention          |
|---------|------------|------|------------------------------------------------------------------------------------------------------------------------|--------------|---------|-------------|---------------------|---------------------------------------------------------|---------------------------------|--------------|----------------|---------------------|-----------------------|
| 7       | Azab et al | 2015 | Reducing ventilator-associated pneumonia in neonatal intensive care unit using "VAP prevention Bundle": a cohort study | Before-After | Egypt   | Urban       | Neonates in the ICU | Neonates who had mechanical ventilation for $\geq 48$ h | All patients included           | 143 patients | 15 months      | Tertiary - hospital | VAP prevention bundle |



| Study # | Author          | Year | Title                                                                                                                                                                                                                     | Study design | Country | Urban/Rural | Study population      | Population characteristics                      | Method of participant selection                                          | Sample size   | Study duration | Type of facility              | Intervention                         |
|---------|-----------------|------|---------------------------------------------------------------------------------------------------------------------------------------------------------------------------------------------------------------------------|--------------|---------|-------------|-----------------------|-------------------------------------------------|--------------------------------------------------------------------------|---------------|----------------|-------------------------------|--------------------------------------|
| 8       | Guanche-Garcell | 2013 | Effectiveness of a multidimensional approach for the prevention of ventilator-associated pneumonia in an adult intensive care unit in Cuba: findings of the International Nosocomial Infection Control Consortium (INICC) | Before-After | Cuba    | Urban       | Adult patients in ICU | Adult patients on mechanical ventilation in ICU | All adult patients on mechanical ventilation in ICU at time of the study | 1075 patients | 50 months      | Secondary/Tertiary - hospital | Bundle of Infection control measures |

| Study # | Author     | Year | Title                                                                                                                                                                                                      | Study design | Country | Urban/Rural | Study population | Population characteristics | Method of participant selection | Sample size    | Study duration | Type of facility              | Intervention                                                                     |
|---------|------------|------|------------------------------------------------------------------------------------------------------------------------------------------------------------------------------------------------------------|--------------|---------|-------------|------------------|----------------------------|---------------------------------|----------------|----------------|-------------------------------|----------------------------------------------------------------------------------|
| 9       | Jagi et al | 2013 | Impact of an international nosocomial infection control consortium multidimensional approach on central line-associated bloodstream infection rates in adult intensive care units in eight cities in India | Before-After | India   | Urban       | Adults in ICUs   | Adults in the ICU          | All ICU hospital patients       | 35650 patients | 126 months     | Secondary/Tertiary - hospital | Hand hygiene, disinfecting skin and medical equipment among a wider intervention |

| Study # | Author              | Year | Title                                                                                                                                                                                                                                     | Study design | Country   | Urban/Rural | Study population    | Population characteristics            | Method of participant selection                       | Sample size                                               | Study duration | Type of facility              | Intervention                                                                                   |
|---------|---------------------|------|-------------------------------------------------------------------------------------------------------------------------------------------------------------------------------------------------------------------------------------------|--------------|-----------|-------------|---------------------|---------------------------------------|-------------------------------------------------------|-----------------------------------------------------------|----------------|-------------------------------|------------------------------------------------------------------------------------------------|
| 10      | Kurlat et al        | 1998 | Infection control strategies in a neonatal intensive care unit in Argentina                                                                                                                                                               | Before-After | Argentina | Urban       | Neonates in ICU     | Neonatal intensive care unit patients | All patients admitted to the NICU during study period | 725 neonates at baseline<br>728 neonates end line         | 24 months      | Tertiary - hospital           | Guidelines created and staff trained in guidelines which include handwashing and sterilization |
| 11      | Leblebicioglu et al | 2013 | Impact of a multidimensional infection control approach on catheter-associated urinary tract infection rates in adult intensive care units in 10 cities of Turkey: International Nosocomial Infection Control Consortium findings (INICC) | Before-After | Turkey    | Urban       | All patients in ICU | Patients in ICU                       | All ICU patients in the hospitals during study period | 4231 patients in 13 ICUs in 10 hospitals across 10 cities | 82 months      | Secondary/Tertiary - hospital | Mixed approach including hand hygiene and sterilization of equipment                           |

| Study # | Author              | Year | Title                                                                                                                                                                                                                                              | Study design | Country | Urban/Rural | Study population      | Population characteristics | Method of participant selection                   | Sample size                                  | Study duration | Type of facility              | Intervention                                                         |
|---------|---------------------|------|----------------------------------------------------------------------------------------------------------------------------------------------------------------------------------------------------------------------------------------------------|--------------|---------|-------------|-----------------------|----------------------------|---------------------------------------------------|----------------------------------------------|----------------|-------------------------------|----------------------------------------------------------------------|
| 12      | Leblebicioglu et al | 2013 | Impact of a multidimensional infection control approach on central line-associated bloodstream infections rates in adult intensive care units of 8 cities of Turkey: findings of the International Nosocomial Infection Control Consortium (INICC) | Before-After | Turkey  | Urban       | Adult patients in ICU | Patients in ICU            | All ICU adult patients in participating hospitals | 4017 patients in 13 ICUs across 13 hospitals | 76 months      | Secondary/Tertiary - hospital | Mixed approach including hand hygiene and sterilization of equipment |

| Study # | Author              | Year | Title                                                                                                                                                                                                                                   | Study design | Country | Urban/Rural | Study population      | Population characteristics | Method of participant selection                   | Sample size                                 | Study duration | Type of facility              | Intervention                                                         |
|---------|---------------------|------|-----------------------------------------------------------------------------------------------------------------------------------------------------------------------------------------------------------------------------------------|--------------|---------|-------------|-----------------------|----------------------------|---------------------------------------------------|---------------------------------------------|----------------|-------------------------------|----------------------------------------------------------------------|
| 13      | Leblebicioglu et al | 2013 | Effectiveness of a multidimensional approach for prevention of ventilator-associated pneumonia in 11 adult intensive care units from 10 cities of Turkey: findings of the International Nosocomial Infection Control Consortium (INICC) | Before-After | Turkey  | Urban       | Adult patients in ICU | Patients in ICU            | All ICU adult patients in participating hospitals | 4312 across 11 adult ICUs from 10 hospitals | 64 months      | Secondary/Tertiary - hospital | Mixed approach including hand hygiene and sterilization of equipment |

| Study # | Author     | Year | Title                                                                                                                             | Study design | Country   | Urban/Rural | Study population          | Population characteristics                                                  | Method of participant selection                                                                                                                                                                                                                                                    | Sample size                | Study duration | Type of facility              | Intervention                                                                                                 |
|---------|------------|------|-----------------------------------------------------------------------------------------------------------------------------------|--------------|-----------|-------------|---------------------------|-----------------------------------------------------------------------------|------------------------------------------------------------------------------------------------------------------------------------------------------------------------------------------------------------------------------------------------------------------------------------|----------------------------|----------------|-------------------------------|--------------------------------------------------------------------------------------------------------------|
| 14      | Lenz et al | 2018 | Impact of a program aimed at reducing catheter-related infections implemented in nine pediatric intensive care units in Argentina | Before-After | Argentina | Urban       | Pediatric patients in ICU | Pediatric patients who had a central venous catheter during hospitalization | All patients in the pediatric ICUs. PICUs were selected from public hospitals based on their prior participation in a quality improvement program that had been implemented within 3 years earlier and their compliance with implementation and recording feasibility requirements | 9 PICUs across 7 hospitals | 11 months      | Secondary/Tertiary - hospital | A bundle of measures based on health care staff training on catheter insertion, hand hygiene, and checklists |

| Study # | Author      | Year | Title                                                                                                                                                                                                                                  | Study design | Country | Urban/Rural | Study population                                  | Population characteristics                                                | Method of participant selection                    | Sample size                                    | Study duration | Type of facility              | Intervention                                                                                                             |
|---------|-------------|------|----------------------------------------------------------------------------------------------------------------------------------------------------------------------------------------------------------------------------------------|--------------|---------|-------------|---------------------------------------------------|---------------------------------------------------------------------------|----------------------------------------------------|------------------------------------------------|----------------|-------------------------------|--------------------------------------------------------------------------------------------------------------------------|
| 15      | Marra et al | 2010 | Impact of a program to prevent central line-associated bloodstream infection in the zero tolerance era                                                                                                                                 | Before-After | Brazil  | Urban       | All patients in the ICU and SDU (step-down units) | All ICU and SDU (step-down units) patients requiring central venous lines | All patients in the ICUs, SDUs during study period | Total patient days = 99,165 days               | 48 months      | Tertiary - hospital           | Intervention bundle including hand hygiene and sterilization                                                             |
| 16      | Mehta et al | 2013 | Effectiveness of a multidimensional approach for prevention of ventilator-associated pneumonia in 21 adult intensive-care units from 10 cities in India: findings of the International Nosocomial Infection Control Consortium (INICC) | Before-After | India   | Urban       | Adult patients in ICU                             | Adult patients in ICU                                                     | All ICU adult patients at time of study            | 46,954 patients from 21 ICUs from 14 hospitals | 87 months      | Secondary/Tertiary - hospital | Bundle which included adherence to hand hygiene (HH) guidelines and oral care with antiseptic solution among many others |

| Study # | Author      | Year | Title                                                                                                                               | Study design | Country   | Urban/Rural | Study population                                 | Population characteristics                                                                                | Method of participant selection                                                              | Sample size               | Study duration | Type of facility    | Intervention                                     |
|---------|-------------|------|-------------------------------------------------------------------------------------------------------------------------------------|--------------|-----------|-------------|--------------------------------------------------|-----------------------------------------------------------------------------------------------------------|----------------------------------------------------------------------------------------------|---------------------------|----------------|---------------------|--------------------------------------------------|
| 17      | Murni et al | 2015 | Reducing hospital-acquired infections and improving the rational use of antibiotics in a developing country: an effectiveness study | Before-After | Indonesia | Urban       | Pediatric patients in the ICU and pediatric ward | Pediatric patients who were expected to remain in the pediatric wards or pediatric ICU for more than 48 h | All children admitted to the pediatric intensive care unit and pediatric wards were observed | 1 hospital, 2646 patients | 27 months      | Tertiary - hospital | Multifaceted intervention including hand hygiene |



| Study # | Author      | Year | Title                                                                                                                                                                                                                                                                 | Study design | Country     | Urban/Rural | Study population | Population characteristics | Method of participant selection         | Sample size                                         | Study duration | Type of facility              | Intervention                                                                                   |
|---------|-------------|------|-----------------------------------------------------------------------------------------------------------------------------------------------------------------------------------------------------------------------------------------------------------------------|--------------|-------------|-------------|------------------|----------------------------|-----------------------------------------|-----------------------------------------------------|----------------|-------------------------------|------------------------------------------------------------------------------------------------|
| 18      | Navoa et al | 2013 | Impact of an International Nosocomial Infection Control Consortium multidimensional approach on catheter-associated urinary tract infections in adult intensive care units in the Philippines: International Nosocomial Infection Control Consortium (INICC) findings | Before-After | Philippines | Urban       | Adults in ICUs   | Adults in ICU              | All patients in ICU during study period | 3183 patients hospitalized in 4 ICUS in 2 hospitals | 60 months      | Secondary/Tertiary - hospital | Multidimensional approach including hand hygiene sterilization guidelines among other measures |

| Study # | Author       | Year | Title                                                                                                               | Study design                                                | Country  | Urban/Rural | Study population          | Population characteristics                                                         | Method of participant selection                  | Sample size                            | Study duration | Type of facility    | Intervention                                                                     |
|---------|--------------|------|---------------------------------------------------------------------------------------------------------------------|-------------------------------------------------------------|----------|-------------|---------------------------|------------------------------------------------------------------------------------|--------------------------------------------------|----------------------------------------|----------------|---------------------|----------------------------------------------------------------------------------|
| 19      | Ng Y.Y et al | 2015 | Impact of infection control training for interns on PICU-acquired bloodstream infections in a middle-income country | ITS but data collected and analyzed as a Before-After study | Malaysia | Urban       | Pediatric patients in ICU | Pediatric patients admitted to the ICU between 1 January 2008 and 31 December 2009 | All patients admitted to ICU during study period | 721 PICU patients.<br>1 medical centre | 24 months      | Tertiary - hospital | Training in hand hygiene and aseptic techniques for accessing vascular catheters |

| Study # | Author       | Year | Title                                                                                             | Study design | Country | Urban/Rural | Study population                      | Population characteristics                                                                                                               | Method of participant selection                                         | Sample size              | Study duration | Type of facility    | Intervention                                                                   |
|---------|--------------|------|---------------------------------------------------------------------------------------------------|--------------|---------|-------------|---------------------------------------|------------------------------------------------------------------------------------------------------------------------------------------|-------------------------------------------------------------------------|--------------------------|----------------|---------------------|--------------------------------------------------------------------------------|
| 20      | Ogwang et al | 2013 | Prevalence of hospital-associated infections can be decreased effectively in developing countries | Before-After | Uganda  | Urban       | All patients in acute care unit (ACU) | All patients in ACU admitted to hospital not less than two days before the survey were eligible to participate in the prevalence survey. | Eligible patients were identified by examining inpatient medical charts | 728 patients, 1 hospital | 20 months      | Tertiary - hospital | Infection control Programme including hand hygiene, disinfection of skin, etc. |

| Study # | Author          | Year | Title                                                                                                                                 | Study design | Country   | Urban/Rural | Study population                                    | Population characteristics                               | Method of participant selection                            | Sample size                                                              | Study duration | Type of facility    | Intervention                                |
|---------|-----------------|------|---------------------------------------------------------------------------------------------------------------------------------------|--------------|-----------|-------------|-----------------------------------------------------|----------------------------------------------------------|------------------------------------------------------------|--------------------------------------------------------------------------|----------------|---------------------|---------------------------------------------|
| 21      | Rosenthal et al | 2006 | Impact of an infection control program on rates of ventilator-associated pneumonia in intensive care units in 2 Argentinean hospitals | Before-After | Argentina | Urban       | Adult patients in ICU and on mechanical ventilation | All adult patients who received MV for at least 24 hours | All eligible patients who were admitted to the study units | 801 patients in 4 ICUs in 2 hospitals                                    | 24 months      | Tertiary - hospital | Multi-component Infection control programme |
| 22      | Rosenthal et al | 2005 | Reduction in nosocomial infection with improved hand hygiene in intensive care units of a tertiary care hospital in Argentina         | Before-After | Argentina | Urban       | All patients in ICUs                                | All patients in ICUs                                     | All patients in ICUs during study period                   | 9596 bed days<br>2 ICUs, 1 hospital<br><br>*number of patients not given | 21 months      | Tertiary - hospital | Hand hygiene                                |

| Study # | Author          | Year | Title                                                                                                                                                                                                                                                        | Study design | Country                                         | Urban/Rural | Study population           | Population characteristics | Method of participant selection           | Sample size                              | Study duration | Type of facility              | Intervention                                                                             |
|---------|-----------------|------|--------------------------------------------------------------------------------------------------------------------------------------------------------------------------------------------------------------------------------------------------------------|--------------|-------------------------------------------------|-------------|----------------------------|----------------------------|-------------------------------------------|------------------------------------------|----------------|-------------------------------|------------------------------------------------------------------------------------------|
| 23      | Rosenthal et al | 2012 | Impact of a multidimensional infection control strategy on central line-associated bloodstream infection rates in pediatric intensive care units of five developing countries: findings of the International Nosocomial Infection Control Consortium (INICC) | Before-After | Colombia, India, Mexico, Philippines and Turkey | Urban       | Pediatric patients in ICUs | Pediatric patients in ICU  | All eligible patients during study period | 1,986 patients<br>9 PICUs in 9 hospitals | 87 months      | Secondary/Tertiary - hospital | INICC multidimensional infection control program including hand hygiene and disinfection |

| Study # | Author          | Year | Title                                                                                                                                                                                                                                                    | Study design | Country                                                                                                                                  | Urban/Rural | Study population      | Population characteristics                         | Method of participant selection                  | Sample size                 | Study duration | Type of facility              | Intervention                                                                                |
|---------|-----------------|------|----------------------------------------------------------------------------------------------------------------------------------------------------------------------------------------------------------------------------------------------------------|--------------|------------------------------------------------------------------------------------------------------------------------------------------|-------------|-----------------------|----------------------------------------------------|--------------------------------------------------|-----------------------------|----------------|-------------------------------|---------------------------------------------------------------------------------------------|
| 24      | Rosenthal et al | 2012 | Impact of a multidimensional infection control strategy on catheter-associated urinary tract infection rates in the adult intensive care units of 15 developing countries: findings of the International Nosocomial Infection Control Consortium (INICC) | Before-After | Argentina, Brazil, China, Colombia, Costa Rica, Cuba, India, Lebanon, Macedonia, Mexico, Morocco, Panama, Peru, Philippines, and Turkey. | Urban       | Adult patients in ICU | Adult patients in ICU with a urinary catheter (UC) | All eligible patients in ICU during study period | 56,429 patients<br>57 AICUs | 131 months     | Secondary/Tertiary - hospital | "INICC multidimensional infection control program including hand hygiene and disinfection " |

| Study # | Author                      | Year | Title                                                                                                          | Study design | Country | Urban/Rural | Study population    | Population characteristics | Method of participant selection | Sample size   | Study duration | Type of facility    | Intervention                                      |
|---------|-----------------------------|------|----------------------------------------------------------------------------------------------------------------|--------------|---------|-------------|---------------------|----------------------------|---------------------------------|---------------|----------------|---------------------|---------------------------------------------------|
| 25      | Von Dolinger de Brito et al | 2007 | Effect of neonatal intensive care unit environment on the incidence of hospital-acquired infection in neonates | Before-After | Brazil  | Urban       | Neonates in the ICU | N/R                        | N/R                             | 1811 neonates | 54 months      | Tertiary - hospital | Refurbishment of wards - improved sink:cot ratios |

| Study # | Author     | Year | Title                                                                                                            | Study design | Country | Urban/Rural | Study population    | Population characteristics                                                                                                                      | Method of participant selection                | Sample size  | Study duration | Type of facility    | Intervention                                                               |
|---------|------------|------|------------------------------------------------------------------------------------------------------------------|--------------|---------|-------------|---------------------|-------------------------------------------------------------------------------------------------------------------------------------------------|------------------------------------------------|--------------|----------------|---------------------|----------------------------------------------------------------------------|
| 26      | Zhou et al | 2015 | Successful reduction in central line-associated bloodstream infections in a Chinese neonatal intensive care unit | Before-After | China   | Urban       | Neonates in the ICU | All newborn patients with central line in dwelling for >48 hours and who had been hospitalized in the NICU for >=5 days during the study period | All eligible newborns in NICU at time of study | 171 newborns | 36 months      | Tertiary - hospital | infection prevention bundle - including hand hygiene and sterile practices |



| Study # | Author     | Year | Title                                                                                                                          | Study design | Country | Urban/Rural | Study population | Population characteristics                                                                                                                         | Method of participant selection                | Sample size          | Study duration | Type of facility    | Intervention                                                                                               |
|---------|------------|------|--------------------------------------------------------------------------------------------------------------------------------|--------------|---------|-------------|------------------|----------------------------------------------------------------------------------------------------------------------------------------------------|------------------------------------------------|----------------------|----------------|---------------------|------------------------------------------------------------------------------------------------------------|
| 27      | Zhou et al | 2013 | Efficacy of an infection control program in reducing ventilator-associated pneumonia in a Chinese neonatal intensive care unit | Before-After | China   | Urban       | Neonates in ICU  | All neonates who received mechanical ventilation for at least 48 hours and were hospitalized in the NICU for >5 days during 3 epochs were included | All eligible neonates in NICU at time of study | 491 neonate patients | 36 months      | Tertiary - hospital | Bundle of comprehensive preventive measures against VAP - including hand hygiene and disinfection training |

| Study # | Author          | Year | Description of the intervention                                                                                                                                                                                                                                                                                                                                                                                                                                                                                                                                               | WASH only/Combined | WASH intervention description                                                                                    | Length of the intervention | Length of post-intervention follow up | Definition of HCAI used                                                                                                                                                                                                                                                                                                                                                                                                                                                                                                                                                                                                                                                                                                                                                                                                                  |
|---------|-----------------|------|-------------------------------------------------------------------------------------------------------------------------------------------------------------------------------------------------------------------------------------------------------------------------------------------------------------------------------------------------------------------------------------------------------------------------------------------------------------------------------------------------------------------------------------------------------------------------------|--------------------|------------------------------------------------------------------------------------------------------------------|----------------------------|---------------------------------------|------------------------------------------------------------------------------------------------------------------------------------------------------------------------------------------------------------------------------------------------------------------------------------------------------------------------------------------------------------------------------------------------------------------------------------------------------------------------------------------------------------------------------------------------------------------------------------------------------------------------------------------------------------------------------------------------------------------------------------------------------------------------------------------------------------------------------------------|
| 1       | Abramczyk et al | 2011 | Didactic lectures, totaling 6 hours, were given to physicians, fellows and nursing staff of the unit using a slide show. The most important messages were: (I) catheters should be inserted using maximal barrier recommendations; (II) all inserted catheters should be removed as soon as possible; (III) hub connection disinfection with 70% alcohol before and after manipulation; (IV) site insertion CVC should be protected with impermeable plastic during bath; (V) fundamental cooperation of all unit members. No preferential site of insertion was recommended. | Combined           | Educational messages given - hub connection should be disinfected with 70% alcohol before and after manipulation | 2 months                   | 7 months                              | <p>CVC-AI were defined according to the CDC criteria of 1988</p> <p>Exit site infections were defined as erythema, tenderness, induration or purulence affecting 2 cm of the skin at the exit site of the catheter.</p> <p>Primary bloodstream infections were defined as bacteraemia (or fungaemia), for which there was no documented distal source, and included infections resulting from insertion of a central intravenous line. The infection was categorized either as microbiologically documented or as clinical sepsis.</p> <p>Infections were regarded as ICU acquired infections if they occurred during PICU stay or within 48 hours of discharge from the unit.</p> <p>The presence of bacteremia was defined as the isolation of a pathogen from a blood culture of a patient with symptoms suggestive of infection.</p> |

| Study # | Author           | Year | Description of the intervention                                                                      | WASH only/Combined | WASH intervention description                                                                                                                                                                                                                                                                                                                                                                             | Length of the intervention | Length of post-intervention follow up | Definition of HCAI used                                            |
|---------|------------------|------|------------------------------------------------------------------------------------------------------|--------------------|-----------------------------------------------------------------------------------------------------------------------------------------------------------------------------------------------------------------------------------------------------------------------------------------------------------------------------------------------------------------------------------------------------------|----------------------------|---------------------------------------|--------------------------------------------------------------------|
| 2       | Allegranzi et al | 2018 | Provision of antiseptic soap to patients for bathing and educational intervention for hospital staff | Combined           | <p>Provision of antiseptic soap to patients for bathing; optimise patient skin preparation, including local production of alcohol-based and chlorhexidine-based skin disinfection product; optimise surgical hand preparation, including local production of alcohol-based hand rub product and appropriate rubbing technique.</p> <p>Educational intervention on these techniques for hospital staff</p> | Ongoing                    | 7-12 months                           | Surgical site infection (SSI) is defined according to the CDC-NHSN |

| Study # | Author    | Year | Description of the intervention                                                                                                                          | WASH only/Combined | WASH intervention description                                                                                                                                                                                                                                                                                                         | Length of the intervention                                                                                                                                 | Length of post-intervention follow up | Definition of HCAI used                                                                                                                                                                                                            |
|---------|-----------|------|----------------------------------------------------------------------------------------------------------------------------------------------------------|--------------------|---------------------------------------------------------------------------------------------------------------------------------------------------------------------------------------------------------------------------------------------------------------------------------------------------------------------------------------|------------------------------------------------------------------------------------------------------------------------------------------------------------|---------------------------------------|------------------------------------------------------------------------------------------------------------------------------------------------------------------------------------------------------------------------------------|
| 3       | Alp et al | 2014 | Audits and feedback introduced 2009,<br><br>2009- increased hand basins and alcohol-based hand rub availability<br><br>2011 - bundle strategy introduced | Combined           | Audits and feedback introduced 2009,<br><br>2009- increased hand basins and alcohol-based hand rub availability<br><br>2011 - bundle strategy introduced (WASH components = distribution of chlorhexidine-containing soap, hand hygiene compliance audits, staff compliance feedback and daily chlorhexidine bathing of ICU patients) | Unclear:<br><br>Audits and feedback - 2009 -2012 (3 years)<br><br>Hand basins and alcohol rub - 2009-2012 = 3 years<br><br>Bundle introduced 2011 = 1 year | 0 months                              | Text refers to:<br>Horan TC, Andrus M, Dudeck MA. CDC/NHSN surveillance definition of health care associated infection and criteria for specific types of infections in the acute care setting. Am J Infect Control 2008;36:309-32 |

| Study # | Author               | Year | Description of the intervention                                                                                                                                                                                                                                                                                                                                                          | WASH only/Combined | WASH intervention description                                                                                                                                                                                                                                                                                                                                                                                                                        | Length of the intervention                      | Length of post-intervention follow up | Definition of HCAI used                                                   |
|---------|----------------------|------|------------------------------------------------------------------------------------------------------------------------------------------------------------------------------------------------------------------------------------------------------------------------------------------------------------------------------------------------------------------------------------------|--------------------|------------------------------------------------------------------------------------------------------------------------------------------------------------------------------------------------------------------------------------------------------------------------------------------------------------------------------------------------------------------------------------------------------------------------------------------------------|-------------------------------------------------|---------------------------------------|---------------------------------------------------------------------------|
| 4       | Alvarez-Moreno et al | 2016 | The INICC multidimensional approach and the ISOS, which included a bundle of 1) infection prevention practice interventions - guidelines (handwashing, sterilizing, etc.), education (on the guidelines including hand hygiene and sterilizing), outcome surveillance, process surveillance, feedback on CLABSI rates and consequences, and performance feedback of process surveillance | Combined           | The INICC multidimensional approach and the ISOS, which included a bundle of 1) infection prevention practice interventions - guidelines (handwashing, sterilizing (use a chlorhexidine-based antiseptic for skin preparation), etc.), education (on the guidelines including hand hygiene and sterilizing), outcome surveillance, process surveillance, feedback on CLABSI rates and consequences, and performance feedback of process surveillance | Varies across hospitals<br>7 months - 19 months | N/R                                   | Applied CDC-NHSN definitions for CLABSI published by the CDC-NSHN in 1991 |

| Study # | Author              | Year | Description of the intervention                                                                                                                                                                                                                                                                                                                                                                                                                                                                                                                                           | WASH only/Combined | WASH intervention description                                                                                                                                                                                   | Length of the intervention | Length of post-intervention follow up | Definition of HCAI used                                                                                                                                                                                                                                                                                                                                                                                                                                                                                                                                                                                                                                                                                                                                                                                                                                       |
|---------|---------------------|------|---------------------------------------------------------------------------------------------------------------------------------------------------------------------------------------------------------------------------------------------------------------------------------------------------------------------------------------------------------------------------------------------------------------------------------------------------------------------------------------------------------------------------------------------------------------------------|--------------------|-----------------------------------------------------------------------------------------------------------------------------------------------------------------------------------------------------------------|----------------------------|---------------------------------------|---------------------------------------------------------------------------------------------------------------------------------------------------------------------------------------------------------------------------------------------------------------------------------------------------------------------------------------------------------------------------------------------------------------------------------------------------------------------------------------------------------------------------------------------------------------------------------------------------------------------------------------------------------------------------------------------------------------------------------------------------------------------------------------------------------------------------------------------------------------|
| 5       | Apisarntharak et al | 2014 | In P2 (intervention period), all P1 (baseline period) interventions were continued, but bleach was used to clean environmental surfaces (e.g., bed rails, sinks, overbed tables, infusion pumps, surrounding counter tops) twice daily, and advanced source control was introduced. Advanced source control consisted of bathing patients once daily with 2% chlorhexidine in aqueous solution and performing oral care 4 times daily with 2% chlorhexidine. All P2 interventions were continued during P3, except an appropriate detergent-disinfectant replaced bleach. | Combined           | Hand and environmental cleaning with disinfectant, bathing patients with chlorhexidine, and performing oral cleaning with chlorhexidine. Hand hygiene promotion and monthly feedback on hand hygiene compliance | 5.5 months                 | 12.5 months                           | <p>MDR A baumannii was defined as an A baumannii isolate that was resistant to any 3 of 5 classes of systemic antibiotics (cephalosporins, aztreonam, carbapenems, aminoglycosides, fluoroquinolones), whereas XDR A baumannii was defined as an A baumannii isolate that was resistant to all currently available systemic antibiotics (ie, cephalosporins, aztreonam, carbapenems, aminoglycosides, fluoroquinolones, and sulbactam), except polymyxin B or tigecycline.</p> <p>Nosocomial infections were defined using Centers for Disease Control and Prevention criteria</p> <p>MICU acquisition of an XDR A baumannii surveillance isolate was defined as detection of this microorganism by active surveillance culture &gt;48 hours after MICU admission, following a negative active surveillance culture result at the time of MICU admission.</p> |

| Study # | Author                | Year | Description of the intervention                                                                                                                                                                                                                                                                                                                                                                                                                                                                                                                                                                                                                                                                                                                                                                                                   | WASH only/Combined | WASH intervention description                                                                                                                                                     | Length of the intervention                                                                                | Length of post-intervention follow up                                           | Definition of HCAI used                                                                                                               |
|---------|-----------------------|------|-----------------------------------------------------------------------------------------------------------------------------------------------------------------------------------------------------------------------------------------------------------------------------------------------------------------------------------------------------------------------------------------------------------------------------------------------------------------------------------------------------------------------------------------------------------------------------------------------------------------------------------------------------------------------------------------------------------------------------------------------------------------------------------------------------------------------------------|--------------------|-----------------------------------------------------------------------------------------------------------------------------------------------------------------------------------|-----------------------------------------------------------------------------------------------------------|---------------------------------------------------------------------------------|---------------------------------------------------------------------------------------------------------------------------------------|
| 6       | Apisarnthanarak et al | 2010 | <p>Period 1 = baseline<br/> Period 2 , alcohol- based hand rub dispensers installed and the CA-BSI prevention bundle was implemented. Components of CA-BSI bundle included (1) hospital-wide HCW education on proper hand hygiene, (2) education of physicians on the use of maximum sterile barrier precautions during CVC insertion, (3) use of a chlorhexidine based skin preparation, (4) optimization of CVC insertion practices, (5) daily review of the need for CVC in each patient.</p> <p>The educational component was for medical staff and was repeated every 4 months.</p> <p>During period 3 an intensified hand hygiene intervention was introduced. This intervention included similar but continuous education on hand hygiene and the importance of complying with the CA-BSI bundle for all involved HCWs</p> | Combined           | Provision of alcohol-based hand rub dispensers, hand hygiene education, education on using sterile barrier precautions during CVC insertion, skin preparation with chlorhexidine. | 12 months (CABSI bundle)<br>Followed by 12 months CABSI bundle with intensified hand hygiene intervention | Measures taken at 12 months and 24 months - intervention implemented throughout | The definition of CA-BSI definition used in this study was derived from Centers for Disease Control and Prevention (CDC) definitions. |

| Study # | Author     | Year | Description of the intervention                                                                                                                                                                                                                                                                                                                                                                                                                                                                                                                                                                                                                                                                                                                                                               | WASH only/Combined | WASH intervention description                                                                                                                     | Length of the intervention | Length of post-intervention follow up  | Definition of HCAI used |
|---------|------------|------|-----------------------------------------------------------------------------------------------------------------------------------------------------------------------------------------------------------------------------------------------------------------------------------------------------------------------------------------------------------------------------------------------------------------------------------------------------------------------------------------------------------------------------------------------------------------------------------------------------------------------------------------------------------------------------------------------------------------------------------------------------------------------------------------------|--------------------|---------------------------------------------------------------------------------------------------------------------------------------------------|----------------------------|----------------------------------------|-------------------------|
| 7       | Azab et al | 2015 | <p>Routine infection control (hand hygiene, sterilization of equipment)</p> <p>Bundle included:</p> <ul style="list-style-type: none"> <li>- Head-of-bed elevation 300-450.</li> <li>- Re-enforcement of hand hygiene practice.</li> <li>- Sterile suction and handling of respiratory equipment.</li> <li>- Intubation, re-intubation and endotracheal tube (ETT) suction as strictly indicated by unit protocol.</li> <li>- Change ventilator circuit if visibly soiled or mechanically malfunctioning (document)</li> <li>- Proper timed mouth care with normal saline and suction of oropharyngeal secretion.</li> <li>- Daily evaluation for readiness for extubation to nasal continuous airway pressure (NCPAP) at morning round, and sedation vacation for sedated patient</li> </ul> | Combined           | <p>Bundle - WASH components include:</p> <p>Reinforcing hand hygiene of medical staff, sterilization of equipment, mouth hygiene of patients.</p> | 6 months                   | Collected immediately after - 0 months | VAP                     |



| Study # | Author          | Year | Description of the intervention                                                                                                                                                                                                              | WASH only/Combined | WASH intervention description                                                                                                                                                                                             | Length of the intervention | Length of post-intervention follow up | Definition of HCAI used                                                                                                                                                                                                                                                                                                                                                                                                                                                                                                                                                                                                                                                                                                                                                                                                                  |
|---------|-----------------|------|----------------------------------------------------------------------------------------------------------------------------------------------------------------------------------------------------------------------------------------------|--------------------|---------------------------------------------------------------------------------------------------------------------------------------------------------------------------------------------------------------------------|----------------------------|---------------------------------------|------------------------------------------------------------------------------------------------------------------------------------------------------------------------------------------------------------------------------------------------------------------------------------------------------------------------------------------------------------------------------------------------------------------------------------------------------------------------------------------------------------------------------------------------------------------------------------------------------------------------------------------------------------------------------------------------------------------------------------------------------------------------------------------------------------------------------------------|
| 8       | Guanche-Garcell | 2013 | Multidimensional approach included the following measures: a bundle of infection control interventions, education, outcome surveillance, process surveillance, feedback of VAP rates and performance feedback of infection control practices | Combined           | Bundle included (among other measures):<br>Performance of comprehensive regular oral care with an antiseptic solution, performance of direct observation of hand hygiene compliance, adherence to hand-hygiene guidelines | 47 months                  | 0 months                              | <p>The INICC Surveillance Program applies the definitions for device associated infections (DAIs) developed by the U.S. Centers for Disease Control and Prevention (CDC) for the National Nosocomial Infection Surveillance System (NNIS)/National Health Safety Network (NHSN) program</p> <p>CDC NHSN definitions for VAP were applied whereby VAP is diagnosed in a mechanically ventilated patient with a chest radiograph showing new or progressive infiltrates, consolidation, cavitation, or pleural effusion. The patient also must meet at least one of the following criteria: new onset of purulent sputum or change in character of sputum; organism cultured from the blood; or isolation of an etiologic agent from a specimen obtained by tracheal aspirate, bronchial brushing or bronchoalveolar lavage, or biopsy</p> |

| Study # | Author     | Year | Description of the intervention                                                                                                                                                                                                                                                    | WASH only/Combined | WASH intervention description                                                                    | Length of the intervention                                                                                                                                               | Length of post-intervention follow up | Definition of HCAI used                                                                                      |
|---------|------------|------|------------------------------------------------------------------------------------------------------------------------------------------------------------------------------------------------------------------------------------------------------------------------------------|--------------------|--------------------------------------------------------------------------------------------------|--------------------------------------------------------------------------------------------------------------------------------------------------------------------------|---------------------------------------|--------------------------------------------------------------------------------------------------------------|
| 9       | Jagi et al | 2013 | The International Nosocomial Infection Control Consortium (INICC) approach was implemented, which included a bundle of infection control interventions, education, outcome surveillance, process surveillance, feedback on CLABSI rates and consequences, and performance feedback | Combined           | Bundle included hand hygiene, chlorhexidine for skin preparation, disinfecting medical equipment | ICUs had undergone different lengths of intervention. The average length of the intervention period was 17.54 months (standard deviation 8.9 months, range 5–36 months). | 36 months                             | Definition from CDC/NHSN (US Centers for Disease Control and Prevention/ National Healthcare Safety Network) |

| Study # | Author       | Year | Description of the intervention                                                                                                                                                                                                                                                                                                                                                                                                                                                                                                                              | WASH only/Combined | WASH intervention description                                                                  | Length of the intervention | Length of post-intervention follow up | Definition of HCAI used |
|---------|--------------|------|--------------------------------------------------------------------------------------------------------------------------------------------------------------------------------------------------------------------------------------------------------------------------------------------------------------------------------------------------------------------------------------------------------------------------------------------------------------------------------------------------------------------------------------------------------------|--------------------|------------------------------------------------------------------------------------------------|----------------------------|---------------------------------------|-------------------------|
| 10      | Kurlat et al | 1998 | The intervention strategy was a three-step programme. Step 1 included surveillance of NICU practices to establish possible causes for high endemic infection rates. Step 2 was dedicated to the development of guidelines for those practices that were judged to be responsible for high infection rates. Guidelines for handwashing, infant handling and use of gloves, care of intravenous lines, including dressing and handling of three-way-stopcock, and suction of the endotracheal tube were established. Step 3 - training personnel in guidelines | Combined           | Guidelines created and staff trained in guidelines which include handwashing and sterilization | 12 months                  | 0 months                              | N/R                     |

| Study # | Author              | Year | Description of the intervention                                                                                                                                                           | WASH only/Combined | WASH intervention description                                                                                                                               | Length of the intervention                                                                 | Length of post-intervention follow up | Definition of HCAI used                                                                               |
|---------|---------------------|------|-------------------------------------------------------------------------------------------------------------------------------------------------------------------------------------------|--------------------|-------------------------------------------------------------------------------------------------------------------------------------------------------------|--------------------------------------------------------------------------------------------|---------------------------------------|-------------------------------------------------------------------------------------------------------|
| 11      | Leblebicioglu et al | 2013 | a multidimensional approach that included bundle of infection control interventions, education, surveillance and feedback on CAUTI rates, process surveillance, and performance feedback. | Combined           | HH before insertion and manipulation of the urinary catheter, disinfection of skin and equipment, monitoring/observation of hand hygiene compliance in HCWs | The average length of intervention was 22.4 months, standard deviation 17.2 (range, 4-60). | 0 months                              | Definitions of the Centers for Disease Control and Prevention/National Healthcare Safety Network used |

| Study # | Author              | Year | Description of the intervention                                                                                                                                                                      | WASH only/Combined | WASH intervention description                                                      | Length of the intervention                                                                 | Length of post-intervention follow up | Definition of HCAI used                                            |
|---------|---------------------|------|------------------------------------------------------------------------------------------------------------------------------------------------------------------------------------------------------|--------------------|------------------------------------------------------------------------------------|--------------------------------------------------------------------------------------------|---------------------------------------|--------------------------------------------------------------------|
| 12      | Leblebicioglu et al | 2013 | 1- bundle of infection control interventions, 2- education, 3- outcome surveillance, 4- process surveillance, 5- feedback of CLAB rates, and 6- performance feedback on infection control practices. | Combined           | Hand hygiene, disinfection of skin and equipment, daily bathing with chlorhexidine | The average length of the intervention period was 15.6 months $\pm$ SD 9.2 (range 4 – 36). | 0 months                              | Definitions of the CDC/NHSN and INICC surveillance methods applied |

| Study # | Author              | Year | Description of the intervention                                                                                                                                                                     | WASH only/Combined | WASH intervention description                                                                                      | Length of the intervention                                                                 | Length of post-intervention follow up | Definition of HCAI used                                                                                                                                                                                                                                                                                                                                                                                                                                                                                                  |
|---------|---------------------|------|-----------------------------------------------------------------------------------------------------------------------------------------------------------------------------------------------------|--------------------|--------------------------------------------------------------------------------------------------------------------|--------------------------------------------------------------------------------------------|---------------------------------------|--------------------------------------------------------------------------------------------------------------------------------------------------------------------------------------------------------------------------------------------------------------------------------------------------------------------------------------------------------------------------------------------------------------------------------------------------------------------------------------------------------------------------|
| 13      | Leblebicioglu et al | 2013 | 1- Bundle of infection control interventions 2- education, 3- outcome surveillance, 4- process surveillance, 5- feedback of CLAB rates, and 6- performance feedback on infection control practices. | Combined           | Hand hygiene, disinfection of skin and equipment, oral care with antiseptic solution, observation of HH compliance | The average length of the intervention period was 28.64 months $\pm$ SD 20.27 (range 6–72) | 0 months                              | CDC NHSN definitions for VAP applied. VAP is diagnosed in a mechanically ventilated patient with a chest radiograph that shows new or progressive infiltrates, consolidation, cavitation, or pleural effusion. The patient also must meet at least one of the following criteria: new onset of purulent sputum or change in character of sputum, organism cultured from blood, or isolation of an etiologic agent from a specimen obtained by tracheal aspirate, bronchial brushing or bronchoalveolar lavage, or biopsy |

| Study # | Author     | Year | Description of the intervention                                                                                            | WASH only/Combined | WASH intervention description                                                                                      | Length of the intervention | Length of post-intervention follow up | Definition of HCAI used                                              |
|---------|------------|------|----------------------------------------------------------------------------------------------------------------------------|--------------------|--------------------------------------------------------------------------------------------------------------------|----------------------------|---------------------------------------|----------------------------------------------------------------------|
| 14      | Lenz et al | 2018 | Monthly workshops were carried out on hand hygiene and the implementation of the five moments at the point of patient care | Combined           | Workshops were carried out on hand hygiene and the implementation of the five moments at the point of patient care | 10 months                  | 0 months                              | Definition from the Centers for Disease Control and Prevention (CDC) |

| Study # | Author      | Year | Description of the intervention                                                                                                                                                                                                                                                                                                                                                                                                                                                                                                                                                               | WASH only/Combined | WASH intervention description                                                 | Length of the intervention | Length of post-intervention follow up | Definition of HCAI used                                                                                                                                                                      |
|---------|-------------|------|-----------------------------------------------------------------------------------------------------------------------------------------------------------------------------------------------------------------------------------------------------------------------------------------------------------------------------------------------------------------------------------------------------------------------------------------------------------------------------------------------------------------------------------------------------------------------------------------------|--------------------|-------------------------------------------------------------------------------|----------------------------|---------------------------------------|----------------------------------------------------------------------------------------------------------------------------------------------------------------------------------------------|
| 15      | Marra et al | 2010 | <p>Bundle included creation of a central catheter insertion cart; hand hygiene; maximal barrier precautions for insertion; chlorhexidine skin antiseptis; optimal catheter site selection, with avoidance of the femoral vein for central venous access in adult patients; daily review of line necessity with prompt removal of unnecessary lines)</p> <p>The ICU and SDU nurses intervened in this process at the same time that performance monitoring was occurring at the bedside if non-compliance with an element of the bundle was detected (eg, hand hygiene was not performed).</p> | Combined           | Hand hygiene, disinfection of skin and equipment, monitoring of HH compliance | 24 months                  | 0 months                              | <p>CDC definition</p> <p>A CLABSI was considered to be related to a specific unit if detected at least 48 hours after admission to, or less than 48 hours after discharge from, the unit</p> |



| Study # | Author      | Year | Description of the intervention                                                                                                                                                               | WASH only/Combined | WASH intervention description                                                           | Length of the intervention                                              | Length of post-intervention follow up | Definition of HCAI used                                                                                                                                                                                                                                                                                                                                                                                                                                                             |
|---------|-------------|------|-----------------------------------------------------------------------------------------------------------------------------------------------------------------------------------------------|--------------------|-----------------------------------------------------------------------------------------|-------------------------------------------------------------------------|---------------------------------------|-------------------------------------------------------------------------------------------------------------------------------------------------------------------------------------------------------------------------------------------------------------------------------------------------------------------------------------------------------------------------------------------------------------------------------------------------------------------------------------|
| 16      | Mehta et al | 2013 | International Nosocomial Infection Control Consortium's (INICC) approach --> bundle of interventions, education, outcome and process surveillance, and feedback of VAP rates and performance. | Combined           | Bundle which included adherence to HH guidelines and oral care with antiseptic solution | Average duration ( $\pm$ S.D.) of 23-33 $\pm$ 16-86 (range 6-76) months | 0 months                              | VAP was diagnosed in a mechanically ventilated patient when a chest radiograph showed new or progressive infiltrates, consolidation, cavitation, or pleural effusion. The patient also had to meet at least one of the following criteria: new onset of purulent sputum or change in character of sputum, organism cultured from blood, or isolation of an etiological agent from a specimen obtained by tracheal aspirate, bronchial brushing or bronchoalveolar lavage, or biopsy |

| Study # | Author      | Year | Description of the intervention                                                                                                                                                                                                                      | WASH only/Combined | WASH intervention description                  | Length of the intervention | Length of post-intervention follow up | Definition of HCAI used                                                                                                                                                                      |
|---------|-------------|------|------------------------------------------------------------------------------------------------------------------------------------------------------------------------------------------------------------------------------------------------------|--------------------|------------------------------------------------|----------------------------|---------------------------------------|----------------------------------------------------------------------------------------------------------------------------------------------------------------------------------------------|
| 17      | Murni et al | 2015 | <p>The multifaceted intervention consisted of a hand hygiene campaign, antibiotic stewardship and other elementary infection control practices.</p> <p>The intervention included educational seminars, reminders, audit and performance feedback</p> | Combined           | Hand hygiene education and reminder checklists | 3 months                   | 12 months                             | The definitions of HAI were based on the US Centers for Disease Control and Prevention (CDC), National Healthcare Safety Network and the National Nosocomial Infections Surveillance system. |

| Study # | Author      | Year | Description of the intervention                                                                                                                                                                                                                   | WASH only/Combined | WASH intervention description                               | Length of the intervention                                                                 | Length of post-intervention follow up | Definition of HCAI used                                                                                                                                                                                                                                                                                                                                                                                                                                                                                                                                                                                                                                                                                                                                                                                                                                                                                                |
|---------|-------------|------|---------------------------------------------------------------------------------------------------------------------------------------------------------------------------------------------------------------------------------------------------|--------------------|-------------------------------------------------------------|--------------------------------------------------------------------------------------------|---------------------------------------|------------------------------------------------------------------------------------------------------------------------------------------------------------------------------------------------------------------------------------------------------------------------------------------------------------------------------------------------------------------------------------------------------------------------------------------------------------------------------------------------------------------------------------------------------------------------------------------------------------------------------------------------------------------------------------------------------------------------------------------------------------------------------------------------------------------------------------------------------------------------------------------------------------------------|
| 18      | Navoa et al | 2013 | INICC programme - a multidimensional approach that included: (1) a bundle of infection control interventions, (2) education, (3) surveillance of CAUTI rates, (4) feedback on CAUTI rates, (5) process surveillance and (6) performance feedback. | Combined           | Hand hygiene education, sterilization of skin and equipment | The average length of the intervention period was 27.9 months $\pm$ 18.2 (SD; range 10—61) | 0 months                              | <p>Definition for healthcare-associated infections(HAIs) developed by the US Centers for Disease Control and Prevention (CDC) for the National Healthcare Safety Network (NHSN) program</p> <p>Definition of CAUTI: CAUTI was diagnosed if the patient met one of two criteria. The first criterion was satisfied when a patient with a urinary catheter had one or more of the following symptoms with no other recognized cause: fever (temperature <math>\geq</math>38°C), urgency, or suprapubic tenderness. The urine culture was positive for 105 colony-forming units (CFU) per mL or more, with no more than two microorganisms isolated. The second criterion was satisfied when a patient with a urinary catheter had at least two of the following criteria with no other recognized cause: positive dipstick analysis for leukocyte esterase or nitrate and pyuria (<math>\geq</math>10 leukocytes/mL)</p> |

| Study # | Author       | Year | Description of the intervention                                                                                    | WASH only/Combined | WASH intervention description                                        | Length of the intervention | Length of post-intervention follow up | Definition of HCAI used                                                                                                                                                                                                                                                                                                                                                                                 |
|---------|--------------|------|--------------------------------------------------------------------------------------------------------------------|--------------------|----------------------------------------------------------------------|----------------------------|---------------------------------------|---------------------------------------------------------------------------------------------------------------------------------------------------------------------------------------------------------------------------------------------------------------------------------------------------------------------------------------------------------------------------------------------------------|
| 19      | Ng Y.Y et al | 2015 | All pediatric Interns trained on infection control - hand hygiene, disposal of fluids, gloves, sterilization, etc. | WASH only          | Training on hand hygiene and aseptic technique for pediatric interns | 2 months                   | 0 months                              | <p>ICU-associated infection was defined as an infection that was not present or incubating during the patient's admission to the ICU, but became apparent during the ICU stay or within 48 hours after transfer from the ICU</p> <p>A BSI was considered to have been acquired in the PICU if the positive blood culture was obtained more than 48 hours after the patient's admission to the unit.</p> |

| Study # | Author       | Year | Description of the intervention                 | WASH only/Combined | WASH intervention description                    | Length of the intervention | Length of post-intervention follow up | Definition of HCAI used                                                                                                                                                                                                                                                            |
|---------|--------------|------|-------------------------------------------------|--------------------|--------------------------------------------------|----------------------------|---------------------------------------|------------------------------------------------------------------------------------------------------------------------------------------------------------------------------------------------------------------------------------------------------------------------------------|
| 20      | Ogwang et al | 2013 | infection control programme - little info given | Combined           | Hand hygiene and skin and equipment disinfection | 12 months                  | 0 months                              | <p>The HAI definitions used were based on WHO simplified criteria for surveillance of nosocomial infections but only clinical criteria were used</p> <p>HAI was defined as an infection that was not present at hospital admission and occurred more than 48 h after admission</p> |

| Study # | Author          | Year | Description of the intervention                                                                                                                                                                                                                                                                                                                                                                                                           | WASH only/Combined | WASH intervention description | Length of the intervention | Length of post-intervention follow up | Definition of HCAI used                                                                                                            |
|---------|-----------------|------|-------------------------------------------------------------------------------------------------------------------------------------------------------------------------------------------------------------------------------------------------------------------------------------------------------------------------------------------------------------------------------------------------------------------------------------------|--------------------|-------------------------------|----------------------------|---------------------------------------|------------------------------------------------------------------------------------------------------------------------------------|
| 21      | Rosenthal et al | 2006 | <p>One-hour educational sessions. Each 1-hour session was self-contained and emphasized the following: (1) epidemiology and pathogenesis of nosocomial pneumonia; (2) hand hygiene before and after patient contact; (3) proper handling of the respiratory secretions and suction catheters; and (4) percussion and postural drainage to stimulate coughing</p> <p>Feedback of VAP rates was provided to ICU HCWs on a monthly basis</p> | Combined           | Hand hygiene education        | 24 months                  | 0 months                              | Standard Centers for Disease Control and Prevention (CDC)/National Nosocomial Infection Surveillance (NNIS) system definition used |

| Study # | Author          | Year | Description of the intervention                                                                                                                                                                                                                                                                                                                                                                                                                                                              | WASH only/Combined | WASH intervention description                                  | Length of the intervention | Length of post-intervention follow up | Definition of HCAI used                                                        |
|---------|-----------------|------|----------------------------------------------------------------------------------------------------------------------------------------------------------------------------------------------------------------------------------------------------------------------------------------------------------------------------------------------------------------------------------------------------------------------------------------------------------------------------------------------|--------------------|----------------------------------------------------------------|----------------------------|---------------------------------------|--------------------------------------------------------------------------------|
| 22      | Rosenthal et al | 2005 | Interventions to improve hand hygiene compliance included monthly meetings at which visual displays of handwashing rates were presented. These were also posted monthly in the 2 ICUs. Focused education of all HCWs was provided. Educational classes were given in 1-hour group sessions for all shifts every day for 1 week. Each participant was given the infection control manual, and the APIC hand hygiene guideline was used as an educational tool to reinforce classroom teaching | WASH only          | Hand hygiene education, visual displays of hand hygiene rates. | 17 months                  | 0 months                              | Adapted standard definitions of the Centers for Disease Control and Prevention |

| Study # | Author          | Year | Description of the intervention                                                                                                                                                                                                                                                         | WASH only/Combined | WASH intervention description                    | Length of the intervention                                                                                   | Length of post-intervention follow up | Definition of HCAI used                                                                                                                                                                                                                                                                                                                                                                                                                                                                                                                                                                                                                                                                                                                                                                                                                                                                                                                                                                                                                                                                                                                                                                                                                                                                                                                                                                                                                                                                                                                                                  |
|---------|-----------------|------|-----------------------------------------------------------------------------------------------------------------------------------------------------------------------------------------------------------------------------------------------------------------------------------------|--------------------|--------------------------------------------------|--------------------------------------------------------------------------------------------------------------|---------------------------------------|--------------------------------------------------------------------------------------------------------------------------------------------------------------------------------------------------------------------------------------------------------------------------------------------------------------------------------------------------------------------------------------------------------------------------------------------------------------------------------------------------------------------------------------------------------------------------------------------------------------------------------------------------------------------------------------------------------------------------------------------------------------------------------------------------------------------------------------------------------------------------------------------------------------------------------------------------------------------------------------------------------------------------------------------------------------------------------------------------------------------------------------------------------------------------------------------------------------------------------------------------------------------------------------------------------------------------------------------------------------------------------------------------------------------------------------------------------------------------------------------------------------------------------------------------------------------------|
| 23      | Rosenthal et al | 2012 | The INICC multidimensional infection control strategy includes the following: (1) bundle of infection control interventions, (2) education, (3) outcome surveillance, (4) process surveillance, (5) feedback of CLAB rates, and (6) performance feedback of infection control practices | Combined           | Hand hygiene, disinfection of skin and equipment | The average length of the intervention period was 12.8 months $\pm$ standard deviation (SD) 8.9 (range 3–24) | 0 months                              | <p>Laboratory confirmed CLAB: A patient with a CL who has a recognized pathogen isolated from one or more percutaneous blood cultures after 48 h of catheterization; the pathogen cultured from blood is not related to an infection at another site; and a patient has one or more of the following signs or symptoms: fever (<math>\geq 38.0^\circ\text{C}</math>), chills, or hypotension. With skin commensals (diphtheroids, <i>Bacillus</i> spp., <i>Propionibacterium</i> spp., coagulase-negative staphylococci or micrococci), the organism has been recovered from two or more separate blood cultures</p> <p>Clinically confirmed CLAB: A patient with a CL who has at least one of the following clinical signs, with no other recognized cause: fever<br/> A patient with a central line who has at least one of the following clinical signs, with no other recognized cause: fever (<math>\geq 38.0^\circ\text{C}</math>), hypotension (systolic blood pressure <math>\leq 90</math> mmHg), or oliguria (<math>\leq 20</math> mL/h), but blood cultures were either not obtained or no organisms were recovered from blood cultures; there is no apparent infection at another site; and the physician instigates antimicrobial therapy, hypotension (systolic blood pressure <math>\leq 90</math> mmHg), or oliguria (<math>\leq 20</math> mL/h), but blood cultures were either not obtained or no organisms were recovered from blood cultures; there is no apparent infection at another site; and the physician instigates antimicrobial therapy</p> |



| Study # | Author          | Year | Description of the intervention                                                                                                                                                                                                                                                          | WASH only/Combined | WASH intervention description                                                                                  | Length of the intervention                                                                                      | Length of post-intervention follow up | Definition of HCAI used                                                                                                                                                                                                                                                                                                                                                                                                                                                                                                                                                                                                                                    |
|---------|-----------------|------|------------------------------------------------------------------------------------------------------------------------------------------------------------------------------------------------------------------------------------------------------------------------------------------|--------------------|----------------------------------------------------------------------------------------------------------------|-----------------------------------------------------------------------------------------------------------------|---------------------------------------|------------------------------------------------------------------------------------------------------------------------------------------------------------------------------------------------------------------------------------------------------------------------------------------------------------------------------------------------------------------------------------------------------------------------------------------------------------------------------------------------------------------------------------------------------------------------------------------------------------------------------------------------------------|
| 24      | Rosenthal et al | 2012 | The INICC multidimensional infection control strategy includes the following: (1) bundle of infection control interventions, (2) education, (3) outcome surveillance, (4) process surveillance, (5) feedback of CLAB rates, and (6) performance feedback of infection control practices" | Combined           | Hand hygiene, disinfection of skin and equipment, hand hygiene monitoring observations, HH compliance feedback | The average length of the intervention period was 22.9 months $\pm$ standard deviation (SD) 20.85 (range 4–107) | 0 months                              | For the diagnosis of CAUTI, the patient must meet one of two criteria. The first criterion is satisfied when a patient with a UC has one or more of the following symptoms, with no other recognized cause: fever (temperature $\geq 38$ oC), urgency, or suprapubic tenderness. The urine culture is positive for 105 colony-forming units (CFU) per mL or more, with no more than two microorganisms isolated. The second criterion is satisfied when a patient with a UC has at least two of the following criteria, with no other recognized cause: positive dipstick analysis for leukocyte esterase or nitrate and pyuria ( $\geq 10$ leukocytes/mL) |

| Study # | Author                      | Year | Description of the intervention                                                                                                                                                                                                                                                                                                                                                                                                                                                                                                                                                                                                                                                                                                                                                                                                                                                                                                                                                                                                                                                                                                                                                                                                                                                                                                                                                                                                              | WASH only/Combined | WASH intervention description                                                                               | Length of the intervention | Length of post-intervention follow up | Definition of HCAI used                                                                                                                                                                      |
|---------|-----------------------------|------|----------------------------------------------------------------------------------------------------------------------------------------------------------------------------------------------------------------------------------------------------------------------------------------------------------------------------------------------------------------------------------------------------------------------------------------------------------------------------------------------------------------------------------------------------------------------------------------------------------------------------------------------------------------------------------------------------------------------------------------------------------------------------------------------------------------------------------------------------------------------------------------------------------------------------------------------------------------------------------------------------------------------------------------------------------------------------------------------------------------------------------------------------------------------------------------------------------------------------------------------------------------------------------------------------------------------------------------------------------------------------------------------------------------------------------------------|--------------------|-------------------------------------------------------------------------------------------------------------|----------------------------|---------------------------------------|----------------------------------------------------------------------------------------------------------------------------------------------------------------------------------------------|
| 25      | Von Dolinger de Brito et al | 2007 | <p>From January to September 2003 the unit was refurbished and the design of the new facility was much more conducive to good infection control practices. Surveillance was performed over three different periods: (A) in the original facilities between January 2001 and December 2002; (B) in temporary accommodation from January to September 2003; (C) in the new unit between October 2003 and July 2005. The original (period A) and temporary (period B) units had smaller floor areas than the new (period C) unit with archaic ventilation systems, whereas the new unit had more space and central air conditioning. The average of admissions per month was highest (38 per month) in period B compared to 33 and 30 per month in periods A (<math>P = 0.00002</math>) and C (<math>P = 0.0002</math>) respectively. Though the number of nurses (<math>N = 5</math>) and cots (<math>N = 10</math>) remained the same throughout all periods, the ratio of NICU nurses to number of monthly admissions was lower in period B (<math>P = 0.001</math>).</p> <p>Sink:cot ratio was also lower in period B (0.1, <math>P &lt; 0.002</math>) compared to 0.2 in A and 0.4 in C (Table I). In the new unit, four sinks were installed at the entrance with paper towels, automated faucet and dispensers of 2.0% chlorhexidine.</p> <p>In addition, the new unit had an isolation side-room, with a sink and automatic faucets</p> | Combined           | Refurbishment including - sinks, automated taps, paper towels and anti-microbial (chlorhexidine) dispensers | unclear                    | unclear                               | Infections that manifested with suggestive clinical symptoms and/or positive cultures 48 h or more after birth were defined as nosocomial infections, according to the definitions from NNIS |

| Study # | Author     | Year | Description of the intervention                                                                                                                                                                                                                                                                                                                                                                                                                                                                                                                                      | WASH only/Combined | WASH intervention description                                                                                     | Length of the intervention | Length of post-intervention follow up | Definition of HCAI used                                                                                                                                                                                                                                            |
|---------|------------|------|----------------------------------------------------------------------------------------------------------------------------------------------------------------------------------------------------------------------------------------------------------------------------------------------------------------------------------------------------------------------------------------------------------------------------------------------------------------------------------------------------------------------------------------------------------------------|--------------------|-------------------------------------------------------------------------------------------------------------------|----------------------------|---------------------------------------|--------------------------------------------------------------------------------------------------------------------------------------------------------------------------------------------------------------------------------------------------------------------|
| 26      | Zhou et al | 2015 | <p>Medical and nursing staff asked to adhere to these measures:</p> <ol style="list-style-type: none"> <li>1) Enhance hand hygiene practices</li> <li>2) Establish dedicated PICC team and monitor group</li> <li>3) Use an all-inclusive central line (CL) cart and prepackaged kits</li> <li>4) Evaluate the CL daily and removal of nonessential CLs</li> <li>5) Provide education and simulation training: hand hygiene, barrier precautions (sterile gown and gloves, cap, mask, and a large sheet) during CL insertion, and CL care and maintenance</li> </ol> | Combined           | Hand hygiene education, easily accessible hand washing and hand disinfection facilities, using sterile techniques | 12 months                  | 12 months                             | The Centers for Disease Control's National Healthcare Safety Network (NHSN) definitions were used to define CLABSI. CLABSI was considered if the central line was in use at the time of or during the 48 hours preceding the development of bloodstream infection. |

| Study # | Author     | Year | Description of the intervention                                                                                                                                                                                                                                                                                                                                                                                                                                                                                                                                                                                                                                                                                                                                                                                                                                                                                                                                                                                                                                                | WASH only/Combined | WASH intervention description                                                                                                                              | Length of the intervention | Length of post-intervention follow up | Definition of HCAI used                                                                                                                                                                                                                                                                                                                                                                                                                                                            |
|---------|------------|------|--------------------------------------------------------------------------------------------------------------------------------------------------------------------------------------------------------------------------------------------------------------------------------------------------------------------------------------------------------------------------------------------------------------------------------------------------------------------------------------------------------------------------------------------------------------------------------------------------------------------------------------------------------------------------------------------------------------------------------------------------------------------------------------------------------------------------------------------------------------------------------------------------------------------------------------------------------------------------------------------------------------------------------------------------------------------------------|--------------------|------------------------------------------------------------------------------------------------------------------------------------------------------------|----------------------------|---------------------------------------|------------------------------------------------------------------------------------------------------------------------------------------------------------------------------------------------------------------------------------------------------------------------------------------------------------------------------------------------------------------------------------------------------------------------------------------------------------------------------------|
| 27      | Zhou et al | 2013 | <p>Phase 2 = Bundle included:</p> <ol style="list-style-type: none"> <li>1) New unit - improved ventilation and patients were allocated to specific areas based on their diagnosis and clinical course</li> <li>2) <u>Reinforcement of hand hygiene practices</u></li> <li>3) <u>Rational waste disposal</u>: Colored buckets were placed in the new ward. Black buckets for normal waste and yellow for potentially infectious or dangerous waste such as syringes, needles, and broken tubes</li> <li>4) Enhancement of patient isolation and <u>ventilator disinfection</u></li> <li>5) Periodic educational activities on VAP prevention, <u>including hand hygiene</u></li> <li>6) Shorten duration of mechanical ventilation</li> <li>7) Enhance the respiratory management of patients</li> <li>8) Rational use of antibiotics</li> </ol> <p>Phase 3 = All the above measures for VAP control were continued through this phase. Additionally, NICU staff members, including nursing staff, were empowered to monitor and impede any breaches in infection control.</p> | Combined           | Reinforcement of hand hygiene practices, rational waste disposal (separating normal and infectious waste), ventilator disinfection, hand hygiene education | 12 months                  | 0 months                              | Diagnosis of VAP was based on modified criteria from published literature and from US Centers for Disease Control and Prevention <sup>11,12</sup> and included infants who developed new and persistent radiographic evidence of focal infiltrates; had at least 3 clinical signs and symptoms, including temperature instability, wheezing, tachypnea, cough, abnormal heart rate, change in secretions, or an abnormal leukocyte count; received antibiotics for at least 7 days |

| Study # | Author          | Year | Primary outcome                                                                                                                      | Secondary outcomes | Additional outcomes | Laboratory-based measurement | Effect estimate                                                                                                                                                                                                                                                                                                                                                                                                                                                                                                                                                           | Process and implementation factors | Intervention uptake | Cost of intervention |
|---------|-----------------|------|--------------------------------------------------------------------------------------------------------------------------------------|--------------------|---------------------|------------------------------|---------------------------------------------------------------------------------------------------------------------------------------------------------------------------------------------------------------------------------------------------------------------------------------------------------------------------------------------------------------------------------------------------------------------------------------------------------------------------------------------------------------------------------------------------------------------------|------------------------------------|---------------------|----------------------|
| 1       | Abramczyk et al | 2011 | Incidence of CVC-associated infections (CVC-AI):<br>CVC-associated bloodstream infections (CVC-ABSI)<br>CVC-site insertion<br>CVC-AI | N/R                | N/R                 | Bacteria cultures            | The incidence density of catheter infections was 31.1 episodes per 1,000 venous central catheter-days before interventions and 16.5 episodes per 1,000 venous central catheter-days after interventions [RR 0.53 (95% CI 0.28-1.01)]. Corresponding rates for exit-site catheter infections were 8 and 2.5 episodes per 1,000 venous central catheter-days, respectively [0.32 (95% CI 0.07-1.49)], and the rates for bloodstream infections were 23.1 and 13.7 episodes per 1,000 venous central catheter-days, before and after intervention [0.61 (95% CI 0.32-1.14)]. | N/R                                | N/R                 | N/R                  |

| Study # | Author           | Year | Primary outcome                                                                                                       | Secondary outcomes                | Additional outcomes                                            | Laboratory-based measurement | Effect estimate                                                                                                                                                                                                                                                                                                                                                                                                                                                             | Process and implementation factors                                                                                                                                                                                                                                                                                                                                                                                                                                                                                                                                                                                                                                                                                                                                                                              | Intervention uptake | Cost of intervention |
|---------|------------------|------|-----------------------------------------------------------------------------------------------------------------------|-----------------------------------|----------------------------------------------------------------|------------------------------|-----------------------------------------------------------------------------------------------------------------------------------------------------------------------------------------------------------------------------------------------------------------------------------------------------------------------------------------------------------------------------------------------------------------------------------------------------------------------------|-----------------------------------------------------------------------------------------------------------------------------------------------------------------------------------------------------------------------------------------------------------------------------------------------------------------------------------------------------------------------------------------------------------------------------------------------------------------------------------------------------------------------------------------------------------------------------------------------------------------------------------------------------------------------------------------------------------------------------------------------------------------------------------------------------------------|---------------------|----------------------|
| 2       | Allegranzi et al | 2018 | SSI (first occurrence) - the cumulative incidence of SSI per 100 surgical operations within 30 days of the procedure. | Death within 30 days post surgery | Adherence to SSI prevention measures (prospectively collected) | N/R                          | <p>SSI cumulative incidence significantly decreased post intervention, from 8.0% (95% CI 6.8–9.5; n=129) to 3.8% (3.0–4.8; n=70; p&lt;0.0001), and this decrease persisted in the sustainability period (3.9%, 2.8–5.4; n=35)</p> <p>The likelihood of SSI during follow-up was significantly lower than pre-intervention (odds ratio [OR] 0.40, 95% CI 0.29–0.54; p&lt;0.0001), but the likelihood of death was not significantly reduced (0.72, 0.42–1.24; p=0.2360).</p> | <p>Implementation of the Surgical Unit-based Safety Programme intervention was done entirely by local teams. Staff from WHO and Johns Hopkins Armstrong Institute for Patient Safety and Quality formed a central coordinating team that provided technical expertise and mentorship on project management and data collection. This central coordination was delivered at a distance through monthly webinars, e-mails, and telephone discussions, until the end of follow-up. During the study, each site received one support visit from the WHO team, and participated in three inter-site meetings. Between-site exchange of information was encouraged throughout the study.</p> <p>Authors believed that the success in the improvement of clinical practice and outcomes was mainly attributable to</p> | N/R                 | N/R                  |

| Study # | Author | Year | Primary outcome | Secondary outcomes | Additional outcomes | Laboratory-based measurement | Effect estimate | Process and implementation factors                                                                                                                             | Intervention uptake | Cost of intervention |
|---------|--------|------|-----------------|--------------------|---------------------|------------------------------|-----------------|----------------------------------------------------------------------------------------------------------------------------------------------------------------|---------------------|----------------------|
|         |        |      |                 |                    |                     |                              |                 | <p>the motivation of site staff to improve their practices, and the status of local project leaders as influential members of their respective departments</p> |                     |                      |

| Study # | Author    | Year | Primary outcome                                                                                                                                                               | Secondary outcomes | Additional outcomes     | Laboratory-based measurement | Effect estimate                                                                                                                                                                                                                                                                                                                                                                                                                                                                                                                                                                                                                                                                                                                                                                                                                                                                                                                                                                                                                                                                                                       | Process and implementation factors | Intervention uptake | Cost of intervention |
|---------|-----------|------|-------------------------------------------------------------------------------------------------------------------------------------------------------------------------------|--------------------|-------------------------|------------------------------|-----------------------------------------------------------------------------------------------------------------------------------------------------------------------------------------------------------------------------------------------------------------------------------------------------------------------------------------------------------------------------------------------------------------------------------------------------------------------------------------------------------------------------------------------------------------------------------------------------------------------------------------------------------------------------------------------------------------------------------------------------------------------------------------------------------------------------------------------------------------------------------------------------------------------------------------------------------------------------------------------------------------------------------------------------------------------------------------------------------------------|------------------------------------|---------------------|----------------------|
| 3       | Alp et al | 2014 | <p>HAls per 1,000 patient-days</p> <p>Device utilization and device-associated infection rates per 100 patients</p> <p>Incidence of multi-resistant microorganisms (MROs)</p> | N/R                | Hand hygiene compliance | N/R                          | <p>The HAI rate was 42.6/1,000 patient-days at baseline and increased significantly thereafter until 2012, when it decreased by 20% to 33.6/1,000 patient-days (IRR, 0.8; P = 0.001).</p> <p>The rate of central line-associated bloodstream infection was 7.85 (95% confidence interval [CI], 5.89-10.26)/1,000 catheter-days in 2004 and increased to 12.4 (95% CI, 9.98-14.39)/1,000 catheter-days in 2012 (IRR, 1.5; P 0.024).</p> <p>The rate of ventilator-associated pneumonia remained stable from the 2004 baseline rate of 31.66/1,000 ventilator-days to the 2012 rate of 24.04/ 1,000 ventilator-days (IRR, 0.88; P = 0.574).</p> <p>The rate of catheter-associated urinary tract infection remained relatively stable between 2004 and 2012 (from 7.92/1,000 catheter-days to 4.97/1,000 catheterdays; P = 0.101).</p> <p>The rate of methicillin-resistant Staphylococcus aureus infection was 6.24/1,000 patient days at baseline and decreased significantly to 0.73/1,000 patient-days by 2007 (IRR, 0.13; P &lt;.001) and continued to remain below 2/1,000 patient-days for the next 5 years.</p> | N/R                                | N/R                 | N/R                  |



| Study # | Author | Year | Primary outcome | Secondary outcomes | Additional outcomes | Laboratory-based measurement | Effect estimate                                                                                                                                                                                                                                                                                                                                                                                                                                                                                                                                                                                                  | Process and implementation factors | Intervention uptake | Cost of intervention |
|---------|--------|------|-----------------|--------------------|---------------------|------------------------------|------------------------------------------------------------------------------------------------------------------------------------------------------------------------------------------------------------------------------------------------------------------------------------------------------------------------------------------------------------------------------------------------------------------------------------------------------------------------------------------------------------------------------------------------------------------------------------------------------------------|------------------------------------|---------------------|----------------------|
|         |        |      |                 |                    |                     |                              | <p>The rate of <i>Pseudomonas aeruginosa</i> infection decreased significantly from 8.66/1,000 patient-days in 2004 to 6.09/1,000 patient-days in 2010 (IRR, 0.72; P = 0.026) and to 5.44/1,000 patient-days by 2012 (IRR, 0.63; P = 0.002).</p> <p>The rate of <i>Acinetobacter baumannii</i> infection was 14.3/1,000 patient-days at baseline, decreased significantly by 2005 (IRR, 0.73; P = 0.012), fluctuated between 2006 and 2010, and then decreased significantly to 10.44/1,000 patient days in 2011 (IRR, 0.74; P = 0.007) and then to 7.6/1,000 patient-days in 2012 (IRR, 0.53; P &lt; .001).</p> |                                    |                     |                      |

| Study # | Author               | Year | Primary outcome                                        | Secondary outcomes | Additional outcomes | Laboratory-based measurement | Effect estimate                                                                                                                                                                                                                                                                                        | Process and implementation factors | Intervention uptake | Cost of intervention |
|---------|----------------------|------|--------------------------------------------------------|--------------------|---------------------|------------------------------|--------------------------------------------------------------------------------------------------------------------------------------------------------------------------------------------------------------------------------------------------------------------------------------------------------|------------------------------------|---------------------|----------------------|
| 4       | Alvarez-Moreno et al | 2016 | Central line-associated bloodstream infection (CLABSI) | N/R                | N/R                 | N/R                          | The baseline rate of 12.9 CLABSIs per 1,000 central line (CL) days, with 3,032 CL days and 39 CLABSIs, was reduced to 3.5 CLABSIs per 1,000 CL days, with 3,686 CL days and 13 CLABSIs, accounting for a 73% CLABSI rate reduction (relative risk, 0.27; 95% confidence interval, 0.14-0.52; P=0.002). | N/R                                | N/R                 | N/R                  |

| Study # | Author                | Year | Primary outcome                                                            | Secondary outcomes                                                                                   | Additional outcomes | Laboratory-based measurement                                                                                                                            | Effect estimate                                                                                                                                                                                                                                                                                                                                                                                                                                                                                                                                                                                                                                                                                                               | Process and implementation factors | Intervention uptake | Cost of intervention |
|---------|-----------------------|------|----------------------------------------------------------------------------|------------------------------------------------------------------------------------------------------|---------------------|---------------------------------------------------------------------------------------------------------------------------------------------------------|-------------------------------------------------------------------------------------------------------------------------------------------------------------------------------------------------------------------------------------------------------------------------------------------------------------------------------------------------------------------------------------------------------------------------------------------------------------------------------------------------------------------------------------------------------------------------------------------------------------------------------------------------------------------------------------------------------------------------------|------------------------------------|---------------------|----------------------|
| 5       | Apisarnthanarak et al | 2014 | VAP<br>CAUTI<br>CLABSI<br><br>*these were secondary outcomes in this study | Drug-resistant (XDR)<br>Acinetobacter baumannii<br><br>*though was the primary outcome of this study | N/R                 | Culture for XDR A baumannii<br><br>Surveillance specimens were inoculated onto MacConkey agar with a 10-mg imipenem disk and incubated for up to 5 days | <p>Compared with P1 (11.1 cases/1,000 patient-days), the rate of XDR A baumannii clinical isolates declined in P2 (1.74 cases/1,000 patient-days; P &lt; .001) and further in P3 (12 month follow up period) (0.69 cases/1,000 patient-days; P &lt; .001).</p> <p>Compared with P1 (12.15 cases/1,000 patient days), the rate of XDR A baumannii surveillance isolates also declined in P2 (2.11 cases/1,000 patient days; P &lt; .001) and P3 (0.98 cases/1,000 patient-days; P &lt; .001). Incidence of nosocomial infections remained stable.</p> <p>CLABSI rate P1 = 1.44, P2= 1.20, P3 = 1.14 (all NS)<br/>CAUTI rate P1 = 2.25, P2 = 1.96, P3 = 2.10 (all NS)<br/>VAP rate P1 = 4.12, P2 = 3.64, P3 = 2.98 (all NS)</p> | N/R                                | N/R                 | N/R                  |

| Study # | Author                | Year | Primary outcome                                    | Secondary outcomes                                                                                                                                                                                                                                               | Additional outcomes | Laboratory-based measurement | Effect estimate                                                                                                                                                                                                                                                                                                              | Process and implementation factors | Intervention uptake | Cost of intervention |
|---------|-----------------------|------|----------------------------------------------------|------------------------------------------------------------------------------------------------------------------------------------------------------------------------------------------------------------------------------------------------------------------|---------------------|------------------------------|------------------------------------------------------------------------------------------------------------------------------------------------------------------------------------------------------------------------------------------------------------------------------------------------------------------------------|------------------------------------|---------------------|----------------------|
| 6       | Apisarnthanarak et al | 2010 | Catheter-associated bloodstream infection (CA-BSI) | <p>Methicillin-resistant Staphylococcus aureus, coagulase negative Staphylococcus spp, extended-spectrum beta-lactamase (ESBL)-producing Escherichia coli and Klebsiella pneumoniae, and multidrug-resistant (MDR) Acinetobacter baumannii`</p> <p>Mortality</p> | N/R                 | N/R                          | <p>During period 2, the CA-BSI rate decreased by 54.1 % (6.4 cases per 1000 catheter-days; P ,.001).</p> <p>The CA-BSI rate was further decreased by 78% (1.4 cases per 1000 catheter-days; P ,.001) during period 3.</p> <p>Not significant change in mortality<br/> P1 = 12%<br/> P2 = 12%<br/> P3 = 13% (of patients)</p> | N/R                                | N/R                 | N/R                  |

| Study # | Author     | Year | Primary outcome | Secondary outcomes | Additional outcomes | Laboratory-based measurement                                                                                                                                                                                                                 | Effect estimate                                                                                                                                                                                                                                                                                                                                                                                                                                                            | Process and implementation factors | Intervention uptake | Cost of intervention |
|---------|------------|------|-----------------|--------------------|---------------------|----------------------------------------------------------------------------------------------------------------------------------------------------------------------------------------------------------------------------------------------|----------------------------------------------------------------------------------------------------------------------------------------------------------------------------------------------------------------------------------------------------------------------------------------------------------------------------------------------------------------------------------------------------------------------------------------------------------------------------|------------------------------------|---------------------|----------------------|
| 7       | Azab et al | 2015 | VAP             | Mortality          | N/R                 | The clinical microbiological laboratory analyzed the samples using Bact/Alert 3D-Biomerieux-France and provided microorganism identification followed by antibiotic sensitivity according to the isolate using Vitek MS – Biomerieux-France. | <p>The rate of VAP was significantly reduced from 67.8 % (42/62) corresponding to 36.4 VAP episodes/1000 mechanical ventilation days (MV days) in phase-I to 38.2 % (31/81) corresponding to 23 VAP/1000 MV days (RR 0.565, 95 % confidence interval 0.408-0.782, p = 0.0006) after VAP prevention bundle implementation (phase-II).</p> <p>Overall mortality reduced from 25 % to 17.3 %, p = 0.215 between the two phases but didn't reach statistical significance.</p> | N/R                                | N/R                 | N/R                  |

| Study # | Author          | Year | Primary outcome                     | Secondary outcomes | Additional outcomes                                                        | Laboratory-based measurement         | Effect estimate                                                                                                                                                                                                                                                                                                                                                                                                                                                                                                                                                                                                                                                                                                                                                                                                                                        | Process and implementation factors | Intervention uptake | Cost of intervention |
|---------|-----------------|------|-------------------------------------|--------------------|----------------------------------------------------------------------------|--------------------------------------|--------------------------------------------------------------------------------------------------------------------------------------------------------------------------------------------------------------------------------------------------------------------------------------------------------------------------------------------------------------------------------------------------------------------------------------------------------------------------------------------------------------------------------------------------------------------------------------------------------------------------------------------------------------------------------------------------------------------------------------------------------------------------------------------------------------------------------------------------------|------------------------------------|---------------------|----------------------|
| 8       | Guanche-Garcell | 2013 | VAP: VAP rates per 1000 device-days | Mortality          | Bacterial resistance, length of stay, microorganism profile, HH compliance | Cultures taken, none other specified | <p>During baseline, the VAP rate was 52.63 VAPs per 1000 MV-days, whereas the VAP rate was 15.32 per 1000 MV days during intervention (RR 0.3; 95% CI 0.12—0.7; P 0.003). These results showed a 70% VAP rate reduction</p> <p>In comparison to the baseline VAP rates for the 3 months before the intervention, VAP rates were reduced by:</p> <p>73% after 9 months of participation (from 52.63 to 14.36 VAPs per 1000 MV-days, RR = 0.27 (0.09—0.79) P= 0.0099)</p> <p>This rate was further reduced by 58% during the second year (from 52.63 to 22 VAPs per 1000 MV-days, RR = 0.42 (0.16—1.07) P= 0.0604),</p> <p>75% during the third year (from 52.63 to 18.35 VAPs per 1000 MV-days RR = 0.35 (0.13—0.96) P = 0.0326) and</p> <p>90% during the fourth year (from 52.63 to 5.34 VAPs per 1000 MV-days, RR = 0.10 (0.03—0.41) P = 0.0001)</p> | N/R                                | N/R                 | N/R                  |

| Study # | Author     | Year | Primary outcome                                                                                 | Secondary outcomes | Additional outcomes                | Laboratory-based measurement                                                                                                                                                                                                                                                                                                                                                                                           | Effect estimate                                                                                                                                                                                                                                                                           | Process and implementation factors | Intervention uptake | Cost of intervention |
|---------|------------|------|-------------------------------------------------------------------------------------------------|--------------------|------------------------------------|------------------------------------------------------------------------------------------------------------------------------------------------------------------------------------------------------------------------------------------------------------------------------------------------------------------------------------------------------------------------------------------------------------------------|-------------------------------------------------------------------------------------------------------------------------------------------------------------------------------------------------------------------------------------------------------------------------------------------|------------------------------------|---------------------|----------------------|
| 9       | Jagi et al | 2013 | Central line-associated bloodstream infections (CLABSI)<br><br>Rates of CLABSI per 1000 CL days | N/R                | Hand hygiene compliance (of staff) | Cultures. A laboratory confirmed CLABSI was defined in the following case: A patient with a CL from whom a recognized pathogen is isolated from one or more percutaneous blood cultures after 48 h of catheterization; the pathogen cultured from the blood is not related to an infection at another site; and the patient has one or more of the following signs or symptoms: fever (38.8°C), chills, or hypotension | The baseline rate was 6.4 CLABSIs per 1000 CL-days, which was reduced to 3.9 CLABSIs per 1000 CL-days in the second year and maintained for 36 months of follow-up, accounting for a 53% CLABSI rate reduction (incidence rate ratio 0.47, 95% confidence interval 0.31–0.70; p = 0.0001) | N/R                                | N/R                 | N/R                  |

| Study # | Author       | Year | Primary outcome                                                                                                  | Secondary outcomes | Additional outcomes | Laboratory-based measurement | Effect estimate                                                                                                                                                                                                                                                                                                                          | Process and implementation factors | Intervention uptake | Cost of intervention |
|---------|--------------|------|------------------------------------------------------------------------------------------------------------------|--------------------|---------------------|------------------------------|------------------------------------------------------------------------------------------------------------------------------------------------------------------------------------------------------------------------------------------------------------------------------------------------------------------------------------------|------------------------------------|---------------------|----------------------|
| 10      | Kurlat et al | 1998 | Overall rates of bacteraemia (BR) and rates of Gram negative bacteraemia (GNBR) calculated per 1000 patient-days | None               | N/R                 | Blood cultures               | <p>Bacteraemia rate was 20/1000 patient days at baseline and dropped to 12.4 /1000 patient days after the intervention was introduced (<math>p &lt; 0.004</math>).</p> <p>The gram negative bacteremia rate was 7.7/1000 patient days at baseline and the dropped to 2.2/1000 patient days at end line, (<math>p &lt; 0.0002</math>)</p> | N/R                                | N/R                 | N/R                  |



| Study # | Author             | Year | Primary outcome | Secondary outcomes | Additional outcomes     | Laboratory-based measurement                                                     | Effect estimate                                                                                                                                                                                                      | Process and implementation factors | Intervention uptake | Cost of intervention |
|---------|--------------------|------|-----------------|--------------------|-------------------------|----------------------------------------------------------------------------------|----------------------------------------------------------------------------------------------------------------------------------------------------------------------------------------------------------------------|------------------------------------|---------------------|----------------------|
| 11      | Lelebicioglu et al | 2013 | CAUTI rate      | N/R                | Hand hygiene compliance | Urine culture and dipstick analysis for leukocyte esterase or nitrate and pyuria | During Baseline, the rate of CAUTI was 10.63 per 1,000 UC-days and was significantly decreased by 47% at end line to 5.65 per 1,000 UC-days (relative risk, 0.53; 95% confidence interval: 0.4-0.7; P value ¼ .0001) |                                    | N/R                 | N/R                  |

| Study # | Author              | Year | Primary outcome                                              | Secondary outcomes | Additional outcomes     | Laboratory-based measurement | Effect estimate                                                                                                                                                                                                                               | Process and implementation factors | Intervention uptake | Cost of intervention |
|---------|---------------------|------|--------------------------------------------------------------|--------------------|-------------------------|------------------------------|-----------------------------------------------------------------------------------------------------------------------------------------------------------------------------------------------------------------------------------------------|------------------------------------|---------------------|----------------------|
| 12      | Leblebicioglu et al | 2013 | Central line-associated blood stream infections (CLAB) rates | N/R                | Hand hygiene compliance | Blood cultures               | The baseline CLAB rate was 22.7 per 1000 CL days, which was decreased during the intervention period to 12.0 CLABs per 1000 CL days (IRR 0.613; 95% CI 0.43 – 0.87; P 0.007). This amounted to a 39% reduction in the incidence rate of CLAB. |                                    | N/R                 | N/R                  |

| Study # | Author              | Year | Primary outcome | Secondary outcomes | Additional outcomes     | Laboratory-based measurement | Effect estimate                                                                                                                                                                                            | Process and implementation factors | Intervention uptake | Cost of intervention |
|---------|---------------------|------|-----------------|--------------------|-------------------------|------------------------------|------------------------------------------------------------------------------------------------------------------------------------------------------------------------------------------------------------|------------------------------------|---------------------|----------------------|
| 13      | Leblebicioglu et al | 2013 | VAP             | N/R                | Hand hygiene compliance | Blood cultures               | The rate of VAP was 31.14 per 1,000 MV-days during baseline period and 16.82 per 1,000 MV-days intervention period, amounting to a 46 % VAP rate reduction (RR, 0.54; 95 % CI, 0.42–0.7; P value, 0.0001.) | N/R                                | N/R                 | N/R                  |

| Study # | Author     | Year | Primary outcome                                                      | Secondary outcomes | Additional outcomes                                                                               | Laboratory-based measurement | Effect estimate                                                                                                                                                                                                                                                                       | Process and implementation factors                                                                                                               | Intervention uptake | Cost of intervention |
|---------|------------|------|----------------------------------------------------------------------|--------------------|---------------------------------------------------------------------------------------------------|------------------------------|---------------------------------------------------------------------------------------------------------------------------------------------------------------------------------------------------------------------------------------------------------------------------------------|--------------------------------------------------------------------------------------------------------------------------------------------------|---------------------|----------------------|
| 14      | Lenz et al | 2018 | Catheter-related infections (CRIs)<br><br>CRI rate per 1000 CVC days | N/R                | Prevention (CDC), CVC use rate, adherence to hand washing, and adherence to CVC insertion control | N/R                          | The total number of CRIs was 117 and 74 before and after the intervention, respectively. The rate of CRIs was 8.6/1000 days of central venous catheter use and 5.8/1000 days before and after the intervention, respectively; RR: 0.82 (95% confidence interval: 0.68-0.98), p= 0.015 | All staff members involved in patient care participated in the program, including technicians and cleaning staff, not only physicians and nurses | N/R                 | N/R                  |

| Study # | Author      | Year | Primary outcome                                        | Secondary outcomes | Additional outcomes                                                                           | Laboratory-based measurement                                                                       | Effect estimate                                                                                                                                                                                                                                      | Process and implementation factors | Intervention uptake | Cost of intervention |
|---------|-------------|------|--------------------------------------------------------|--------------------|-----------------------------------------------------------------------------------------------|----------------------------------------------------------------------------------------------------|------------------------------------------------------------------------------------------------------------------------------------------------------------------------------------------------------------------------------------------------------|------------------------------------|---------------------|----------------------|
| 15      | Marra et al | 2010 | Central line-associated bloodstream infection (CLABSI) | N/R                | Device utilization ratio (calculated by dividing the catheter days by number of patient-days) | All isolates were identified by manual or automated methods and confirmed using the Vitek 2 system | The mean incidence density of CLABSI per 1000 catheter-days in the ICU was 6.4 in phase 1 and 3.2 in phase 2, P = 0.001.<br>The mean incidence density of CLABSI per 1000 catheter-days in the SDUs was 4.1 in phase 1 and 1.6 in phase 2, P = 0.005 | N/R                                | N/R                 | N/R                  |

| Study # | Author      | Year | Primary outcome | Secondary outcomes | Additional outcomes | Laboratory-based measurement | Effect estimate                                                                                                                                                                                                                                                      | Process and implementation factors | Intervention uptake | Cost of intervention |
|---------|-------------|------|-----------------|--------------------|---------------------|------------------------------|----------------------------------------------------------------------------------------------------------------------------------------------------------------------------------------------------------------------------------------------------------------------|------------------------------------|---------------------|----------------------|
| 16      | Mehta et al | 2013 | VAP             | N/R                | N/R                 | N/R                          | <p>The VAP rate was 17.43/1000 mechanical ventilator days during baseline, and 10.81 for intervention, showing a 38% VAP rate reduction (relative risk 0.62, 95% confidence interval 0.5–0.78, P=0.0001)</p> <p>NB: across whole intervention period = 84 months</p> |                                    | N/R                 | N/R                  |

| Study # | Author      | Year | Primary outcome                                                                                   | Secondary outcomes | Additional outcomes                       | Laboratory-based measurement                                                                                                                                                                                                                                                                                                                             | Effect estimate                                                                                                                                                                                                                                                                                                                                                                                                                                                                          | Process and implementation factors | Intervention uptake | Cost of intervention |
|---------|-------------|------|---------------------------------------------------------------------------------------------------|--------------------|-------------------------------------------|----------------------------------------------------------------------------------------------------------------------------------------------------------------------------------------------------------------------------------------------------------------------------------------------------------------------------------------------------------|------------------------------------------------------------------------------------------------------------------------------------------------------------------------------------------------------------------------------------------------------------------------------------------------------------------------------------------------------------------------------------------------------------------------------------------------------------------------------------------|------------------------------------|---------------------|----------------------|
| 17      | Murni et al | 2015 | The proportion of patients with an HAI, between the preintervention and postintervention periods. | N/R                | Antibiotic use<br>Hand hygiene compliance | Blood cultures: The BACTEC 9120 (BD Diagnostics, Sparks, Maryland, USA) was used for blood cultures. For each positive culture result, the type of isolated organism, number of positive culture sites, time to culture positivity, the presence of focal or generalized clinical signs of infection and an overall assessment of illness were recorded. | <p>The risk of a patient developing a HAI decreased from 22.6% (95% CIs 20.3% to 24.9%) in the pre-intervention period to 8.6% (95% CI 7.3% to 10.2%) in the post-intervention period: RR 0.38 (95% CI 0.31 to 0.46)</p> <p>There was a reduction in the incidence density rate of HAI from 29.1 per 1000 patient days (360/12 358) to 9.3 (125/13 498) per 1000 patient days</p> <p>In-hospital mortality decreased from 10.4% (127/1227) to 8% (114/1419) (RR 0.78 (0.61 to 0.97))</p> | N/R                                | N/R                 | N/R                  |

| Study # | Author      | Year | Primary outcome              | Secondary outcomes                  | Additional outcomes                                                                                                                                                                                                                        | Laboratory-based measurement                                                     | Effect estimate                                                                                                                                                                                                 | Process and implementation factors | Intervention uptake | Cost of intervention |
|---------|-------------|------|------------------------------|-------------------------------------|--------------------------------------------------------------------------------------------------------------------------------------------------------------------------------------------------------------------------------------------|----------------------------------------------------------------------------------|-----------------------------------------------------------------------------------------------------------------------------------------------------------------------------------------------------------------|------------------------------------|---------------------|----------------------|
| 18      | Navoa et al | 2013 | CAUTI rates per 1000 UC-days | Mortality in the participating ICUs | Use of invasive devices (central line, mechanical ventilator, and UC), severity ill-ness score, underlying diseases, use of antibiotics, cultures taken, microorganism profile, bacterial resistance, length of stay.<br><br>HH compliance | Urine culture and dipstick analysis for leukocyte esterase or nitrate and pyuria | The rate of CAUTI was 11.0 per 1000 UC-days at baseline and was decreased by 76% to 2.66 per 1000 UC-days during intervention [rate ratio [RR], 0.24; 95% confidence interval [CI], 0.11—0.53; P-value, 0.0001] | N/R                                | N/R                 | N/R                  |



| Study # | Author       | Year | Primary outcome                                                                                                                         | Secondary outcomes | Additional outcomes | Laboratory-based measurement | Effect estimate                                                                                                                                                                                                                                                                                                                                                                                                                                                                                     | Process and implementation factors | Intervention uptake | Cost of intervention |
|---------|--------------|------|-----------------------------------------------------------------------------------------------------------------------------------------|--------------------|---------------------|------------------------------|-----------------------------------------------------------------------------------------------------------------------------------------------------------------------------------------------------------------------------------------------------------------------------------------------------------------------------------------------------------------------------------------------------------------------------------------------------------------------------------------------------|------------------------------------|---------------------|----------------------|
| 19      | Ng Y.Y et al | 2015 | PICU-acquired bloodstream infection (BSI), which included clinical sepsis and laboratory-confirmed BSI, and CLABSIs per 1,000 CVC-days. | Mortality          | N/R                 | Blood culture                | <p>The incidence rates of PICU-acquired BSIs were 88 per 1,000 admissions in baseline period and 41 per 1,000 admissions in end line period</p> <p>The incidence rates of catheter-related BSIs were 25.2 per 1,000 CVC-days in the baseline period and 9.3 per 1,000 CVC-days in the end line period. This translates to a 63% reduction in CLABSI during the intervention period (<math>p &lt; 0.05</math>).</p> <p>PICU mortality baseline 9.1% (26/285), ENDLINE = 8.9% (39/436).<br/>P=0.9</p> | N/R                                | N/R                 | N/R                  |

| Study # | Author       | Year | Primary outcome    | Secondary outcomes | Additional outcomes | Laboratory-based measurement | Effect estimate                                                                                                                                                                                                                                                                                                                                                                                                                                                                                                                                                                                                                                                                                                                                                                                                                                                                                                                                  | Process and implementation factors | Intervention uptake | Cost of intervention |
|---------|--------------|------|--------------------|--------------------|---------------------|------------------------------|--------------------------------------------------------------------------------------------------------------------------------------------------------------------------------------------------------------------------------------------------------------------------------------------------------------------------------------------------------------------------------------------------------------------------------------------------------------------------------------------------------------------------------------------------------------------------------------------------------------------------------------------------------------------------------------------------------------------------------------------------------------------------------------------------------------------------------------------------------------------------------------------------------------------------------------------------|------------------------------------|---------------------|----------------------|
| 20      | Ogwang et al | 2013 | Prevalence of HCAI | N/R                | N/R                 | No lab tests done            | <p>At baseline, 139 infections were detected in 115 of 410 surveyed patients, giving a prevalence of HAI of 34% and a prevalence of patients with HAI of 28%.</p> <p>At end line, 55 infections were detected in 45 of the 318 patients surveyed, giving a prevalence of HAI of 17% and a prevalence of patients with HAIs of 14%</p> <p>These data represent a 49.5% decrease in the prevalence of infected patients (<math>P &lt; 0.0001</math>) and a 56% decline in the prevalence of HAI (<math>P &lt; 0.0001</math>) compared with 2010</p> <p><u>Specific infections</u><br/> Urinary tract- baseline = 28/410, end line = 23/318, <math>p=0.83</math></p> <p>Surgical wound, BL = 26/410, EL = 9/318, <math>p = 0.02</math></p> <p>Respiratory tract, BL = 33/410, EL = 7/318, <math>p=0.001</math></p> <p>Bloodstream, BL=43/410, EL=14/318, <math>p=0.002</math></p> <p>Gastrointestinal, BL=9/410, EL=2/318, <math>p=0.125</math></p> | N/R                                | N/R                 | N/R                  |

| Study # | Author          | Year | Primary outcome | Secondary outcomes | Additional outcomes | Laboratory-based measurement                                       | Effect estimate                                                                                                                                                           | Process and implementation factors | Intervention uptake | Cost of intervention |
|---------|-----------------|------|-----------------|--------------------|---------------------|--------------------------------------------------------------------|---------------------------------------------------------------------------------------------------------------------------------------------------------------------------|------------------------------------|---------------------|----------------------|
| 21      | Rosenthal et al | 2006 | VAP rates       | N/R                | N/R                 | Blood culture - not all patients, some just diagnosed by physician | Rates of VAP were significantly lower in phase 2 than in phase 1 (51.28 vs 35.50 episodes of VAP per 1000 MV-days, respectively, RR = 0.69, 95% CI: 0.49-0.98, P = 0.003) | N/R                                | N/R                 | N/R                  |

| Study # | Author          | Year | Primary outcome | Secondary outcomes | Additional outcomes     | Laboratory-based measurement          | Effect estimate                                                                                                                                                                    | Process and implementation factors | Intervention uptake | Cost of intervention |
|---------|-----------------|------|-----------------|--------------------|-------------------------|---------------------------------------|------------------------------------------------------------------------------------------------------------------------------------------------------------------------------------|------------------------------------|---------------------|----------------------|
| 22      | Rosenthal et al | 2005 | HCAIs           | N/R                | Hand hygiene compliance | Blood, urine cultures where necessary | Overall nosocomial infection in both ICUs decreased from 47.55 per 1000 patient-days (104/2187) to 27.93 per 1000 patient days (207/7409) (RR, 0.59; 95% CI: 0.46-0.74; P = .0001) | N/R                                | N/R                 | N/R                  |

| Study # | Author          | Year | Primary outcome | Secondary outcomes                                                                    | Additional outcomes     | Laboratory-based measurement | Effect estimate                                                                                                                                                                                                                                 | Process and implementation factors | Intervention uptake | Cost of intervention |
|---------|-----------------|------|-----------------|---------------------------------------------------------------------------------------|-------------------------|------------------------------|-------------------------------------------------------------------------------------------------------------------------------------------------------------------------------------------------------------------------------------------------|------------------------------------|---------------------|----------------------|
| 23      | Rosenthal et al | 2012 | CLAB rates      | Prevalence of microorganisms related to central line-associated bloodstream infection | Hand hygiene compliance | Blood cultures               | The CLAB rate was 10.7 per 1,000 CL days in Phase 1, and in Phase 2, the CLAB rate decreased to 5.2 per 1,000 CL days (relative risk [RR] 0.48, 95% confidence interval [CI] 0.29–0.94, P = 0.02), showing a reduction of 52% in the CLAB rate. | N/R                                | N/R                 | N/R                  |

| Study # | Author          | Year | Primary outcome              | Secondary outcomes           | Additional outcomes     | Laboratory-based measurement                                                     | Effect estimate                                                                                                                                                                                                                      | Process and implementation factors | Intervention uptake | Cost of intervention |
|---------|-----------------|------|------------------------------|------------------------------|-------------------------|----------------------------------------------------------------------------------|--------------------------------------------------------------------------------------------------------------------------------------------------------------------------------------------------------------------------------------|------------------------------------|---------------------|----------------------|
| 24      | Rosenthal et al | 2012 | CAUTI rates per 1000 UC-days | Prevalence of microorganisms | Hand hygiene compliance | Urine culture and dipstick analysis for leukocyte esterase or nitrate and pyuria | CAUTI rate was 7.86 per 1,000 UC-days, and in Phase 2, after intervention, the rate of CAUTI decreased to 4.95 per 1,000 UC-days [relative risk (RR) 0.63 (95 % confidence interval [CI] 0.55–0.72)], showing a 37 % rate reduction. | N/R                                | N/R                 | N/R                  |

| Study # | Author                      | Year | Primary outcome | Secondary outcomes | Additional outcomes                                | Laboratory-based measurement | Effect estimate                                                                                                                                                                                                                                                                                                                                                                                                                                                                                                                                                      | Process and implementation factors | Intervention uptake | Cost of intervention |
|---------|-----------------------------|------|-----------------|--------------------|----------------------------------------------------|------------------------------|----------------------------------------------------------------------------------------------------------------------------------------------------------------------------------------------------------------------------------------------------------------------------------------------------------------------------------------------------------------------------------------------------------------------------------------------------------------------------------------------------------------------------------------------------------------------|------------------------------------|---------------------|----------------------|
| 25      | Von Dolinger de Brito et al | 2007 | HCAIs           | N/R                | Device utilization ratios for CVCs and ventilators | Cultures                     | The rate of HAI rose significantly from 12.8 to 18.6% ( $P < 0.01$ ) after moving to the temporary unit, which had a lower sink:cot ratio and a higher monthly admission rate. In contrast, the rates of catheter associated staphylococcal bacteraemia decreased significantly after moving to the new NICU ( $P < 0.0001$ ). Since peripherally inserted central catheters (PICCs) were introduced concomitantly with the move to the new unit, however, the catheter type may have contributed towards this reduction in CVC-related staphylococcal bacteraemias. | N/R                                | N/R                 | N/R                  |

| Study # | Author     | Year | Primary outcome                                          | Secondary outcomes     | Additional outcomes            | Laboratory-based measurement                                                                                                                                                   | Effect estimate                                                                                                                                                                                                                   | Process and implementation factors | Intervention uptake | Cost of intervention |
|---------|------------|------|----------------------------------------------------------|------------------------|--------------------------------|--------------------------------------------------------------------------------------------------------------------------------------------------------------------------------|-----------------------------------------------------------------------------------------------------------------------------------------------------------------------------------------------------------------------------------|------------------------------------|---------------------|----------------------|
| 26      | Zhou et al | 2015 | Central-line associated bloodstream infections (CLABSIs) | Microbiologic profiles | Central Line utilization ratio | Blood cultures were drawn peripherally for all cases. Standard laboratory methods were used to identify microorganisms, and standardized susceptibility testing was performed. | Overall CLABSI rate decreased gradually from 16.7 per 1,000 CL days in phase 1 (pre intervention) to 7.6 per 1,000 CL days in phase 2 (intervention) (P =0.08) to 5.2 per 1,000 CL days in phase 3 (post-intervention) (P < .01). | N/R                                | N/R                 | N/R                  |



| Study # | Author     | Year | Primary outcome | Secondary outcomes | Additional outcomes    | Laboratory-based measurement                  | Effect estimate                                                                                                                                                                                                                                                                                                                                                                                                                                                                                                                                                                                                                                                                                                 | Process and implementation factors                                                                                                | Intervention uptake | Cost of intervention |
|---------|------------|------|-----------------|--------------------|------------------------|-----------------------------------------------|-----------------------------------------------------------------------------------------------------------------------------------------------------------------------------------------------------------------------------------------------------------------------------------------------------------------------------------------------------------------------------------------------------------------------------------------------------------------------------------------------------------------------------------------------------------------------------------------------------------------------------------------------------------------------------------------------------------------|-----------------------------------------------------------------------------------------------------------------------------------|---------------------|----------------------|
| 27      | Zhou et al | 2013 | VAP incidence   | Mortality          | Microbiologic features | Bacterial culture of Tracheobronchial samples | <p>With implementation of the infection control program, there was a sustained decline in the VAP rates during the postintervention period (phase 2 (partial intervention) and phase 3 (full intervention)). There were 54 VAP events in the post-intervention period between 2008 and 2010; that is, a rate of 20.86 VAP/1,000 ventilator-days. When compared with the 48.84 VAP /1,000 ventilator-days in the preinterventional period (phase 1 - pre-intervention), the VAP rate was significantly lower (P = .01)</p> <p>Although VAP rate during phase 3 was further reduced from 25.73 in phase 2 to 18.50 VAP/1,000 ventilator-days, this reduction did not reach statistical significance (P = .15)</p> | VAP rates in neonates decreased significantly when the NICU was moved from a crowded unit to a larger unit with 50% more staffing | N/R                 | N/R                  |
